# Supplementary material for: Gene autoregulation by 3’ UTR-derived bacterial small RNAs
Source: eLife. 2020 Aug 3;9:e58836. doi: 10.7554/eLife.58836 (PMC7398697; doi:10.7554/eLife.58836)
Supplement: Supplementary file 1. [file elife-58836-supp1.xlsx]

## Sheet: Cleavage_sites_44_C_min_coverag
Supplementary File 1: TIER-Seq Sites in Vibrio Cholerae
Replicon	Strand	Position	WT_44_Rep_1	WT_44_Rep_2	WT_44_Rep_3	rne_44_Rep_1	rne_44_Rep_2	rne_44_Rep_3	baseMean	log2FoldChange	lfcSE	stat	pvalue	padj	Locus_tag	Gene_name
NC_002505_KPS-14	+	370	11	35	3	0	1	2	9.79178	4.44752	1.30905	3.3975	0.000680044	0.00177752	-	-
NC_002505_KPS-14	+	558	3	42	3	2	1	2	10.1023	3.66596	1.27095	2.88443	0.00392126	0.00805273	-	-
NC_002505_KPS-14	+	709	4	25	6	0	2	0	7.07161	4.4689	1.48058	3.01835	0.00254155	0.00552186	-	-
NC_002505_KPS-14	+	833	5	21	4	0	0	1	5.88811	5.17159	1.59236	3.24774	0.00116324	0.00280885	-	-
NC_002505_KPS-14	+	4422	22	10	10	1	3	2	8.57466	3.11776	0.941265	3.31231	0.000925296	0.00231125	-	-
NC_002505_KPS-14	+	4668	7	29	9	3	1	1	9.39855	3.51287	1.07524	3.26707	0.00108668	0.00265091	-	-
NC_002505_KPS-14	+	5242	2	22	2	2	1	1	5.67132	3.06777	1.361	2.25406	0.0241927	0.0398176	-	-
NC_002505_KPS-14	+	5335	5	26	7	3	1	5	8.58591	2.49341	1.02569	2.43097	0.0150586	0.0262312	-	-
NC_002505_KPS-14	+	5907	4	21	2	0	0	1	5.33855	5.02687	1.68249	2.98776	0.0028103	0.0060239	-	-
NC_002505_KPS-14	+	6302	10	8	22	3	6	6	9.64726	1.75758	0.808692	2.17336	0.0297531	0.0477409	-	-
NC_002505_KPS-14	+	7393	91	85	80	15	14	15	54.1833	2.86803	0.435635	6.58358	4.59262e-11	1.28967e-09	-	-
NC_002505_KPS-14	+	7439	27	9	11	0	4	2	9.43399	3.27191	1.01541	3.22224	0.00127193	0.0030323	VC0012	dnaA
NC_002505_KPS-14	+	7474	20	34	16	5	0	6	14.7564	3.05317	0.857462	3.56071	0.000369852	0.00105947	VC0012	dnaA
NC_002505_KPS-14	+	7542	42	29	23	2	3	3	18.5334	3.88129	0.747345	5.19344	2.06439e-07	2.01576e-06	VC0012	dnaA
NC_002505_KPS-14	+	7546	46	54	29	7	1	4	25.9028	3.7573	0.718633	5.22839	1.70991e-07	1.72006e-06	VC0012	dnaA
NC_002505_KPS-14	+	7547	354	386	282	22	27	23	201.484	4.15292	0.394144	10.5365	5.86103e-26	2.14408e-23	VC0012	dnaA
NC_002505_KPS-14	+	7606	23	26	16	1	3	2	13.0295	3.77388	0.854929	4.41426	1.01354e-05	5.30653e-05	VC0012	dnaA
NC_002505_KPS-14	+	7607	20	12	6	1	2	1	7.58448	3.55249	1.07301	3.31078	0.000930377	0.00232195	VC0012	dnaA
NC_002505_KPS-14	+	7629	78	27	62	4	5	3	32.3747	4.09173	0.690039	5.92971	3.03466e-09	5.24826e-08	VC0012	dnaA
NC_002505_KPS-14	+	7630	23	19	34	4	1	2	15.1942	3.76226	0.822005	4.57693	4.71847e-06	2.80337e-05	VC0012	dnaA
NC_002505_KPS-14	+	7637	111	139	134	15	11	12	77.5926	3.66757	0.456338	8.03697	9.20909e-16	6.77911e-14	VC0012	dnaA
NC_002505_KPS-14	+	7638	11	20	15	0	2	2	9.24579	3.89255	1.03388	3.765	0.000166551	0.000541979	VC0012	dnaA
NC_002505_KPS-14	+	7748	34	56	48	0	3	2	26.704	5.14232	0.853793	6.02291	1.71304e-09	3.18296e-08	VC0012	dnaA
NC_002505_KPS-14	+	7856	45	25	25	12	18	8	23.2891	1.60027	0.605265	2.64393	0.00819506	0.0153608	VC0012	dnaA
NC_002505_KPS-14	+	7936	34	53	23	5	0	3	21.8788	4.12825	0.838404	4.92394	8.48179e-07	6.7195e-06	VC0012	dnaA
NC_002505_KPS-14	+	7977	7	37	7	2	0	0	10.153	5.00848	1.42459	3.51574	0.000438523	0.00122319	VC0012	dnaA
NC_002505_KPS-14	+	7980	13	22	11	1	0	1	8.95512	4.88389	1.2689	3.84893	0.000118634	0.000407662	VC0012	dnaA
NC_002505_KPS-14	+	7983	29	59	29	1	0	0	22.2906	7.11588	1.3364	5.32466	1.01144e-07	1.09744e-06	VC0012	dnaA
NC_002505_KPS-14	+	7984	18	30	19	2	0	0	12.9415	5.39168	1.22908	4.38675	1.15056e-05	5.9006e-05	VC0012	dnaA
NC_002505_KPS-14	+	8120	42	38	45	1	2	0	23.7373	5.69676	0.979511	5.81593	6.02992e-09	9.61056e-08	VC0012	dnaA
NC_002505_KPS-14	+	8126	27	60	23	3	8	7	23.4952	2.97542	0.708897	4.19725	2.70171e-05	0.000119512	VC0012	dnaA
NC_002505_KPS-14	+	8128	17	36	11	6	0	5	13.7262	2.91272	0.934135	3.1181	0.00182023	0.0041316	VC0012	dnaA
NC_002505_KPS-14	+	8201	299	239	232	21	16	12	150.232	4.27407	0.435143	9.82221	9.03421e-23	2.11605e-20	VC0012	dnaA
NC_002505_KPS-14	+	8202	140	122	131	23	18	28	83.1577	2.84933	0.387878	7.34595	2.04305e-13	9.61537e-12	VC0012	dnaA
NC_002505_KPS-14	+	8204	232	149	148	13	4	13	101.96	4.47321	0.511003	8.75378	2.06331e-18	2.41242e-16	VC0012	dnaA
NC_002505_KPS-14	+	8205	50	31	28	12	7	13	24.7777	2.09624	0.558606	3.75263	0.000174987	0.000564885	VC0012	dnaA
NC_002505_KPS-14	+	8206	63	63	48	21	10	33	41.5578	1.81467	0.509854	3.55919	0.000371998	0.00106463	VC0012	dnaA
NC_002505_KPS-14	+	8211	26	7	10	0	5	5	9.21448	2.43641	0.995543	2.44732	0.0143922	0.0252051	VC0012	dnaA
NC_002505_KPS-14	+	8354	50	82	64	7	4	9	39.7958	3.65592	0.574198	6.36701	1.92754e-10	4.60209e-09	VC0012	dnaA
NC_002505_KPS-14	+	8355	26	18	16	0	1	4	11.7446	3.96557	0.953815	4.15758	3.21631e-05	0.000138087	VC0012	dnaA
NC_002505_KPS-14	+	8377	22	22	17	2	0	3	12.0629	3.97065	0.919158	4.31988	1.56116e-05	7.59002e-05	VC0012	dnaA
NC_002505_KPS-14	+	8384	26	19	12	1	0	0	10.691	6.04758	1.37823	4.38791	1.14443e-05	5.87554e-05	VC0012	dnaA
NC_002505_KPS-14	+	8482	20	35	19	0	0	4	14.4541	4.63763	1.04784	4.4259	9.60415e-06	5.07716e-05	VC0012	dnaA
NC_002505_KPS-14	+	8546	62	76	63	7	1	11	40.2884	3.78404	0.627675	6.02866	1.65325e-09	3.08408e-08	VC0012	dnaA
NC_002505_KPS-14	+	8566	16	22	13	0	1	2	9.9764	4.46082	1.09779	4.06345	4.83534e-05	0.000193796	VC0012	dnaA
NC_002505_KPS-14	+	8576	77	85	66	8	5	4	45.1612	4.06247	0.567414	7.15963	8.08967e-13	3.40489e-11	VC0012	dnaA
NC_002505_KPS-14	+	8577	13	31	6	1	4	3	10.6816	3.00837	0.971589	3.09634	0.00195928	0.00440684	VC0012	dnaA
NC_002505_KPS-14	+	8750	30	12	17	1	0	2	11.1974	4.63749	1.09724	4.2265	2.37352e-05	0.000107249	VC0012	dnaA
NC_002505_KPS-14	+	8781	31	31	41	13	4	16	23.9662	2.00387	0.602663	3.32503	0.000884095	0.00222331	VC0012	dnaA
NC_002505_KPS-14	+	8782	50	51	51	11	9	14	33.3199	2.50491	0.488253	5.13035	2.892e-07	2.68909e-06	VC0012	dnaA
NC_002505_KPS-14	+	8795	54	45	51	2	1	0	28.337	5.95801	0.966015	6.16762	6.93272e-10	1.43024e-08	VC0012	dnaA
NC_002505_KPS-14	+	8805	26	16	34	4	3	0	15.1936	3.70983	0.879778	4.21678	2.47815e-05	0.000111181	VC0012	dnaA
NC_002505_KPS-14	+	8811	30	25	25	5	2	3	16.3558	3.32052	0.716652	4.63338	3.59747e-06	2.24331e-05	VC0012	dnaA
NC_002505_KPS-14	+	8859	115	65	118	14	15	19	62.0532	2.96293	0.461034	6.42671	1.30398e-10	3.26272e-09	-	-
NC_002505_KPS-14	+	8860	31	23	29	9	5	7	18.517	2.30332	0.605436	3.8044	0.000142148	0.000474648	-	-
NC_002505_KPS-14	+	8871	51	22	43	9	4	6	24.1467	2.91414	0.642353	4.53667	5.71495e-06	3.29051e-05	-	-
NC_002505_KPS-14	+	8878	61	29	53	27	12	12	34.0974	1.76513	0.589197	2.99582	0.00273709	0.00588743	-	VC0013
NC_002505_KPS-14	+	8900	24	20	45	14	5	5	20.2677	2.18227	0.711134	3.06872	0.00214981	0.00477515	-	VC0013
NC_002505_KPS-14	+	8912	59	37	42	5	4	7	27.7876	3.4429	0.592031	5.8154	6.04902e-09	9.63673e-08	-	VC0013
NC_002505_KPS-14	+	8932	25	8	23	0	1	5	11.0379	3.6151	1.01317	3.56812	0.000359556	0.00103489	-	VC0013
NC_002505_KPS-14	+	9016	50	42	38	4	6	15	27.6171	2.75789	0.58598	4.70645	2.52065e-06	1.6714e-05	-	VC0013
NC_002505_KPS-14	+	9095	33	23	42	0	0	4	18.6695	5.00961	0.986518	5.07808	3.81271e-07	3.40722e-06	-	VC0013
NC_002505_KPS-14	+	9096	45	17	26	4	4	6	18.1143	2.97384	0.693755	4.28659	1.81436e-05	8.58437e-05	-	VC0013
NC_002505_KPS-14	+	9104	91	44	79	20	15	31	48.8932	2.04032	0.483425	4.22056	2.43701e-05	0.000109672	-	VC0013
NC_002505_KPS-14	+	9115	20	12	10	5	6	4	9.99981	1.78545	0.754118	2.36759	0.0179041	0.0305186	-	VC0013
NC_002505_KPS-14	+	9334	25	8	10	3	3	7	9.65586	2.06654	0.833221	2.48019	0.0131314	0.023256	-	VC0013
NC_002505_KPS-14	+	9350	50	12	51	1	5	5	22.2384	3.6896	0.819875	4.50019	6.78912e-06	3.79559e-05	-	VC0013
NC_002505_KPS-14	+	9351	59	27	81	2	1	0	31.2887	6.09507	1.02585	5.94149	2.8245e-09	4.92586e-08	-	VC0013
NC_002505_KPS-14	+	9356	131	72	159	14	3	6	70.3647	4.27225	0.628765	6.79467	1.08564e-11	3.54276e-10	-	VC0013
NC_002505_KPS-14	+	9357	22	19	22	5	6	6	14.2316	2.21982	0.645185	3.44059	0.000580441	0.00155344	-	VC0013
NC_002505_KPS-14	+	9458	39	7	31	2	12	1	16.3604	2.58832	0.98345	2.63188	0.00849136	0.0158496	-	VC0013
NC_002505_KPS-14	+	9459	65	15	35	0	10	0	22.4496	3.73642	1.13179	3.30133	0.000962275	0.00238863	-	VC0013
NC_002505_KPS-14	+	9487	54	12	52	1	1	1	21.9815	5.60473	1.08117	5.18397	2.17207e-07	2.10548e-06	-	VC0013
NC_002505_KPS-14	+	9488	11	9	25	0	1	0	8.54237	5.71732	1.44003	3.97027	7.17907e-05	0.000268496	-	VC0013
NC_002505_KPS-14	+	9491	16	5	20	4	0	4	8.67849	2.69807	1.0148	2.65872	0.00784385	0.0147834	-	VC0013
NC_002505_KPS-14	+	9600	28	16	23	5	0	2	13.4123	3.56499	0.887546	4.01669	5.90224e-05	0.000228339	-	VC0013
NC_002505_KPS-14	+	9601	36	23	41	0	3	4	19.4838	4.1924	0.810585	5.17206	2.31526e-07	2.22312e-06	-	VC0013
NC_002505_KPS-14	+	9696	58	17	36	0	0	2	20.4658	6.142	1.23333	4.98	6.35831e-07	5.25157e-06	-	VC0013
NC_002505_KPS-14	+	9816	56	53	61	11	2	7	34.6385	3.4158	0.611926	5.58205	2.37706e-08	3.15335e-07	-	VC0013
NC_002505_KPS-14	+	10021	67	85	63	8	2	12	43.3818	3.66465	0.591489	6.19563	5.80536e-10	1.22549e-08	VC0014	recF
NC_002505_KPS-14	+	10072	15	38	5	3	2	9	12.9816	2.4815	0.94428	2.62793	0.0085907	0.0160129	VC0014	recF
NC_002505_KPS-14	+	10168	7	23	9	0	0	2	7.69489	4.71599	1.38806	3.39754	0.000679947	0.00177731	VC0014	recF
NC_002505_KPS-14	+	10289	20	64	21	8	6	1	22.4263	3.10257	0.855403	3.62703	0.000286701	0.000854411	VC0014	recF
NC_002505_KPS-14	+	10329	27	4	11	0	2	0	7.87734	4.64681	1.40862	3.29883	0.000970883	0.00240662	VC0014	recF
NC_002505_KPS-14	+	10406	29	30	18	4	5	9	16.9248	2.45815	0.65202	3.77005	0.000163214	0.000532663	VC0014	recF
NC_002505_KPS-14	+	10426	9	100	9	1	3	2	23.8668	4.68948	1.13484	4.13229	3.59169e-05	0.000151319	VC0014	recF
NC_002505_KPS-14	+	10427	6	25	3	1	1	3	7.23666	3.18493	1.18807	2.68076	0.00734562	0.0139533	VC0014	recF
NC_002505_KPS-14	+	10568	37	26	22	2	1	5	16.8148	3.7696	0.777705	4.84709	1.25286e-06	9.32679e-06	VC0014	recF
NC_002505_KPS-14	+	10599	23	25	21	0	2	3	13.5743	4.15223	0.899319	4.61708	3.8918e-06	2.39776e-05	VC0014	recF
NC_002505_KPS-14	+	10644	41	24	27	0	2	3	17.6398	4.54904	0.877258	5.18553	2.15406e-07	2.09009e-06	VC0014	recF
NC_002505_KPS-14	+	10664	20	33	22	6	8	9	17.5021	2.05809	0.622975	3.30365	0.000954351	0.00237267	VC0014	recF
NC_002505_KPS-14	+	10716	206	225	145	81	44	110	141.46	1.65831	0.429855	3.85783	0.000114397	0.000395346	VC0014	recF
NC_002505_KPS-14	+	10727	44	39	49	4	8	7	27.3582	3.13139	0.57351	5.46004	4.76031e-08	5.7553e-07	VC0014	recF
NC_002505_KPS-14	+	10769	47	31	33	4	2	5	22.0916	3.67156	0.669922	5.48058	4.23931e-08	5.21598e-07	VC0014	recF
NC_002505_KPS-14	+	10770	48	42	31	4	4	11	25.1328	3.04158	0.612234	4.96801	6.76439e-07	5.5357e-06	VC0014	recF
NC_002505_KPS-14	+	10777	29	57	40	9	4	5	26.5252	3.14068	0.652851	4.81072	1.50384e-06	1.08905e-05	VC0014	recF
NC_002505_KPS-14	+	10778	22	49	17	6	4	11	19.6795	2.46002	0.716372	3.434	0.000594745	0.00158571	VC0014	recF
NC_002505_KPS-14	+	10787	31	16	11	2	8	2	12.4745	2.54635	0.856585	2.97268	0.00295209	0.00629184	VC0014	recF
NC_002505_KPS-14	+	10879	21	13	21	5	4	5	12.2416	2.29753	0.704284	3.26222	0.00110545	0.00268934	VC0014	recF
NC_002505_KPS-14	+	10926	185	272	158	4	4	1	116.93	6.41355	0.668372	9.59578	8.32826e-22	1.65518e-19	VC0014	recF
NC_002505_KPS-14	+	10927	15	27	13	1	0	0	10.5391	6.02274	1.39368	4.32147	1.54995e-05	7.54436e-05	VC0014	recF
NC_002505_KPS-14	+	10931	16	15	23	7	0	0	11.197	3.19617	1.12651	2.83723	0.00455072	0.00917002	VC0014	recF
NC_002505_KPS-14	+	10985	232	175	217	15	14	15	122.207	4.14895	0.407529	10.1807	2.41701e-24	6.8461e-22	VC0014	recF
NC_002505_KPS-14	+	10986	161	122	148	15	7	16	85.4446	3.84136	0.455175	8.43931	3.19223e-17	3.04594e-15	VC0014	recF
NC_002505_KPS-14	+	10987	11	18	22	1	2	9	11.2069	2.51764	0.869766	2.89462	0.00379619	0.00783074	VC0014	recF
NC_002505_KPS-14	+	10995	10	45	4	6	2	5	13.2868	2.56251	1.00861	2.54062	0.0110655	0.0199868	VC0014	recF
NC_002505_KPS-14	+	11079	49	16	36	2	1	3	19.31	4.40035	0.854804	5.14779	2.63572e-07	2.48657e-06	VC0014	recF
NC_002505_KPS-14	+	11088	41	13	12	2	4	0	12.923	3.69732	1.00438	3.68121	0.000232131	0.000715376	-	-
NC_002505_KPS-14	+	11110	67	10	61	0	4	5	26.3611	4.28174	0.934026	4.58418	4.55775e-06	2.72876e-05	VC0015	gyrB
NC_002505_KPS-14	+	11114	31	5	14	3	6	6	11.214	2.03948	0.854807	2.3859	0.0170373	0.0292318	VC0015	gyrB
NC_002505_KPS-14	+	11120	22	6	17	1	6	2	9.57874	2.60433	0.943891	2.75914	0.00579532	0.0113382	VC0015	gyrB
NC_002505_KPS-14	+	11264	16	16	22	5	3	1	11.487	2.87713	0.826061	3.48295	0.000495922	0.00135806	VC0015	gyrB
NC_002505_KPS-14	+	11308	18	13	25	1	0	2	10.8047	4.58025	1.08705	4.21349	2.51456e-05	0.00011259	VC0015	gyrB
NC_002505_KPS-14	+	11642	49	48	37	6	9	7	28.2364	2.93282	0.556511	5.27001	1.36413e-07	1.41974e-06	VC0015	gyrB
NC_002505_KPS-14	+	12008	26	13	21	2	1	1	11.6444	4.21616	0.967858	4.35618	1.32353e-05	6.62175e-05	VC0015	gyrB
NC_002505_KPS-14	+	12127	27	16	20	1	6	4	13.236	2.84207	0.773896	3.67242	0.000240261	0.000736142	VC0015	gyrB
NC_002505_KPS-14	+	12362	48	14	40	0	0	1	18.7566	6.87197	1.36187	5.04599	4.51182e-07	3.93551e-06	VC0015	gyrB
NC_002505_KPS-14	+	12365	29	7	35	1	3	4	14.1456	3.48824	0.904023	3.85857	0.000114052	0.000394301	VC0015	gyrB
NC_002505_KPS-14	+	12367	51	9	43	4	11	8	22.142	2.46237	0.76462	3.22038	0.00128022	0.00304937	VC0015	gyrB
NC_002505_KPS-14	+	12657	37	34	31	5	0	2	20.0309	4.18576	0.811541	5.15779	2.49886e-07	2.3772e-06	VC0015	gyrB
NC_002505_KPS-14	+	12739	26	13	18	3	3	8	12.4428	2.38339	0.736965	3.23406	0.00122045	0.0029258	VC0015	gyrB
NC_002505_KPS-14	+	13127	37	25	36	8	9	12	22.3755	2.09312	0.546227	3.83196	0.000127128	0.000431941	VC0015	gyrB
NC_002505_KPS-14	+	13819	26	4	54	3	9	6	18.1308	2.53312	0.914923	2.76867	0.00562849	0.0110523	-	-
NC_002505_KPS-14	+	13826	69	30	164	21	16	27	58.0686	2.37943	0.64574	3.68482	0.000228868	0.00070683	-	-
NC_002505_KPS-14	+	14018	13	12	35	1	1	2	11.7724	4.26194	1.03082	4.1345	3.55733e-05	0.00015011	-	VC0015a
NC_002505_KPS-14	+	14019	12	2	30	0	0	0	8.11497	6.6335	1.62371	4.0854	4.40009e-05	0.000179234	-	VC0015a
NC_002505_KPS-14	+	14048	8	5	28	1	7	1	9.04012	2.46643	1.09612	2.25014	0.0244398	0.0401637	-	VC0015a
NC_002505_KPS-14	+	14312	16	15	74	11	5	9	23.3457	2.40485	0.801821	2.99924	0.00270656	0.00583025	-	VC0015a
NC_002505_KPS-14	+	14313	20	10	56	6	9	11	19.7584	2.07067	0.762922	2.71413	0.00664503	0.0127869	-	VC0015a
NC_002505_KPS-14	+	14392	37	5	72	8	4	9	24.0119	2.77005	0.873862	3.1699	0.00152493	0.00354133	-	VC0017
NC_002505_KPS-14	+	14396	15	3	40	1	1	3	11.4104	3.90153	1.1328	3.44414	0.000572873	0.00153628	-	VC0017
NC_002505_KPS-14	+	14682	66	249	42	27	26	28	80.5286	2.50683	0.695652	3.60357	0.000313874	0.000922677	-	-
NC_002505_KPS-14	+	14767	41	241	42	38	46	58	83.3436	1.58663	0.728613	2.1776	0.0294357	0.0473091	-	-
NC_002505_KPS-14	+	16052	1	21	2	1	0	2	5.10363	3.4533	1.55393	2.2223	0.0262632	0.0427747	-	-
NC_002505_KPS-14	+	16663	37	24	18	10	9	11	18.9993	1.71757	0.58863	2.91791	0.00352381	0.00733635	-	-
NC_002505_KPS-14	+	20650	16	70	16	1	2	1	20.1997	5.03606	1.06551	4.72642	2.28514e-06	1.53907e-05	-	VC0022
NC_002505_KPS-14	+	21045	26	17	20	4	8	3	13.9393	2.3637	0.714434	3.3085	0.000937979	0.00233757	-	VC0023
NC_002505_KPS-14	+	29815	10	24	9	2	1	7	9.52732	2.53234	0.934871	2.70876	0.00675352	0.0129667	-	-
NC_002505_KPS-14	+	31224	1	21	1	0	0	1	4.62811	4.81509	1.87298	2.57082	0.0101458	0.018525	-	VC0032
NC_002505_KPS-14	+	31650	7	22	8	2	0	2	7.63447	3.59268	1.14215	3.14555	0.00165773	0.00380915	-	-
NC_002505_KPS-14	+	31651	19	40	25	4	6	11	18.8785	2.38872	0.670034	3.56508	0.000363748	0.00104467	-	-
NC_002505_KPS-14	+	31652	23	71	34	11	7	15	29.1744	2.3405	0.651038	3.59504	0.000324347	0.000949427	-	-
NC_002505_KPS-14	+	32944	13	55	14	10	10	9	20.0871	1.85653	0.768837	2.41472	0.0157472	0.0272723	-	-
NC_002505_KPS-14	+	33646	11	30	3	2	0	1	8.84494	4.23418	1.29774	3.26273	0.00110343	0.00268517	-	-
NC_002505_KPS-14	+	34923	21	61	10	9	5	15	21.7067	2.07204	0.799373	2.59208	0.00953965	0.0175432	-	-
NC_002505_KPS-14	+	35015	2	59	10	6	4	6	16.2241	2.54776	1.06474	2.39284	0.0167185	0.028751	-	-
NC_002505_KPS-14	+	37880	257	174	243	9	22	7	130.545	4.43227	0.536818	8.25655	1.49941e-16	1.27612e-14	-	VC0040
NC_002505_KPS-14	+	37919	426	75	420	66	119	133	214.263	1.85398	0.614593	3.0166	0.00255627	0.00554881	-	VC0040
NC_002505_KPS-14	+	37920	229	42	191	16	49	18	96.7121	2.73315	0.700686	3.90067	9.59263e-05	0.000341484	-	VC0040
NC_002505_KPS-14	+	37921	517	66	521	13	137	9	225.995	3.0016	0.981749	3.0574	0.00223263	0.00493525	-	VC0040
NC_002505_KPS-14	+	37922	45	3	24	0	7	0	14.055	3.56529	1.30183	2.73868	0.00616866	0.0119722	-	VC0040
NC_002505_KPS-14	+	38310	48	27	48	5	6	4	24.9673	3.34274	0.630413	5.30245	1.14256e-07	1.21708e-06	-	VC0040
NC_002505_KPS-14	+	38311	26	14	16	1	0	3	10.8328	4.16852	1.01089	4.12361	3.72985e-05	0.000156213	-	VC0040
NC_002505_KPS-14	+	38403	29	43	33	2	1	0	20.2084	5.45231	1.00914	5.4029	6.55711e-08	7.5625e-07	-	VC0040
NC_002505_KPS-14	+	38408	9	10	20	0	1	1	7.57844	4.63959	1.30068	3.56705	0.000361029	0.00103833	-	VC0040
NC_002505_KPS-14	+	38459	28	44	19	0	0	3	17.4971	5.32942	1.09444	4.86953	1.11865e-06	8.48845e-06	-	VC0040
NC_002505_KPS-14	+	38460	11	52	17	3	1	1	16.1317	4.34905	1.02303	4.25113	2.12691e-05	9.79599e-05	-	VC0040
NC_002505_KPS-14	+	41997	9	37	10	2	3	5	12.172	2.88601	0.917382	3.14592	0.00165568	0.00380534	-	-
NC_002505_KPS-14	+	42007	9	30	6	0	0	2	8.86064	4.93096	1.41729	3.47915	0.000502999	0.00137475	-	-
NC_002505_KPS-14	+	45706	21	10	21	1	0	2	9.98536	4.46482	1.10531	4.03945	5.35774e-05	0.000210865	-	VC0047
NC_002505_KPS-14	+	45881	2	24	0	1	0	0	5.24276	4.99087	1.96808	2.5359	0.0112157	0.0202315	-	VC0047
NC_002505_KPS-14	+	45993	2	20	1	0	0	0	4.47954	5.77019	1.88949	3.05383	0.00225937	0.00498619	-	VC0047
NC_002505_KPS-14	+	47102	79	374	85	31	55	66	125.565	2.22465	0.679147	3.27565	0.0010542	0.00258202	-	VC0048
NC_002505_KPS-14	+	47170	79	20	93	18	19	27	44.509	1.91099	0.612021	3.12243	0.00179367	0.00407841	-	VC0048
NC_002505_KPS-14	+	47409	50	28	35	12	7	23	26.7564	1.79141	0.566873	3.16016	0.00157683	0.00364579	-	VC0049
NC_002505_KPS-14	+	47602	58	42	74	12	20	15	39.3004	2.2064	0.504753	4.37125	1.23538e-05	6.26082e-05	-	VC0049
NC_002505_KPS-14	+	47605	21	6	5	2	0	4	6.60782	2.76857	1.13374	2.44197	0.0146074	0.0255351	-	VC0049
NC_002505_KPS-14	+	47651	38	28	51	1	2	8	23.1998	3.80288	0.743122	5.11744	3.09707e-07	2.85149e-06	-	VC0049
NC_002505_KPS-14	+	47658	69	50	88	19	34	21	49.5473	1.79064	0.494669	3.61987	0.000294748	0.000874745	-	VC0049
NC_002505_KPS-14	+	47799	43	46	53	5	1	5	28.1075	4.04004	0.666756	6.05925	1.36754e-09	2.60376e-08	-	VC0050
NC_002505_KPS-14	+	47800	8	26	30	1	0	0	12.3122	6.25025	1.42345	4.39093	1.12869e-05	5.80546e-05	-	VC0050
NC_002505_KPS-14	+	47903	26	14	12	2	6	4	11.3284	2.42783	0.78683	3.08559	0.00203151	0.00454682	-	VC0050
NC_002505_KPS-14	+	48084	21	25	21	7	6	15	16.5082	1.63559	0.613836	2.66453	0.00770957	0.014563	-	VC0050
NC_002505_KPS-14	+	50120	43	43	42	10	16	14	29.7898	2.00994	0.497466	4.04035	5.33722e-05	0.000210157	-	VC0054
NC_002505_KPS-14	+	50124	13	24	10	7	6	6	11.7217	1.64452	0.734848	2.23791	0.0252272	0.0412779	-	VC0054
NC_002505_KPS-14	+	50561	15	42	2	2	0	1	11.7204	4.65936	1.33245	3.49683	0.000470821	0.00129875	-	VC0054
NC_002505_KPS-14	+	50578	9	54	12	1	2	4	15.4516	3.84355	1.01383	3.79112	0.000149968	0.000496051	-	VC0054
NC_002505_KPS-14	+	50579	13	66	3	1	0	0	16.0036	6.63347	1.59354	4.16274	3.14451e-05	0.000135489	-	VC0054
NC_002505_KPS-14	+	50628	1	22	2	2	0	1	5.33733	3.44697	1.55225	2.22063	0.0263763	0.0429419	-	VC0054
NC_002505_KPS-14	+	50629	22	144	18	1	2	4	36.588	5.14538	1.01656	5.06158	4.15797e-07	3.66777e-06	-	VC0054
NC_002505_KPS-14	+	50647	15	22	10	2	0	0	9.15252	4.87006	1.28945	3.77684	0.00015883	0.00052082	-	VC0054
NC_002505_KPS-14	+	50655	6	92	4	2	8	6	22.2919	3.07838	1.13229	2.71871	0.00655373	0.0126301	-	VC0054
NC_002505_KPS-14	+	50656	1	31	0	0	0	2	6.53782	4.53549	1.96467	2.30852	0.0209704	0.0351058	-	VC0054
NC_002505_KPS-14	+	50814	24	15	30	1	7	5	14.678	2.7411	0.768978	3.56461	0.000364403	0.00104625	-	VC0055
NC_002505_KPS-14	+	50819	87	100	100	11	7	6	57.2989	3.89795	0.517408	7.53361	4.93555e-14	2.62379e-12	-	VC0055
NC_002505_KPS-14	+	50871	14	30	24	5	1	4	14.3317	3.1234	0.805177	3.87915	0.000104824	0.000367651	-	VC0055
NC_002505_KPS-14	+	51311	10	26	19	4	1	3	11.6199	3.13904	0.875661	3.58476	0.000337383	0.000981385	-	VC0055
NC_002505_KPS-14	+	51495	17	23	20	1	4	0	12.0514	3.88268	0.964492	4.02562	5.68256e-05	0.000221324	-	VC0055
NC_002505_KPS-14	+	51534	45	35	29	1	1	3	20.8834	4.7966	0.840945	5.70382	1.17153e-08	1.70526e-07	-	VC0055
NC_002505_KPS-14	+	51540	28	20	53	4	10	4	21.5169	2.7901	0.717324	3.8896	0.000100409	0.000354819	-	VC0055
NC_002505_KPS-14	+	51616	7	22	12	0	3	3	8.66553	3.16188	1.03307	3.06067	0.00220842	0.00488824	-	-
NC_002505_KPS-14	+	51826	4	21	4	3	0	1	6.20044	3.2107	1.30363	2.4629	0.0137819	0.0242717	VC0056	aroE
NC_002505_KPS-14	+	51827	36	60	22	10	9	18	27.5534	2.05177	0.610908	3.35855	0.000783513	0.00200637	VC0056	aroE
NC_002505_KPS-14	+	51828	14	40	11	4	3	7	14.3982	2.60777	0.821803	3.17323	0.00150751	0.00350607	VC0056	aroE
NC_002505_KPS-14	+	51954	16	26	10	5	2	5	11.5499	2.47151	0.803876	3.07449	0.00210863	0.00469499	VC0056	aroE
NC_002505_KPS-14	+	51994	9	42	4	5	4	2	12.3013	2.65555	1.0299	2.57846	0.00992414	0.0181655	VC0056	aroE
NC_002505_KPS-14	+	52311	7	37	10	0	0	2	10.6429	5.20107	1.4058	3.69971	0.000215843	0.000673017	VC0056	aroE
NC_002505_KPS-14	+	53467	102	83	132	63	37	18	77.3	1.68711	0.572918	2.94477	0.00323196	0.00681058	-	-
NC_002505_KPS-14	+	53501	21	9	9	3	2	5	8.55726	2.29967	0.856484	2.68501	0.0072527	0.0137972	-	VC0059
NC_002505_KPS-14	+	53507	23	7	7	2	0	1	7.15181	3.9193	1.21747	3.21923	0.00128535	0.00305934	-	VC0059
NC_002505_KPS-14	+	53511	31	15	28	3	2	1	14.5456	3.92018	0.853572	4.59268	4.37592e-06	2.63878e-05	-	VC0059
NC_002505_KPS-14	+	53567	32	16	11	0	0	0	10.7952	7.04672	1.41453	4.98168	6.30341e-07	5.2174e-06	-	VC0059
NC_002505_KPS-14	+	53591	8	36	9	5	4	7	12.5106	2.11765	0.867316	2.44161	0.0146219	0.0255593	-	VC0059
NC_002505_KPS-14	+	53592	391	1206	362	147	79	166	431.173	2.70478	0.580533	4.65913	3.17546e-06	2.02347e-05	-	VC0059
NC_002505_KPS-14	+	53593	9	37	10	2	2	1	11.5096	3.83296	1.04298	3.675	0.000237845	0.000730103	-	VC0059
NC_002505_KPS-14	+	53624	12	31	10	3	1	2	10.9775	3.49802	0.964047	3.62848	0.0002851	0.000850155	-	VC0059
NC_002505_KPS-14	+	53684	78	44	31	10	30	10	35.7556	1.88325	0.654832	2.87592	0.00402849	0.00824359	-	-
NC_002505_KPS-14	+	53686	56	17	15	4	20	8	20.774	1.72581	0.800794	2.15513	0.0311518	0.0497045	-	-
NC_002505_KPS-14	+	55380	7	21	3	2	1	4	6.91012	2.55461	1.09798	2.32665	0.0199838	0.0336285	-	-
NC_002505_KPS-14	+	55390	15315	18056	12920	4388	2852	6871	10684.1	2.09117	0.380374	5.49766	3.84855e-08	4.79312e-07	-	-
NC_002505_KPS-14	+	55391	79	236	95	35	12	32	89.7402	2.74872	0.620566	4.42937	9.45075e-06	5.01005e-05	-	-
NC_002505_KPS-14	+	55392	72	235	54	12	11	22	75.4826	3.40813	0.67258	5.06725	4.03596e-07	3.57388e-06	-	-
NC_002505_KPS-14	+	55395	24	102	33	0	0	1	30.6116	7.57824	1.39389	5.43675	5.42617e-08	6.44057e-07	-	-
NC_002505_KPS-14	+	55396	48	111	43	21	16	14	46.0404	2.31732	0.594143	3.90028	9.60798e-05	0.000341929	-	-
NC_002505_KPS-14	+	55401	480	1169	372	4	2	8	385.915	7.57442	0.691353	10.9559	6.22396e-28	2.99616e-25	-	-
NC_002505_KPS-14	+	55402	9	44	7	1	1	0	11.8792	5.25022	1.37519	3.81782	0.000134636	0.000453367	-	-
NC_002505_KPS-14	+	55406	74	109	57	1	1	3	45.7817	5.95338	0.824198	7.22324	5.07625e-13	2.21877e-11	-	-
NC_002505_KPS-14	+	55407	373	653	290	17	8	17	254.34	5.3287	0.527138	10.1087	5.05267e-24	1.39813e-21	-	-
NC_002505_KPS-14	+	55408	21	30	9	6	1	2	12.6476	3.05004	0.908629	3.35675	0.00078865	0.0020177	-	-
NC_002505_KPS-14	+	55414	13	44	16	3	1	2	14.8409	3.96673	0.944214	4.20109	2.65635e-05	0.000117833	-	-
NC_002505_KPS-14	+	55425	63	66	64	21	28	31	47.7756	1.61166	0.416244	3.8719	0.000107989	0.000376731	VCt001	tRNA-Ala-5
NC_002505_KPS-14	+	58972	70	206	66	9	5	10	68.715	4.20987	0.66484	6.33216	2.41753e-10	5.63849e-09	VCt002	tRNA-Asp-4
NC_002505_KPS-14	+	58973	24	45	19	7	6	11	20.0963	2.24643	0.652449	3.44307	0.000575145	0.00154143	VCt002	tRNA-Asp-4
NC_002505_KPS-14	+	58975	17	21	6	5	4	7	10.5585	1.81351	0.794359	2.28298	0.0224315	0.0372537	VCt002	tRNA-Asp-4
NC_002505_KPS-14	+	58976	112	242	120	11	6	12	94.0006	4.39725	0.566095	7.76769	7.99302e-15	4.91781e-13	VCt002	tRNA-Asp-4
NC_002505_KPS-14	+	59021	60	52	38	3	2	6	29.3992	4.12461	0.657238	6.27567	3.48128e-10	7.81222e-09	-	-
NC_002505_KPS-14	+	59666	14	21	11	2	6	2	10.1785	2.51781	0.851033	2.95854	0.00309103	0.00655109	VC0060	ccrB
NC_002505_KPS-14	+	59751	80	71	124	13	9	15	56.6397	3.23555	0.495582	6.52879	6.63047e-11	1.78796e-09	-	-
NC_002505_KPS-14	+	59762	165	76	181	16	14	19	84.9217	3.42921	0.491636	6.97509	3.0567e-12	1.13435e-10	-	-
NC_002505_KPS-14	+	59769	495	226	437	32	17	30	224.498	4.18975	0.458884	9.13029	6.83133e-20	1.02391e-17	-	-
NC_002505_KPS-14	+	59770	25	13	24	7	11	3	14.6928	1.83101	0.729629	2.50951	0.0120899	0.0216029	-	-
NC_002505_KPS-14	+	59775	986	670	1107	126	175	135	577.008	2.97044	0.373931	7.9438	1.96073e-15	1.3625e-13	-	-
NC_002505_KPS-14	+	59776	61	66	99	14	18	19	49.7541	2.48744	0.472434	5.26515	1.40075e-07	1.45225e-06	-	-
NC_002505_KPS-14	+	59778	93	98	109	7	10	9	59.8464	3.86335	0.483586	7.98896	1.36085e-15	9.70992e-14	-	-
NC_002505_KPS-14	+	59781	28	43	30	8	6	13	22.8767	2.27331	0.584376	3.89014	0.000100184	0.000354136	-	-
NC_002505_KPS-14	+	59782	3078	706	3136	630	1121	832	1649.85	1.71227	0.563871	3.03663	0.00239239	0.00523977	-	-
NC_002505_KPS-14	+	59783	221	195	235	14	17	9	127.175	4.32771	0.453058	9.55223	1.26935e-21	2.44615e-19	-	-
NC_002505_KPS-14	+	59784	1052	358	909	61	94	65	457.56	3.6841	0.487091	7.56348	3.92433e-14	2.12601e-12	-	-
NC_002505_KPS-14	+	59785	790	391	806	22	37	16	377.494	5.00384	0.505111	9.90643	3.90354e-23	9.57405e-21	-	-
NC_002505_KPS-14	+	59786	93	65	94	20	47	18	59.6747	1.85055	0.542117	3.41355	0.000641217	0.00169023	-	-
NC_002505_KPS-14	+	59788	874	565	909	104	170	262	511.227	2.49504	0.396842	6.28724	3.23163e-10	7.32355e-09	-	-
NC_002505_KPS-14	+	59789	1214	1373	1229	184	256	266	817.051	2.77491	0.316896	8.75654	2.01344e-18	2.35666e-16	-	-
NC_002505_KPS-14	+	59790	279	393	252	31	102	94	206.528	2.38657	0.503706	4.73802	2.15816e-06	1.46923e-05	-	-
NC_002505_KPS-14	+	59791	303	448	336	65	184	161	264.349	1.76236	0.472115	3.73291	0.000189284	0.000603773	-	-
NC_002505_KPS-14	+	59797	81	16	78	14	28	9	39.7808	2.02891	0.727287	2.7897	0.00527566	0.0104419	-	-
NC_002505_KPS-14	+	59799	36	11	37	7	11	5	18.9061	2.14619	0.717175	2.99256	0.00276648	0.00594129	-	-
NC_002505_KPS-14	+	66054	6	29	2	2	1	4	8.12555	2.82704	1.17429	2.40745	0.0160642	0.0277518	VC0066	thiH
NC_002505_KPS-14	+	69268	1216	127	1049	235	327	416	576.414	1.60476	0.669616	2.39654	0.0165506	0.0284964	-	-
NC_002505_KPS-14	+	69269	300	40	317	25	33	32	132.998	3.1656	0.676051	4.68249	2.83409e-06	1.84081e-05	-	-
NC_002505_KPS-14	+	69510	332	57	365	14	10	19	143.841	4.45625	0.667152	6.67952	2.39723e-11	7.19016e-10	-	VC0069
NC_002505_KPS-14	+	69511	228	47	250	29	21	43	109.373	2.83083	0.617158	4.58688	4.49929e-06	2.70065e-05	-	VC0069
NC_002505_KPS-14	+	69512	55	23	80	6	12	6	32.7752	3.01361	0.668971	4.50484	6.64231e-06	3.72722e-05	-	VC0069
NC_002505_KPS-14	+	69513	102	52	123	11	10	16	56.5006	3.24056	0.520473	6.22618	4.77946e-10	1.03262e-08	-	VC0069
NC_002505_KPS-14	+	69514	626	275	518	147	182	257	345.723	1.61183	0.399132	4.03835	5.38282e-05	0.00021169	-	VC0069
NC_002505_KPS-14	+	69516	1515	412	1512	86	182	144	690.083	3.36377	0.546889	6.15075	7.71179e-10	1.57322e-08	-	VC0069
NC_002505_KPS-14	+	69517	293	124	301	15	44	39	146.352	3.19951	0.530888	6.02672	1.67318e-09	3.11695e-08	-	VC0069
NC_002505_KPS-14	+	69518	77	78	61	4	5	5	42.3197	4.2832	0.574706	7.45285	9.13452e-14	4.59138e-12	-	VC0069
NC_002505_KPS-14	+	69519	268	197	150	6	15	10	118.318	4.62733	0.503761	9.18557	4.09371e-20	6.32924e-18	-	VC0069
NC_002505_KPS-14	+	69520	30549	8388	15941	535	1719	810	10431.8	4.428	0.590214	7.50236	6.26787e-14	3.2551e-12	-	VC0069
NC_002505_KPS-14	+	69521	4652	1225	2597	203	594	287	1703.4	3.23225	0.584197	5.53281	3.15148e-08	4.03486e-07	-	VC0069
NC_002505_KPS-14	+	69522	254	47	164	4	25	5	89.5743	4.01161	0.800294	5.01268	5.36775e-07	4.55796e-06	-	VC0069
NC_002505_KPS-14	+	69523	776	163	423	2	35	8	253.662	5.16298	0.836866	6.16941	6.85434e-10	1.41678e-08	-	VC0069
NC_002505_KPS-14	+	69524	727	132	318	5	38	11	220.65	4.69005	0.774684	6.05415	1.41165e-09	2.675e-08	-	VC0069
NC_002505_KPS-14	+	69525	444	82	239	3	30	3	144.044	4.62435	0.881119	5.24827	1.53538e-07	1.56847e-06	-	VC0069
NC_002505_KPS-14	+	69526	1060	218	636	11	94	25	366.986	4.12413	0.775791	5.31603	1.06055e-07	1.14201e-06	-	VC0069
NC_002505_KPS-14	+	69527	583	146	323	10	44	9	200.773	4.29561	0.721081	5.95719	2.56613e-09	4.5213e-08	-	VC0069
NC_002505_KPS-14	+	69528	59	10	25	1	5	2	18.1565	3.82717	0.919477	4.16233	3.15012e-05	0.000135669	-	VC0069
NC_002505_KPS-14	+	69531	43	26	24	2	7	6	19.3197	2.96076	0.678212	4.36555	1.26806e-05	6.39551e-05	-	VC0069
NC_002505_KPS-14	+	69535	126	45	119	15	29	13	61.8587	2.62158	0.586139	4.47263	7.72652e-06	4.23003e-05	-	VC0069
NC_002505_KPS-14	+	69536	30	11	15	2	6	4	11.9969	2.52648	0.79762	3.16752	0.00153743	0.00356629	-	VC0069
NC_002505_KPS-14	+	69571	7	19	22	1	4	3	10.2725	2.94492	0.91438	3.22067	0.00127892	0.00304653	-	VC0069
NC_002505_KPS-14	+	69572	184	108	100	5	29	3	77.9435	3.64615	0.765868	4.76081	1.92821e-06	1.33878e-05	-	VC0069
NC_002505_KPS-14	+	69573	512	403	302	12	62	15	239.086	4.04258	0.647714	6.2413	4.33953e-10	9.50496e-09	-	VC0069
NC_002505_KPS-14	+	69574	163	133	100	31	55	12	88.7144	2.26858	0.604844	3.75068	0.000176356	0.000568504	-	VC0069
NC_002505_KPS-14	+	69580	86	44	63	5	13	7	39.251	3.24979	0.578853	5.6142	1.97475e-08	2.68839e-07	-	VC0069
NC_002505_KPS-14	+	69582	205	60	133	0	22	5	76.6536	4.13897	0.910512	4.54576	5.47376e-06	3.17638e-05	-	VC0069
NC_002505_KPS-14	+	69583	248	110	184	2	21	2	103.363	4.68026	0.803272	5.82649	5.66042e-09	9.09166e-08	-	VC0069
NC_002505_KPS-14	+	69594	28	65	23	8	10	11	26.2885	2.36143	0.648062	3.64383	0.000268612	0.000808156	-	VC0069
NC_002505_KPS-14	+	69595	18	31	10	1	6	5	12.8744	2.6609	0.846954	3.14173	0.00167951	0.00385313	-	VC0069
NC_002505_KPS-14	+	69598	53	32	31	13	17	7	27.0661	1.92413	0.592411	3.24797	0.00116232	0.00280707	-	VC0069
NC_002505_KPS-14	+	69601	193	40	94	3	7	1	60.8887	5.13703	0.797692	6.43986	1.19583e-10	3.02722e-09	-	VC0069
NC_002505_KPS-14	+	69602	327	83	189	9	26	12	115.935	3.94201	0.626875	6.28836	3.20846e-10	7.27847e-09	-	VC0069
NC_002505_KPS-14	+	69603	52	13	31	3	6	8	19.8923	2.82338	0.727859	3.87901	0.000104881	0.000367806	-	VC0069
NC_002505_KPS-14	+	69604	113	23	46	1	4	3	34.0364	4.80406	0.837706	5.73478	9.76404e-09	1.45419e-07	-	VC0069
NC_002505_KPS-14	+	69605	29	6	20	1	1	8	11.3169	2.85747	0.974541	2.93212	0.00336658	0.0070539	-	VC0069
NC_002505_KPS-14	+	69606	48	7	31	1	3	6	16.9573	3.45002	0.901186	3.82831	0.000129024	0.000437447	-	VC0069
NC_002505_KPS-14	+	69679	29	8	47	0	4	1	16.2151	4.36627	1.05699	4.13085	3.6143e-05	0.000152135	-	VC0069
NC_002505_KPS-14	+	69712	21	12	12	2	3	2	9.33224	2.99423	0.865409	3.4599	0.000540367	0.0014612	-	VC0069
NC_002505_KPS-14	+	69733	8	4	23	0	2	3	7.19519	3.18325	1.16185	2.73982	0.00614722	0.0119375	-	VC0069
NC_002505_KPS-14	+	69805	36	5	38	4	2	12	16.8662	2.51534	0.894516	2.81196	0.0049241	0.00982953	-	VC0069
NC_002505_KPS-14	+	69817	39	11	75	2	3	5	24.4707	3.99124	0.855687	4.66437	3.09571e-06	1.98196e-05	-	VC0069
NC_002505_KPS-14	+	69922	82	19	82	4	0	4	34.5744	4.84445	0.868385	5.57868	2.42344e-08	3.20699e-07	-	VC0069
NC_002505_KPS-14	+	69943	29	12	60	3	4	7	20.6838	3.20494	0.788056	4.06689	4.76453e-05	0.000191449	-	VC0069
NC_002505_KPS-14	+	69988	14	2	23	1	3	2	8.04268	3.01077	1.1034	2.72863	0.00635971	0.0122963	-	VC0069
NC_002505_KPS-14	+	70045	32	6	24	2	4	8	13.2317	2.4966	0.8467	2.94862	0.00319195	0.00673732	-	VC0069
NC_002505_KPS-14	+	70116	50	6	42	9	16	7	22.6726	1.87266	0.802475	2.3336	0.0196167	0.0330793	-	VC0069
NC_002505_KPS-14	+	70259	1174	185	1154	29	63	67	480.794	4.30206	0.646622	6.65313	2.86916e-11	8.45293e-10	-	VC0069
NC_002505_KPS-14	+	70508	41	4	24	0	0	2	12.6883	5.46595	1.39268	3.92477	8.68122e-05	0.000314127	-	-
NC_002505_KPS-14	+	70564	29	56	31	14	9	14	27.3799	2.00168	0.576908	3.46967	0.000521098	0.00141676	-	-
NC_002505_KPS-14	+	70829	23	19	14	0	0	1	10.507	6.02659	1.36638	4.41063	1.03069e-05	5.37649e-05	-	VC0070
NC_002505_KPS-14	+	70945	17	20	19	0	0	0	10.4712	6.99914	1.37276	5.09858	3.42204e-07	3.10047e-06	-	-
NC_002505_KPS-14	+	70969	6	21	8	0	0	0	6.6873	6.34898	1.53987	4.12307	3.73849e-05	0.000156496	-	-
NC_002505_KPS-14	+	72058	9	11	20	0	3	1	8.09507	3.65189	1.09512	3.3347	0.000853925	0.0021584	-	VC0072
NC_002505_KPS-14	+	72128	13	15	26	3	3	5	11.696	2.65129	0.773562	3.42738	0.000609446	0.00161811	-	VC0072
NC_002505_KPS-14	+	72173	33	20	30	12	7	5	19.0163	2.0763	0.639698	3.24575	0.00117141	0.00282474	-	VC0072
NC_002505_KPS-14	+	72300	55	27	51	6	9	8	27.8942	2.84824	0.581221	4.90044	9.5623e-07	7.42933e-06	-	VC0072
NC_002505_KPS-14	+	72301	28	10	19	5	6	8	13.1911	1.90855	0.700092	2.72615	0.00640782	0.0123778	-	VC0072
NC_002505_KPS-14	+	72311	32	26	41	7	9	12	22.4774	2.16697	0.559518	3.87293	0.000107535	0.000375441	-	VC0072
NC_002505_KPS-14	+	72534	11	15	25	2	1	2	10.3011	3.69884	0.95012	3.89302	9.90038e-05	0.000350531	-	VC0072
NC_002505_KPS-14	+	73025	131	65	207	10	23	29	83.428	3.0534	0.569969	5.35714	8.45504e-08	9.39901e-07	-	VC0072
NC_002505_KPS-14	+	73026	69	67	128	28	25	51	64.1975	1.71481	0.4806	3.56806	0.000359638	0.00103502	-	VC0072
NC_002505_KPS-14	+	73232	36	20	49	0	2	1	19.8568	5.45619	1.03798	5.25652	1.46804e-07	1.51069e-06	-	VC0072
NC_002505_KPS-14	+	73233	23	28	52	2	9	6	21.8025	2.94022	0.715978	4.10657	4.01577e-05	0.000166042	-	VC0072
NC_002505_KPS-14	+	73548	13	51	12	3	2	8	16.3842	2.97701	0.889695	3.3461	0.000819575	0.00208412	-	VC0072
NC_002505_KPS-14	+	73653	20	38	9	11	6	5	16.0374	1.92198	0.783068	2.45443	0.0141109	0.0247775	-	VC0072
NC_002505_KPS-14	+	73690	19	33	25	2	2	6	15.9066	3.33222	0.760316	4.38267	1.17232e-05	5.99019e-05	-	VC0072
NC_002505_KPS-14	+	73708	12	10	22	2	3	1	9.12038	3.1806	0.93688	3.39488	0.000686586	0.00179284	-	VC0072
NC_002505_KPS-14	+	73821	33	33	66	11	10	13	29.6573	2.29717	0.565558	4.06177	4.87013e-05	0.000194857	-	-
NC_002505_KPS-14	+	73864	90	181	96	9	9	10	73.5394	4.06528	0.548035	7.41792	1.1897e-13	5.84115e-12	-	-
NC_002505_KPS-14	+	73873	13	24	7	1	5	2	9.52318	2.7922	0.956204	2.92009	0.00349935	0.00729288	-	-
NC_002505_KPS-14	+	74042	15	22	13	1	0	2	9.80461	4.43266	1.1024	4.02093	5.79692e-05	0.000225063	-	VC0073
NC_002505_KPS-14	+	74050	14	23	13	1	0	2	9.82752	4.43628	1.10912	3.99982	6.33902e-05	0.000242241	-	VC0073
NC_002505_KPS-14	+	74051	91	275	72	2	4	1	84.6788	6.30535	0.851691	7.40332	1.32817e-13	6.42746e-12	-	VC0073
NC_002505_KPS-14	+	74055	13	46	17	1	6	2	15.8971	3.42155	0.917954	3.72737	0.000193492	0.000615072	-	VC0073
NC_002505_KPS-14	+	74152	56	169	34	7	7	19	54.1014	3.39832	0.728798	4.66292	3.11755e-06	1.99358e-05	-	VC0073
NC_002505_KPS-14	+	74153	16	89	10	12	9	6	26.3506	2.43131	0.891247	2.72799	0.00637215	0.012318	-	VC0073
NC_002505_KPS-14	+	74158	4	25	1	1	0	0	5.9761	5.18497	1.74133	2.97759	0.00290524	0.00620263	-	VC0073
NC_002505_KPS-14	+	74187	11	28	2	0	1	2	8.22396	4.18551	1.3376	3.12911	0.00175335	0.00399942	-	VC0073
NC_002505_KPS-14	+	74264	8	20	10	3	4	5	8.96782	2.03036	0.834409	2.43329	0.0149623	0.0260879	-	VC0073
NC_002505_KPS-14	+	74381	6	25	3	2	4	0	7.50105	2.80037	1.23845	2.26119	0.0237476	0.0391784	-	VC0073
NC_002505_KPS-14	+	74563	7	31	11	0	0	1	9.52186	5.87791	1.48239	3.96515	7.33505e-05	0.000273533	-	VC0073
NC_002505_KPS-14	+	74564	28	119	29	3	0	2	34.5221	5.51764	1.00413	5.49492	3.90891e-08	4.85988e-07	-	VC0073
NC_002505_KPS-14	+	74625	29	45	49	0	2	1	23.5661	5.70644	1.00849	5.6584	1.52792e-08	2.15344e-07	-	VC0073
NC_002505_KPS-14	+	74632	19	33	15	1	0	2	13.0458	4.85941	1.08823	4.46541	7.99155e-06	4.34774e-05	-	VC0073
NC_002505_KPS-14	+	74633	20	31	20	1	2	2	14.0834	4.18043	0.888445	4.70533	2.53456e-06	1.67826e-05	-	VC0073
NC_002505_KPS-14	+	74719	12	22	11	2	0	2	9.06872	3.85898	1.05209	3.6679	0.000244549	0.000746752	-	-
NC_002505_KPS-14	+	74726	7	30	9	3	1	6	10.2241	2.62352	0.970023	2.7046	0.00683876	0.0131102	-	-
NC_002505_KPS-14	+	75035	13	21	3	1	2	5	8.07889	2.61297	1.0389	2.51513	0.0118989	0.0213028	-	VC0074
NC_002505_KPS-14	+	75104	37	26	24	3	7	10	18.9391	2.47391	0.632093	3.91383	9.08425e-05	0.000326292	-	VC0074
NC_002505_KPS-14	+	77208	69	13	94	8	13	12	37.1085	2.72529	0.723693	3.76581	0.000166012	0.000540519	-	VC0078
NC_002505_KPS-14	+	77299	18	21	37	5	1	3	15.568	3.41158	0.806288	4.23121	2.32436e-05	0.000105394	-	VC0078
NC_002505_KPS-14	+	77593	12	4	33	3	3	6	10.7921	2.38716	0.938931	2.54243	0.0110086	0.0198967	-	VC0079
NC_002505_KPS-14	+	77594	23	14	47	3	9	1	17.6378	2.95883	0.871827	3.39383	0.000689235	0.00179867	-	VC0079
NC_002505_KPS-14	+	77637	123	30	139	18	34	22	64.5477	2.26969	0.627466	3.61723	0.00029777	0.000882313	-	VC0079
NC_002505_KPS-14	+	77741	108	30	117	23	32	39	60.4334	1.76439	0.568647	3.10279	0.00191708	0.00432371	-	-
NC_002505_KPS-14	+	77811	16	198	24	21	20	18	55.1939	2.38704	0.882943	2.7035	0.00686137	0.0131483	-	-
NC_002505_KPS-14	+	78235	8	27	6	0	0	1	7.9692	5.61738	1.51612	3.70511	0.000211301	0.000661609	-	VC0080
NC_002505_KPS-14	+	78290	18	34	9	1	1	1	11.9769	4.69809	1.12126	4.19	2.78958e-05	0.000122669	-	VC0080
NC_002505_KPS-14	+	78911	2	39	2	1	2	0	8.89504	4.17667	1.50079	2.78299	0.00538603	0.0106319	-	VC0080
NC_002505_KPS-14	+	78979	13	30	14	3	0	0	11.2941	4.56127	1.16977	3.89929	9.64765e-05	0.000343182	-	VC0080
NC_002505_KPS-14	+	79696	2	52	2	0	0	1	11.1022	6.10343	1.75623	3.4753	0.000510281	0.00139145	-	-
NC_002505_KPS-14	+	79707	2	23	1	1	0	0	5.23324	4.98704	1.80672	2.76028	0.00577522	0.011305	-	-
NC_002505_KPS-14	+	80520	13	47	9	3	0	4	14.2104	3.71176	1.03889	3.57282	0.000353161	0.00101972	-	VC0082
NC_002505_KPS-14	+	80521	9	21	8	0	0	0	7.21009	6.45842	1.49536	4.31899	1.56745e-05	7.61548e-05	-	VC0082
NC_002505_KPS-14	+	80673	9	37	6	2	1	2	10.7249	3.75883	1.09273	3.43984	0.000582048	0.00155701	-	VC0082
NC_002505_KPS-14	+	80697	8	27	11	1	0	2	9.19532	4.34016	1.18814	3.65292	0.000259275	0.000784813	-	VC0082
NC_002505_KPS-14	+	80698	9	34	4	0	0	0	9.02267	6.78209	1.58804	4.27072	1.94839e-05	9.11133e-05	-	VC0082
NC_002505_KPS-14	+	81091	32	34	24	9	5	5	19.6705	2.55852	0.630268	4.05941	4.91961e-05	0.000196428	-	VC0082
NC_002505_KPS-14	+	81114	15	42	16	3	13	11	17.8429	1.81036	0.766303	2.36246	0.0181539	0.0309	-	VC0082
NC_002505_KPS-14	+	81236	21	33	15	7	7	9	16.3653	1.93636	0.652121	2.96932	0.0029846	0.00635234	-	VC0082
NC_002505_KPS-14	+	81294	8	22	7	0	0	1	7.17101	5.46255	1.49329	3.65807	0.000254126	0.00077148	-	VC0082
NC_002505_KPS-14	+	81314	22	95	18	5	2	6	27.8269	3.77319	0.864218	4.36602	1.26531e-05	6.38466e-05	-	VC0082
NC_002505_KPS-14	+	81315	6	25	2	2	0	2	6.92581	3.4438	1.31622	2.61642	0.00888561	0.0164928	-	VC0082
NC_002505_KPS-14	+	81419	12	24	12	2	2	0	9.71883	3.89363	1.0503	3.70716	0.000209594	0.000657234	-	VC0082
NC_002505_KPS-14	+	81622	29	46	26	18	8	15	25.0847	1.64422	0.586328	2.80427	0.00504303	0.0100376	-	-
NC_002505_KPS-14	+	81623	151	157	109	46	47	73	101.865	1.68372	0.378697	4.44609	8.74484e-06	4.69114e-05	-	-
NC_002505_KPS-14	+	81624	14	20	16	8	2	8	12.0078	1.832	0.739465	2.47747	0.0132319	0.0234082	-	-
NC_002505_KPS-14	+	81700	13	20	21	2	0	2	10.7251	4.11557	1.00253	4.10519	4.03977e-05	0.000166919	VC0083	ubiE
NC_002505_KPS-14	+	81896	17	29	30	7	8	4	17.2257	2.31506	0.677331	3.41791	0.000631037	0.00166703	VC0083	ubiE
NC_002505_KPS-14	+	82109	21	17	16	5	3	4	11.8066	2.49333	0.725208	3.43808	0.000585846	0.00156552	VC0083	ubiE
NC_002505_KPS-14	+	82376	41	76	32	6	0	3	29.4845	4.39382	0.823763	5.33384	9.61572e-08	1.051e-06	VC0083	ubiE
NC_002505_KPS-14	+	82390	12	21	9	0	2	5	8.86833	3.00089	0.995071	3.01575	0.00256342	0.00556188	VC0083	ubiE
NC_002505_KPS-14	+	82391	8	30	5	0	0	1	8.37306	5.68994	1.5387	3.69789	0.000217397	0.000676934	VC0083	ubiE
NC_002505_KPS-14	+	82791	34	27	35	7	3	1	19.5564	3.40674	0.745755	4.56817	4.91996e-06	2.90358e-05	-	VC0084
NC_002505_KPS-14	+	82810	59	37	57	3	4	0	29.3982	4.73233	0.774225	6.11235	9.81754e-10	1.95224e-08	-	VC0084
NC_002505_KPS-14	+	82996	27	25	24	2	2	3	15.1587	3.78262	0.774912	4.88136	1.05357e-06	8.06825e-06	-	VC0084
NC_002505_KPS-14	+	83060	147	127	146	11	1	20	82.511	4.10774	0.631258	6.50723	7.65503e-11	2.03225e-09	-	VC0084
NC_002505_KPS-14	+	83074	22	6	21	0	2	4	9.77955	3.39425	1.01704	3.33736	0.000845779	0.0021409	-	VC0084
NC_002505_KPS-14	+	83127	34	22	53	6	6	4	22.6423	3.07496	0.667697	4.60532	4.11834e-06	2.51138e-05	VC0085	ubiB
NC_002505_KPS-14	+	83194	19	15	29	4	2	3	13.0556	3.13431	0.783956	3.99807	6.38618e-05	0.00024369	VC0085	ubiB
NC_002505_KPS-14	+	83195	33	17	30	3	3	4	16.2005	3.32679	0.724759	4.59021	4.42799e-06	2.66497e-05	VC0085	ubiB
NC_002505_KPS-14	+	83317	39	47	36	2	3	8	24.6274	3.61116	0.661759	5.45692	4.84474e-08	5.84298e-07	VC0085	ubiB
NC_002505_KPS-14	+	83398	20	17	26	2	0	2	12.2917	4.32397	0.970548	4.45519	8.38206e-06	4.52487e-05	VC0085	ubiB
NC_002505_KPS-14	+	83399	24	10	7	0	0	1	7.59318	5.55448	1.46358	3.79513	0.000147566	0.000489619	VC0085	ubiB
NC_002505_KPS-14	+	83772	54	34	62	10	6	6	31.0825	3.07581	0.582457	5.28076	1.2865e-07	1.34831e-06	VC0085	ubiB
NC_002505_KPS-14	+	83806	17	10	22	1	1	7	10.264	2.84998	0.909942	3.13205	0.00173591	0.00396584	VC0085	ubiB
NC_002505_KPS-14	+	83822	31	12	44	1	1	2	16.598	4.77957	0.989987	4.82791	1.37975e-06	1.01229e-05	VC0085	ubiB
NC_002505_KPS-14	+	84365	70	28	56	6	3	13	31.3135	3.16851	0.642262	4.93336	8.08284e-07	6.44126e-06	VC0085	ubiB
NC_002505_KPS-14	+	84451	42	20	39	3	0	6	19.8213	3.8553	0.807486	4.77444	1.80204e-06	1.26699e-05	VC0085	ubiB
NC_002505_KPS-14	+	84571	132	84	113	15	7	17	66.4566	3.41329	0.477794	7.14386	9.07479e-13	3.77389e-11	VC0085	ubiB
NC_002505_KPS-14	+	84572	190	148	187	17	23	19	106.2	3.47276	0.403565	8.6052	7.61829e-18	8.14003e-16	VC0085	ubiB
NC_002505_KPS-14	+	84573	45	26	38	6	7	15	24.0752	2.31961	0.575815	4.02839	5.61612e-05	0.000219249	VC0085	ubiB
NC_002505_KPS-14	+	84577	35	50	18	12	9	20	25.2326	1.70334	0.612754	2.77981	0.00543913	0.0107259	VC0085	ubiB
NC_002505_KPS-14	+	84630	103	50	84	19	14	19	51.2757	2.50371	0.478368	5.23385	1.66017e-07	1.67785e-06	VC0085	ubiB
NC_002505_KPS-14	+	84641	25	12	17	1	10	5	12.3005	2.06197	0.824777	2.50003	0.0124182	0.0221251	VC0085	ubiB
NC_002505_KPS-14	+	84941	12	46	10	6	7	6	15.8827	2.19828	0.824611	2.66584	0.00767956	0.0145121	VC0086	tatA
NC_002505_KPS-14	+	85034	223	103	210	10	22	20	106.225	3.68805	0.497823	7.40835	1.27878e-13	6.22471e-12	-	VC0087
NC_002505_KPS-14	+	85438	20	30	24	4	3	2	15.2832	3.36439	0.756854	4.44523	8.77984e-06	4.70517e-05	-	-
NC_002505_KPS-14	+	85439	32	35	40	10	3	15	23.9695	2.30889	0.61621	3.74692	0.000179016	0.000575788	-	-
NC_002505_KPS-14	+	85715	27	8	21	1	0	2	10.6366	4.56305	1.13006	4.03789	5.39348e-05	0.000212016	-	VC0088
NC_002505_KPS-14	+	85806	62	37	72	10	10	24	37.8456	2.32679	0.535782	4.3428	1.4068e-05	6.96537e-05	-	VC0088
NC_002505_KPS-14	+	85890	26	16	25	1	1	8	13.704	3.14985	0.843073	3.73615	0.000186858	0.000597149	-	VC0088
NC_002505_KPS-14	+	85917	48	23	30	4	1	5	19.9658	3.67172	0.735787	4.9902	6.03168e-07	5.02836e-06	-	VC0088
NC_002505_KPS-14	+	85980	69	44	75	3	8	16	38.5483	3.17644	0.592652	5.35971	8.33568e-08	9.28149e-07	-	VC0088
NC_002505_KPS-14	+	86873	24	2	42	3	3	3	13.8007	3.22234	1.02069	3.15703	0.00159384	0.00368054	-	VC0089
NC_002505_KPS-14	+	87544	42	2	82	0	2	1	23.5457	5.70433	1.31131	4.35011	1.3607e-05	6.77504e-05	-	VC0089
NC_002505_KPS-14	+	87545	97	7	231	7	14	10	66.259	3.73813	0.916785	4.07743	4.55363e-05	0.000184361	-	VC0089
NC_002505_KPS-14	+	87546	16	3	43	2	4	1	12.5376	3.4253	1.08106	3.16845	0.00153252	0.00355713	-	VC0089
NC_002505_KPS-14	+	87547	34	4	84	1	10	6	24.9897	3.16224	1.01526	3.1147	0.00184131	0.00417251	-	VC0089
NC_002505_KPS-14	+	87549	44	9	99	5	2	5	29.7782	3.99241	0.890789	4.48188	7.39871e-06	4.07641e-05	-	VC0089
NC_002505_KPS-14	+	87577	19	3	21	2	4	6	9.56046	2.18096	0.928575	2.34871	0.0188384	0.0319184	-	-
NC_002505_KPS-14	+	87655	5	5	22	0	1	0	6.14518	5.23079	1.56485	3.34269	0.000829713	0.00210623	-	-
NC_002505_KPS-14	+	87661	13	26	14	2	2	4	11.1654	3.10248	0.845491	3.66945	0.000243077	0.000743246	-	-
NC_002505_KPS-14	+	87766	23	1	32	0	2	0	10.5294	5.06926	1.51202	3.35264	0.000800434	0.00204291	-	-
NC_002505_KPS-14	+	87768	60	1	89	0	0	0	27.3537	8.38575	2.49695	3.3584	0.000783942	0.00200725	-	-
NC_002505_KPS-14	+	91804	29	24	23	5	1	9	16.2033	2.71543	0.719294	3.77513	0.000159922	0.000523693	-	VC0093
NC_002505_KPS-14	+	91905	12	21	6	0	0	1	7.48324	5.52663	1.47374	3.75007	0.000176783	0.000569597	-	VC0093
NC_002505_KPS-14	+	91968	21	6	12	5	0	1	8.03096	2.96124	1.10498	2.67991	0.00736427	0.0139861	-	VC0093
NC_002505_KPS-14	+	92393	12	33	17	4	5	8	14.2405	2.24944	0.743455	3.02565	0.00248095	0.00540752	-	VC0093
NC_002505_KPS-14	+	95043	27	22	18	1	10	9	15.311	2.09509	0.748193	2.80019	0.00510718	0.0101484	-	-
NC_002505_KPS-14	+	95180	15	12	48	1	9	4	16.0896	2.742	0.902731	3.03745	0.00238588	0.00522764	-	VC0097
NC_002505_KPS-14	+	95349	25	26	25	5	4	4	16.1268	2.87464	0.665994	4.31631	1.58658e-05	7.68824e-05	-	VC0097
NC_002505_KPS-14	+	95609	4	21	1	0	0	0	5.02523	5.93671	1.81035	3.27932	0.00104057	0.00255374	-	-
NC_002505_KPS-14	+	100774	21	6	25	0	0	2	9.78509	5.0732	1.33986	3.78637	0.000152863	0.00050451	-	-
NC_002505_KPS-14	+	101328	43	9	49	1	8	1	20.0283	3.59097	0.962437	3.73112	0.000190632	0.000607484	-	VC0105
NC_002505_KPS-14	+	101329	26	9	16	3	4	4	10.9359	2.52348	0.793703	3.17938	0.0014759	0.00344191	-	VC0105
NC_002505_KPS-14	+	101728	4	4	23	1	2	1	6.409	3.27746	1.22579	2.67375	0.00750083	0.0142144	-	VC0105
NC_002505_KPS-14	+	101771	15	7	36	1	0	1	11.0374	5.19932	1.31807	3.94465	7.99154e-05	0.000293771	-	VC0105
NC_002505_KPS-14	+	102578	74	48	88	4	11	13	42.9122	3.25569	0.557528	5.83952	5.23525e-09	8.47993e-08	-	-
NC_002505_KPS-14	+	102579	33	29	42	5	6	8	22.1245	2.79625	0.591043	4.73104	2.23368e-06	1.51186e-05	-	-
NC_002505_KPS-14	+	103831	22	25	14	6	10	9	15.0916	1.62315	0.639525	2.53806	0.0111469	0.020118	-	VC0108
NC_002505_KPS-14	+	104577	12	13	25	4	4	7	11.513	2.096	0.746037	2.80951	0.00496173	0.00989678	-	VC0108
NC_002505_KPS-14	+	105031	8	19	22	1	3	2	10.1613	3.38114	0.942355	3.58797	0.000333265	0.000971004	-	VC0108
NC_002505_KPS-14	+	105764	23	16	20	5	2	0	12.0462	3.33943	0.910261	3.66866	0.000243829	0.000745118	-	VC0108
NC_002505_KPS-14	+	105770	34	25	46	6	4	15	22.9832	2.45216	0.631965	3.88022	0.000104364	0.000366301	-	VC0108
NC_002505_KPS-14	+	107156	28	22	13	5	3	3	13.3237	2.82762	0.757327	3.73368	0.000188705	0.000602072	-	-
NC_002505_KPS-14	+	108264	8	34	12	7	4	8	13.1293	1.88871	0.818495	2.30753	0.0210251	0.0351892	-	VC0113
NC_002505_KPS-14	+	108532	5	29	2	1	1	2	7.53775	3.57878	1.28788	2.77881	0.00545582	0.0107529	-	VC0113
NC_002505_KPS-14	+	108650	30	84	29	5	8	7	30.2004	3.19904	0.696846	4.59075	4.41664e-06	2.65903e-05	-	VC0113
NC_002505_KPS-14	+	108718	27	24	22	2	0	1	14.0155	4.93578	1.03039	4.79022	1.666e-06	1.18681e-05	-	VC0113
NC_002505_KPS-14	+	108719	40	60	35	9	11	17	30.7215	2.23445	0.539881	4.13877	3.49169e-05	0.000147781	-	VC0113
NC_002505_KPS-14	+	108720	11	25	3	3	1	4	8.55804	2.67142	1.04566	2.55476	0.010626	0.0192907	-	VC0113
NC_002505_KPS-14	+	108878	22	50	13	5	1	4	17.605	3.451	0.860726	4.0094	6.08721e-05	0.000234202	-	VC0113
NC_002505_KPS-14	+	109045	22	63	31	11	1	6	24.7704	3.03817	0.804283	3.77749	0.000158414	0.000519718	-	VC0114
NC_002505_KPS-14	+	109319	7	37	4	0	1	0	9.42539	5.85811	1.58178	3.70348	0.000212659	0.00066493	-	VC0114
NC_002505_KPS-14	+	109395	4	59	16	7	1	12	18.1355	2.43563	1.03409	2.35534	0.0185056	0.0314242	-	VC0114
NC_002505_KPS-14	+	109464	13	41	23	5	10	19	19.4613	1.5948	0.71341	2.23546	0.0253874	0.0415111	-	VC0114
NC_002505_KPS-14	+	109851	11	31	17	3	4	6	13.0987	2.5619	0.782226	3.27514	0.00105611	0.00258598	-	VC0115
NC_002505_KPS-14	+	110396	21	20	33	6	8	11	17.4287	1.91726	0.612644	3.12948	0.00175115	0.00399519	-	VC0116
NC_002505_KPS-14	+	111749	3	42	11	0	0	0	10.868	7.05046	1.61176	4.37439	1.21772e-05	6.18455e-05	-	-
NC_002505_KPS-14	+	112199	6	28	4	2	1	1	7.92668	3.60569	1.20476	2.99288	0.00276363	0.00593588	-	-
NC_002505_KPS-14	+	112308	1	20	2	0	0	0	4.49293	5.77421	1.88958	3.05581	0.00224451	0.00495775	-	-
NC_002505_KPS-14	+	113920	1	21	3	0	0	1	5.00341	4.93038	1.77304	2.78075	0.00542331	0.0106979	-	-
NC_002505_KPS-14	+	115733	108	84	104	30	38	52	72.3685	1.64878	0.381253	4.32464	1.52781e-05	7.45574e-05	-	-
NC_002505_KPS-14	+	115886	119	15	210	13	19	29	71.889	2.84125	0.775495	3.66379	0.000248512	0.000756998	-	-
NC_002505_KPS-14	+	115889	155	38	262	42	56	66	107.719	1.79862	0.631646	2.84751	0.00440627	0.00891272	-	-
NC_002505_KPS-14	+	115898	18	6	22	3	3	6	10.1678	2.28341	0.833567	2.73932	0.00615666	0.0119532	-	-
NC_002505_KPS-14	+	116060	24	31	18	9	11	10	18.1457	1.61597	0.594298	2.71913	0.00654532	0.0126154	VC0122	cyaA
NC_002505_KPS-14	+	116205	105	87	83	1	2	8	52.513	5.02251	0.647251	7.75975	8.50987e-15	5.22092e-13	VC0122	cyaA
NC_002505_KPS-14	+	116242	16	9	23	2	5	5	10.63	2.33768	0.799301	2.92465	0.0034484	0.00720241	VC0122	cyaA
NC_002505_KPS-14	+	116502	54	74	56	3	1	0	35.1553	5.84242	0.884922	6.60219	4.0513e-11	1.15449e-09	VC0122	cyaA
NC_002505_KPS-14	+	116586	103	135	92	2	2	1	62.6	6.37877	0.783352	8.14292	3.85863e-16	3.06582e-14	VC0122	cyaA
NC_002505_KPS-14	+	116587	11	24	17	0	0	1	9.96463	5.94541	1.3997	4.24763	2.16042e-05	9.92446e-05	VC0122	cyaA
NC_002505_KPS-14	+	116592	11	22	21	1	0	2	10.6088	4.55097	1.10712	4.11064	3.94568e-05	0.000163671	VC0122	cyaA
NC_002505_KPS-14	+	116601	40	28	49	2	8	3	23.6653	3.47729	0.70008	4.96699	6.79985e-07	5.56008e-06	VC0122	cyaA
NC_002505_KPS-14	+	116602	123	73	111	5	4	9	59.2375	4.43595	0.545869	8.1264	4.4221e-16	3.47064e-14	VC0122	cyaA
NC_002505_KPS-14	+	116685	102	102	124	11	17	30	69.4241	2.87249	0.454413	6.32131	2.59361e-10	6.01052e-09	VC0122	cyaA
NC_002505_KPS-14	+	116858	16	28	27	8	4	4	15.8146	2.47317	0.70651	3.50054	0.000464324	0.00128354	VC0122	cyaA
NC_002505_KPS-14	+	116954	20	15	26	11	7	5	14.8523	1.70148	0.674158	2.52386	0.0116075	0.0208431	VC0122	cyaA
NC_002505_KPS-14	+	116959	60	44	78	11	13	13	39.2622	2.62459	0.500654	5.24232	1.58567e-07	1.61161e-06	VC0122	cyaA
NC_002505_KPS-14	+	117725	15	20	16	2	0	6	10.6381	3.08237	0.911297	3.3824	0.000718556	0.00186414	VC0122	cyaA
NC_002505_KPS-14	+	117726	17	38	37	2	3	5	18.8298	3.5787	0.759804	4.71004	2.47671e-06	1.64743e-05	VC0122	cyaA
NC_002505_KPS-14	+	117793	23	14	15	1	1	4	10.4077	3.47878	0.898854	3.87024	0.00010873	0.00037895	VC0122	cyaA
NC_002505_KPS-14	+	117801	109	115	127	35	34	38	81.3836	2.04641	0.376057	5.44176	5.27554e-08	6.28458e-07	VC0122	cyaA
NC_002505_KPS-14	+	117881	46	51	60	20	5	20	35.8866	2.15751	0.576603	3.74176	0.000182733	0.000585857	VC0122	cyaA
NC_002505_KPS-14	+	118016	117	114	126	12	5	15	71.1397	3.83372	0.483287	7.9326	2.14606e-15	1.47608e-13	VC0122	cyaA
NC_002505_KPS-14	+	118111	30	39	32	1	1	1	19.3698	5.41645	0.994898	5.44422	5.20315e-08	6.20932e-07	VC0122	cyaA
NC_002505_KPS-14	+	118119	129	133	98	26	20	27	77.8977	2.63652	0.409509	6.43824	1.20865e-10	3.05552e-09	VC0122	cyaA
NC_002505_KPS-14	+	119103	47	87	56	23	20	25	45.9193	1.83222	0.4889	3.74763	0.000178513	0.00057436	-	VC0124
NC_002505_KPS-14	+	119104	511	572	442	88	75	120	326.103	2.78292	0.333533	8.34378	7.19527e-17	6.44927e-15	-	VC0124
NC_002505_KPS-14	+	119156	31	79	21	4	3	3	26.424	4.06242	0.803301	5.05716	4.25552e-07	3.7417e-06	-	VC0124
NC_002505_KPS-14	+	119175	21	16	16	9	1	8	12.4415	1.89962	0.775228	2.45041	0.0142695	0.0250181	-	VC0124
NC_002505_KPS-14	+	119212	99	107	61	8	10	17	54.8268	3.29381	0.508361	6.47928	9.21615e-11	2.40818e-09	-	-
NC_002505_KPS-14	+	119226	41	48	40	15	7	16	29.6766	2.11267	0.528671	3.9962	6.43682e-05	0.000245205	-	-
NC_002505_KPS-14	+	119233	30	21	22	2	4	9	15.591	2.65365	0.697017	3.80716	0.000140572	0.000470297	-	VC0125
NC_002505_KPS-14	+	119317	43	48	32	11	5	5	26.1733	2.85962	0.616713	4.63688	3.53715e-06	2.21247e-05	-	VC0125
NC_002505_KPS-14	+	119323	15	34	10	8	7	10	14.8665	1.60286	0.726247	2.20705	0.0273107	0.0442648	-	VC0125
NC_002505_KPS-14	+	119437	15	19	21	0	2	1	10.7459	4.53923	1.07508	4.22224	2.41888e-05	0.000108979	-	VC0125
NC_002505_KPS-14	+	119462	25	23	11	5	0	5	12.3949	2.91489	0.88406	3.29716	0.000976687	0.00241862	-	VC0125
NC_002505_KPS-14	+	119594	16	26	20	2	5	4	13.2933	2.84332	0.75197	3.78116	0.000156097	0.00051346	-	VC0125
NC_002505_KPS-14	+	119595	34	55	40	5	6	16	28.0552	2.65505	0.605007	4.38847	1.14152e-05	5.86392e-05	-	VC0125
NC_002505_KPS-14	+	119716	41	53	33	7	3	19	27.7894	2.54228	0.652487	3.89628	9.76802e-05	0.00034666	-	VC0125
NC_002505_KPS-14	+	119717	62	83	72	23	11	39	51.0687	1.9587	0.51103	3.83284	0.000126671	0.000430738	-	VC0125
NC_002505_KPS-14	+	119718	22	23	16	3	6	8	13.8214	2.20025	0.679584	3.23764	0.00120521	0.00289453	-	VC0125
NC_002505_KPS-14	+	119792	48	27	41	13	13	12	27.0749	1.91944	0.524379	3.6604	0.000251818	0.000765485	-	VC0125
NC_002505_KPS-14	+	119892	37	19	44	14	8	12	23.5071	1.87351	0.590988	3.17014	0.00152367	0.00353879	-	VC0125
NC_002505_KPS-14	+	119893	45	27	46	12	10	13	26.9746	2.07786	0.527727	3.93738	8.23752e-05	0.00030109	-	VC0125
NC_002505_KPS-14	+	119896	53	23	52	8	7	3	26.3212	3.106	0.668518	4.64609	3.38281e-06	2.13126e-05	-	VC0125
NC_002505_KPS-14	+	119916	48	44	48	2	3	9	27.9818	3.70053	0.638173	5.79863	6.68571e-09	1.05267e-07	-	VC0125
NC_002505_KPS-14	+	119917	24	16	25	1	4	5	13.4577	3.05102	0.765639	3.98493	6.75008e-05	0.00025505	-	VC0125
NC_002505_KPS-14	+	120005	46	46	53	5	7	2	29.2117	3.67348	0.637828	5.75936	8.44325e-09	1.28316e-07	-	VC0125
NC_002505_KPS-14	+	120046	12	12	22	7	6	5	11.3076	1.67046	0.723936	2.30747	0.0210288	0.0351926	-	VC0125
NC_002505_KPS-14	+	120105	56	32	70	3	2	7	30.8893	4.07811	0.679261	6.00375	1.92806e-09	3.53023e-08	-	VC0125
NC_002505_KPS-14	+	120161	67	56	49	18	3	21	37.9496	2.39455	0.618591	3.87097	0.000108402	0.000378001	-	VC0125
NC_002505_KPS-14	+	120234	29	4	22	0	0	2	10.2219	5.14584	1.3863	3.71193	0.000205687	0.000647411	-	VC0125
NC_002505_KPS-14	+	120235	26	11	38	3	1	4	14.9794	3.57212	0.852232	4.19148	2.77135e-05	0.000121997	-	VC0125
NC_002505_KPS-14	+	120272	14	29	12	2	3	11	12.5953	2.21148	0.828191	2.67026	0.00757935	0.0143441	-	VC0125
NC_002505_KPS-14	+	120331	47	25	51	1	2	2	23.4226	4.94901	0.846152	5.84884	4.95e-09	8.07298e-08	-	VC0125
NC_002505_KPS-14	+	120364	129	45	117	36	26	50	69.583	1.71048	0.506584	3.37651	0.000734129	0.00189865	-	VC0125
NC_002505_KPS-14	+	120370	42	11	35	11	5	17	20.7748	1.75971	0.695487	2.53018	0.0114004	0.0205192	-	VC0125
NC_002505_KPS-14	+	120418	86	20	61	12	19	30	39.1279	1.79147	0.616601	2.90539	0.0036679	0.00759763	-	VC0125
NC_002505_KPS-14	+	120464	65	16	78	10	13	8	33.8222	2.64176	0.686061	3.85062	0.000117818	0.000405324	-	VC0125
NC_002505_KPS-14	+	120470	65	16	63	7	10	14	30.7957	2.54574	0.657953	3.86918	0.000109203	0.000380317	-	VC0125
NC_002505_KPS-14	+	120485	206	51	165	28	15	33	88.0003	2.79379	0.57798	4.83372	1.34005e-06	9.87394e-06	-	-
NC_002505_KPS-14	+	120487	55	21	56	3	5	4	26.0212	3.77134	0.701798	5.37383	7.70803e-08	8.67662e-07	-	-
NC_002505_KPS-14	+	120616	13	11	22	0	1	1	8.84795	4.87097	1.26438	3.85245	0.00011694	0.00040279	VC0126	dapF
NC_002505_KPS-14	+	120622	81	35	66	3	5	10	35.9429	3.68939	0.621444	5.93681	2.90626e-09	5.05374e-08	VC0126	dapF
NC_002505_KPS-14	+	120623	18	9	22	2	0	4	9.86659	3.39877	0.968058	3.51092	0.000446567	0.00124239	VC0126	dapF
NC_002505_KPS-14	+	120669	47	17	41	2	4	7	21.0788	3.35984	0.72089	4.66067	3.15174e-06	2.01139e-05	VC0126	dapF
NC_002505_KPS-14	+	120670	29	4	20	4	5	1	11.1684	2.64546	0.966777	2.73637	0.00621207	0.012048	VC0126	dapF
NC_002505_KPS-14	+	120834	12	10	22	2	0	5	9.14386	3.04733	0.977695	3.11685	0.00182793	0.00414639	VC0126	dapF
NC_002505_KPS-14	+	120876	37	17	45	0	0	0	18.2438	7.80249	1.35335	5.7653	8.15138e-09	1.24525e-07	VC0126	dapF
NC_002505_KPS-14	+	120881	20	12	16	2	7	0	10.2962	2.66334	0.97472	2.73241	0.00628724	0.0121752	VC0126	dapF
NC_002505_KPS-14	+	120917	23	14	34	8	5	9	16.3757	2.02583	0.661066	3.06449	0.00218043	0.00483391	VC0126	dapF
NC_002505_KPS-14	+	121075	51	25	59	16	9	15	30.8057	2.07589	0.56264	3.68955	0.000224654	0.000696045	VC0126	dapF
NC_002505_KPS-14	+	121107	25	12	23	7	4	8	13.8182	1.98899	0.680533	2.92269	0.00347018	0.00724159	VC0126	dapF
NC_002505_KPS-14	+	121195	137	61	143	21	15	45	74.1923	2.44395	0.526982	4.63764	3.52402e-06	2.20567e-05	VC0126	dapF
NC_002505_KPS-14	+	121313	24	6	26	0	0	1	10.3699	6.00938	1.44042	4.17197	3.01973e-05	0.000131084	VC0126	dapF
NC_002505_KPS-14	+	121348	23	5	18	3	1	1	9.14355	3.48086	1.03606	3.35971	0.00078023	0.00199934	-	VC0127
NC_002505_KPS-14	+	121405	42	7	23	1	3	2	13.9078	3.87797	0.962766	4.02795	5.62663e-05	0.000219526	-	VC0127
NC_002505_KPS-14	+	121406	100	47	127	13	18	26	58.7758	2.60946	0.523903	4.98081	6.33183e-07	5.23571e-06	-	VC0127
NC_002505_KPS-14	+	121436	15	9	22	0	0	1	8.6424	5.74135	1.41475	4.0582	4.94532e-05	0.000197273	-	VC0127
NC_002505_KPS-14	+	121884	23	18	41	6	5	3	17.3995	2.85363	0.718847	3.96972	7.1956e-05	0.00026903	-	VC0127
NC_002505_KPS-14	+	122294	34	30	20	14	6	15	20.7071	1.60561	0.593192	2.70673	0.00679504	0.0130341	VC0128	xerC
NC_002505_KPS-14	+	122489	22	13	15	0	1	1	9.49709	4.97772	1.23734	4.02293	5.74796e-05	0.000223508	VC0128	xerC
NC_002505_KPS-14	+	122572	23	34	28	3	0	0	16.4525	5.13909	1.05932	4.85132	1.2264e-06	9.16449e-06	VC0128	xerC
NC_002505_KPS-14	+	123135	8	21	9	0	1	0	7.38321	5.49864	1.46868	3.74394	0.000181156	0.000581631	-	VC0129
NC_002505_KPS-14	+	123545	26	38	39	0	4	3	20.3575	4.23631	0.811287	5.22171	1.77277e-07	1.77272e-06	-	VC0129
NC_002505_KPS-14	+	123582	25	16	20	0	2	3	11.9607	3.96294	0.92108	4.3025	1.68885e-05	8.09196e-05	-	VC0129
NC_002505_KPS-14	+	123775	16	21	8	3	5	10	10.9719	1.70709	0.776474	2.19852	0.0279123	0.0451179	-	VC0130
NC_002505_KPS-14	+	123875	6	22	6	2	1	4	7.49598	2.68786	1.04147	2.58082	0.00985653	0.018057	-	VC0130
NC_002505_KPS-14	+	124138	9	26	17	1	0	0	10.047	5.95165	1.42114	4.18795	2.81483e-05	0.000123615	-	VC0130
NC_002505_KPS-14	+	124430	16	25	17	7	7	3	13.538	2.07598	0.722016	2.87525	0.00403705	0.00825832	-	VC0130
NC_002505_KPS-14	+	124442	29	9	23	0	2	0	11.4635	5.21678	1.27582	4.08896	4.33308e-05	0.000176952	-	VC0130
NC_002505_KPS-14	+	125299	20	5	29	2	8	8	12.5205	1.92236	0.859555	2.23646	0.0253216	0.0414166	-	VC0130
NC_002505_KPS-14	+	125997	19	12	21	2	3	0	10.4212	3.65772	0.965012	3.79034	0.000150442	0.000497448	-	VC0130
NC_002505_KPS-14	+	126037	12	30	6	3	3	5	10.7262	2.50517	0.898924	2.78686	0.0053222	0.0105205	-	VC0130
NC_002505_KPS-14	+	126129	21	12	15	1	3	3	9.85866	3.11018	0.859731	3.61762	0.000297321	0.000881216	-	VC0130
NC_002505_KPS-14	+	126617	24	36	15	2	2	2	14.9903	3.98719	0.863273	4.61869	3.8618e-06	2.38118e-05	-	-
NC_002505_KPS-14	+	126765	24	9	21	1	0	1	10.1853	5.08085	1.25688	4.04244	5.28976e-05	0.000208539	-	-
NC_002505_KPS-14	+	126770	27	24	22	1	1	2	14.1387	4.53525	0.926039	4.89747	9.70806e-07	7.52741e-06	-	-
NC_002505_KPS-14	+	126771	4	20	1	1	0	0	4.99026	4.91648	1.74407	2.81896	0.00481791	0.00964499	-	-
NC_002505_KPS-14	+	126893	12	26	9	1	1	3	9.6053	3.62313	1.00724	3.59707	0.000321816	0.000942837	-	-
NC_002505_KPS-14	+	127031	10	23	4	1	0	0	7.19028	5.45983	1.53148	3.56508	0.000363748	0.00104467	-	-
NC_002505_KPS-14	+	127066	11	52	5	1	0	0	13.2701	6.35951	1.54607	4.11334	3.89983e-05	0.00016208	-	-
NC_002505_KPS-14	+	127074	7	21	2	1	0	0	5.89786	5.16594	1.62824	3.17272	0.00151017	0.00351152	-	-
NC_002505_KPS-14	+	127295	2	27	0	1	0	0	5.83426	5.15007	1.95961	2.62811	0.00858595	0.0160046	-	-
NC_002505_KPS-14	+	128166	6	54	2	4	3	4	13.6986	2.8865	1.13641	2.54001	0.0110849	0.0200186	-	-
NC_002505_KPS-14	+	128312	16	76	10	5	5	6	22.0131	3.05385	0.885221	3.44982	0.000560964	0.00150914	-	-
NC_002505_KPS-14	+	128331	6	20	9	0	2	1	7.12292	3.90897	1.22211	3.19855	0.00138118	0.00325145	-	-
NC_002505_KPS-14	+	128613	9	28	2	0	0	0	7.46436	6.5088	1.65424	3.93462	8.33282e-05	0.000303863	-	-
NC_002505_KPS-14	+	129144	60	254	55	22	26	33	82.7256	2.57594	0.676242	3.80919	0.000139423	0.000467109	-	-
NC_002505_KPS-14	+	129145	9	71	8	8	3	13	20.479	2.31149	0.965868	2.39317	0.0167035	0.0287284	-	-
NC_002505_KPS-14	+	129654	13	53	6	0	0	1	13.9669	6.43818	1.51845	4.23997	2.23551e-05	0.000102082	-	-
NC_002505_KPS-14	+	130059	9	30	10	0	0	3	9.73691	4.48138	1.25204	3.57927	0.000344552	0.000998291	-	-
NC_002505_KPS-14	+	130821	26	10	11	2	2	3	9.5875	3.06627	0.893572	3.43147	0.000600315	0.00159828	VC0136	rhtB
NC_002505_KPS-14	+	130840	22	12	24	2	2	5	11.9756	3.04242	0.800679	3.7998	0.000144811	0.000482011	VC0136	rhtB
NC_002505_KPS-14	+	131128	35	43	29	5	5	3	22.0059	3.3605	0.657793	5.10875	3.24296e-07	2.96435e-06	VC0136	rhtB
NC_002505_KPS-14	+	131317	26	4	16	4	1	1	9.25606	3.19713	1.05293	3.03642	0.00239402	0.00524286	VC0136	rhtB
NC_002505_KPS-14	+	131322	22	24	20	7	3	3	14.3104	2.65513	0.718797	3.69385	0.000220884	0.000685921	VC0136	rhtB
NC_002505_KPS-14	+	131562	43	24	26	2	2	3	18.125	4.05977	0.775852	5.23266	1.67087e-07	1.6874e-06	-	VC0137
NC_002505_KPS-14	+	131607	36	11	35	2	1	1	15.6198	4.65877	0.988232	4.71425	2.42603e-06	1.61881e-05	-	VC0137
NC_002505_KPS-14	+	131655	24	10	9	0	0	4	8.34548	3.83207	1.17715	3.25537	0.00113243	0.00274466	-	VC0137
NC_002505_KPS-14	+	131741	245	98	204	8	17	27	107.703	3.74822	0.531084	7.05768	1.69303e-12	6.61982e-11	-	VC0137
NC_002505_KPS-14	+	131742	51	21	46	8	6	8	24.9211	2.73793	0.611719	4.4758	7.61267e-06	4.17493e-05	-	VC0137
NC_002505_KPS-14	+	131939	37	19	35	1	11	6	19.4349	2.65374	0.755424	3.51291	0.000443225	0.00123449	-	VC0137
NC_002505_KPS-14	+	131970	72	21	49	14	7	19	31.6588	2.15965	0.618267	3.49307	0.000477504	0.00131469	-	VC0137
NC_002505_KPS-14	+	132050	97	45	76	3	3	12	42.5111	3.97239	0.636276	6.24318	4.2877e-10	9.4067e-09	-	VC0137
NC_002505_KPS-14	+	132110	23	8	19	0	2	1	9.59584	4.37251	1.12926	3.87201	0.000107941	0.000376615	-	VC0137
NC_002505_KPS-14	+	132135	20	6	21	1	1	2	9.18216	3.88675	1.05342	3.68966	0.000224558	0.00069583	-	VC0137
NC_002505_KPS-14	+	132155	23	3	19	0	1	0	8.3246	5.68312	1.51494	3.75138	0.000175865	0.000567176	-	VC0137
NC_002505_KPS-14	+	132172	8	22	7	5	1	1	8.14173	2.71652	1.04645	2.59594	0.00943322	0.01737	-	VC0137
NC_002505_KPS-14	+	132310	51	32	48	8	6	26	29.7273	2.10839	0.606086	3.4787	0.000503858	0.00137681	-	VC0137
NC_002505_KPS-14	+	132311	82	35	80	2	0	4	37.0294	5.388	0.820554	6.56629	5.15844e-11	1.42812e-09	-	VC0137
NC_002505_KPS-14	+	132312	53	35	76	1	2	4	31.3825	4.90425	0.766008	6.40235	1.53006e-10	3.74847e-09	-	VC0137
NC_002505_KPS-14	+	132336	22	12	22	4	3	1	11.5817	3.09178	0.839231	3.68406	0.000229545	0.000708716	-	VC0137
NC_002505_KPS-14	+	132351	21	14	8	1	0	4	8.58592	3.49127	1.04933	3.32715	0.000877386	0.00220906	-	VC0137
NC_002505_KPS-14	+	132352	49	25	46	1	4	3	23.278	4.23125	0.750445	5.63832	1.71714e-08	2.38094e-07	-	VC0137
NC_002505_KPS-14	+	132482	24	17	32	0	2	4	14.3611	3.97635	0.88492	4.49345	7.00774e-06	3.89561e-05	-	VC0137
NC_002505_KPS-14	+	132485	11	14	21	8	3	6	11.1487	1.77195	0.750433	2.36123	0.0182144	0.0309911	-	VC0137
NC_002505_KPS-14	+	132525	24	8	23	1	1	6	11.1515	3.16563	0.926516	3.4167	0.000633854	0.00167324	-	VC0137
NC_002505_KPS-14	+	132535	35	41	29	1	0	1	19.9128	6.06222	1.16327	5.21137	1.87447e-07	1.8576e-06	-	VC0137
NC_002505_KPS-14	+	132536	31	33	26	0	0	4	17.2902	4.89284	0.978138	5.0022	5.66785e-07	4.77596e-06	-	VC0137
NC_002505_KPS-14	+	132592	115	62	113	5	10	12	57.3853	3.7628	0.529387	7.10784	1.17871e-12	4.77486e-11	-	VC0137
NC_002505_KPS-14	+	132603	66	33	55	6	5	4	30.6031	3.66269	0.618549	5.92143	3.19155e-09	5.48986e-08	-	VC0137
NC_002505_KPS-14	+	132606	30	24	33	6	4	3	18.1415	3.05093	0.671359	4.54441	5.50882e-06	3.19312e-05	-	VC0137
NC_002505_KPS-14	+	132629	991	407	932	50	58	75	454.63	3.99613	0.428446	9.32704	1.08867e-20	1.81904e-18	-	-
NC_002505_KPS-14	+	132630	1647	629	1702	72	68	76	762.499	4.50971	0.451056	9.99811	1.55329e-23	3.99111e-21	-	-
NC_002505_KPS-14	+	132631	210	105	229	30	43	41	117.156	2.5719	0.443846	5.79458	6.84918e-09	1.07465e-07	-	-
NC_002505_KPS-14	+	132671	60	20	46	1	3	4	24.175	4.30859	0.785621	5.48431	4.15081e-08	5.11935e-07	-	-
NC_002505_KPS-14	+	132673	64	29	55	9	6	5	30.2379	3.18064	0.611401	5.20221	1.96933e-07	1.93608e-06	-	-
NC_002505_KPS-14	+	132674	67	31	66	2	2	11	32.1989	3.84177	0.711685	5.39813	6.73384e-08	7.73657e-07	-	-
NC_002505_KPS-14	+	132675	35	38	29	1	1	3	19.7323	4.71066	0.843802	5.58265	2.36876e-08	3.14311e-07	-	-
NC_002505_KPS-14	+	132764	16	28	19	0	0	0	11.8742	7.17933	1.3781	5.2096	1.89253e-07	1.87183e-06	-	-
NC_002505_KPS-14	+	132765	53	79	53	2	4	5	36.3493	4.43203	0.65191	6.79854	1.05688e-11	3.46147e-10	-	-
NC_002505_KPS-14	+	133973	23	4	17	3	2	1	8.91846	3.14191	1.01756	3.08769	0.00201717	0.00451914	-	VC0142
NC_002505_KPS-14	+	133974	140	19	135	12	18	26	61.5645	2.72209	0.699941	3.88903	0.000100644	0.000355501	-	VC0142
NC_002505_KPS-14	+	133984	111	33	155	19	27	43	67.7336	2.09847	0.603034	3.47985	0.000501686	0.00137161	-	VC0142
NC_002505_KPS-14	+	133987	67	21	70	12	10	12	34.0033	2.52437	0.608595	4.14786	3.35594e-05	0.000143051	-	VC0142
NC_002505_KPS-14	+	134057	30	20	28	2	0	4	15.2525	4.06324	0.857792	4.73686	2.17054e-06	1.47657e-05	-	VC0142
NC_002505_KPS-14	+	134791	29	58	28	19	7	18	28.2055	1.74753	0.620849	2.81475	0.00488153	0.00975538	-	-
NC_002505_KPS-14	+	135228	13	14	20	3	3	9	10.8756	2.03376	0.758322	2.68193	0.00731992	0.0139088	-	VC0144
NC_002505_KPS-14	+	135306	29	11	25	1	0	3	12.4529	4.38086	1.01932	4.29783	1.72476e-05	8.23807e-05	-	VC0144
NC_002505_KPS-14	+	135327	8	4	24	2	0	1	7.13643	3.91011	1.27623	3.06379	0.00218553	0.00484413	-	VC0144
NC_002505_KPS-14	+	135331	47	50	41	9	1	9	28.4929	3.21645	0.655202	4.9091	9.14959e-07	7.16075e-06	-	VC0144
NC_002505_KPS-14	+	135333	30	28	38	7	5	4	20.316	2.89884	0.633179	4.57823	4.68933e-06	2.78974e-05	-	VC0144
NC_002505_KPS-14	+	135491	135	88	180	10	11	14	79.7915	3.85969	0.489592	7.88348	3.18386e-15	2.11702e-13	-	VC0144
NC_002505_KPS-14	+	135492	12	30	18	6	7	4	13.9779	2.14799	0.741383	2.89727	0.00376421	0.00777415	-	VC0144
NC_002505_KPS-14	+	135620	17	8	24	1	1	0	9.36532	4.91258	1.27211	3.86177	0.000112569	0.000390238	-	VC0144
NC_002505_KPS-14	+	135621	24	10	36	2	1	0	13.3935	4.83076	1.11061	4.34963	1.36366e-05	6.78728e-05	-	VC0144
NC_002505_KPS-14	+	135636	32	18	42	2	0	1	17.4568	5.2624	1.04413	5.04	4.65523e-07	4.03646e-06	-	VC0144
NC_002505_KPS-14	+	135695	43	9	37	0	0	0	16.2108	7.63305	1.41716	5.38618	7.19725e-08	8.18187e-07	-	VC0144
NC_002505_KPS-14	+	135816	22	2	17	1	1	2	7.99141	3.67703	1.1746	3.13046	0.00174534	0.00398468	-	VC0144
NC_002505_KPS-14	+	135817	16	2	20	1	2	1	7.54285	3.54059	1.17922	3.00249	0.0026778	0.00577452	-	VC0144
NC_002505_KPS-14	+	136754	26	10	20	1	4	1	11.1823	3.50972	0.928804	3.77875	0.000157615	0.000517557	-	-
NC_002505_KPS-14	+	136790	4	20	7	4	1	2	7.01382	2.50018	1.07389	2.32815	0.0199042	0.0335091	-	-
NC_002505_KPS-14	+	136881	24	27	10	9	4	13	15.1147	1.59758	0.710754	2.24773	0.0245934	0.0403744	-	-
NC_002505_KPS-14	+	136923	20	6	10	2	0	1	6.9948	3.88527	1.19615	3.24816	0.00116153	0.00280547	-	-
NC_002505_KPS-14	+	136937	26	55	25	11	11	16	25.6182	1.84767	0.596899	3.09546	0.0019651	0.00441817	-	-
NC_002505_KPS-14	+	137033	30	27	45	0	3	0	19.4748	5.39792	1.0432	5.17439	2.28655e-07	2.19965e-06	-	VC0147
NC_002505_KPS-14	+	137185	67	72	75	5	5	3	41.932	4.36237	0.591626	7.37352	1.66175e-13	7.9315e-12	-	VC0147
NC_002505_KPS-14	+	137214	89	126	67	17	13	17	59.8953	2.92702	0.490592	5.9663	2.42699e-09	4.30921e-08	-	VC0147
NC_002505_KPS-14	+	137384	100	50	61	3	1	5	40.0059	4.89062	0.694786	7.03903	1.93576e-12	7.46877e-11	-	VC0147
NC_002505_KPS-14	+	137447	77	36	33	7	7	13	30.5958	2.77116	0.59115	4.68775	2.76228e-06	1.80219e-05	-	VC0147
NC_002505_KPS-14	+	137455	132	20	71	2	0	2	40.8448	6.10852	1.0143	6.02237	1.71878e-09	3.19197e-08	-	VC0147
NC_002505_KPS-14	+	137464	207	190	192	15	20	13	116.824	3.93	0.423175	9.28693	1.588e-20	2.56162e-18	-	VC0147
NC_002505_KPS-14	+	137465	54	47	45	13	13	18	33.5684	2.07048	0.466134	4.44182	8.92007e-06	4.77044e-05	-	VC0147
NC_002505_KPS-14	+	137514	32	33	19	4	3	3	17.1533	3.39592	0.724233	4.68898	2.74564e-06	1.79251e-05	-	VC0147
NC_002505_KPS-14	+	137516	23	30	45	6	2	2	19.9113	3.60689	0.760753	4.74121	2.12449e-06	1.45033e-05	-	VC0147
NC_002505_KPS-14	+	137521	24	22	26	0	3	2	14.1294	4.18915	0.892926	4.69148	2.71237e-06	1.77472e-05	-	VC0147
NC_002505_KPS-14	+	137732	22	17	14	1	0	0	9.97491	5.94562	1.37037	4.3387	1.43327e-05	7.06986e-05	-	VC0147
NC_002505_KPS-14	+	137738	17	21	14	0	0	0	9.73008	6.89308	1.39052	4.95721	7.15143e-07	5.80271e-06	-	VC0147
NC_002505_KPS-14	+	137761	34	38	17	4	2	1	17.7013	3.97407	0.832472	4.77381	1.80769e-06	1.27023e-05	-	VC0147
NC_002505_KPS-14	+	137801	33	47	32	0	4	1	21.7869	4.81682	0.886175	5.43552	5.46376e-08	6.47877e-07	-	VC0147
NC_002505_KPS-14	+	137808	18	34	24	1	1	3	15.043	4.30495	0.9026	4.7695	1.84686e-06	1.29353e-05	-	VC0147
NC_002505_KPS-14	+	137809	9	30	9	1	4	0	9.97337	3.56998	1.12373	3.17692	0.0014885	0.00346785	-	VC0147
NC_002505_KPS-14	+	137815	45	38	19	1	3	1	19.6666	4.66374	0.886566	5.26045	1.43699e-07	1.48299e-06	-	VC0147
NC_002505_KPS-14	+	137854	38	45	57	5	2	6	28.075	3.78364	0.642068	5.8929	3.7948e-09	6.3948e-08	-	VC0147
NC_002505_KPS-14	+	137855	60	52	75	8	5	4	37.3811	3.77065	0.582787	6.47004	9.79785e-11	2.53867e-09	-	VC0147
NC_002505_KPS-14	+	137907	28	17	10	0	6	0	11.0661	3.4451	1.14089	3.01966	0.00253058	0.00550059	-	VC0147
NC_002505_KPS-14	+	137931	18	29	27	0	2	1	14.3663	4.97343	1.04959	4.73843	2.15379e-06	1.46662e-05	-	VC0147
NC_002505_KPS-14	+	138042	9	21	4	3	0	0	6.94608	3.80086	1.34891	2.81772	0.00483658	0.00967737	-	VC0147
NC_002505_KPS-14	+	138044	19	25	11	0	0	1	10.43	6.01382	1.39172	4.32114	1.55222e-05	7.55267e-05	-	VC0147
NC_002505_KPS-14	+	138064	14	31	18	10	4	7	15.0702	1.9292	0.714192	2.70123	0.00690844	0.0132251	-	VC0147
NC_002505_KPS-14	+	138072	22	56	17	15	8	7	22.6557	1.98601	0.724916	2.73965	0.00615047	0.0119425	-	VC0147
NC_002505_KPS-14	+	138082	37	39	27	15	14	7	24.7527	1.8089	0.587088	3.08114	0.00206208	0.00460532	-	VC0147
NC_002505_KPS-14	+	138083	34	27	19	4	5	3	16.6382	3.04641	0.699601	4.35449	1.33377e-05	6.66278e-05	-	VC0147
NC_002505_KPS-14	+	138097	9	35	13	8	1	8	13.3714	2.13715	0.895852	2.3856	0.0170512	0.0292527	-	VC0147
NC_002505_KPS-14	+	138187	142	141	127	36	34	26	90.9148	2.40213	0.408022	5.88725	3.92673e-09	6.59652e-08	-	VC0148
NC_002505_KPS-14	+	138357	38	34	35	6	11	6	23.3777	2.53048	0.582719	4.34254	1.40847e-05	6.97175e-05	-	VC0148
NC_002505_KPS-14	+	138446	30	25	26	8	13	10	19.6667	1.70694	0.562765	3.03313	0.0024203	0.0052921	-	VC0148
NC_002505_KPS-14	+	138463	108	138	85	20	17	18	70.2011	2.92027	0.455224	6.41502	1.40808e-10	3.48841e-09	-	VC0148
NC_002505_KPS-14	+	138503	24	22	14	3	3	4	12.6155	2.92255	0.75181	3.88735	0.000101346	0.000357486	-	VC0148
NC_002505_KPS-14	+	138555	66	89	42	17	24	26	46.7889	1.90409	0.499182	3.81442	0.000136501	0.000458717	-	VC0148
NC_002505_KPS-14	+	138779	32	20	24	5	8	4	16.6149	2.45955	0.659915	3.72707	0.00019372	0.000615652	-	VC0148
NC_002505_KPS-14	+	139071	39	33	31	9	7	4	22.2005	2.66199	0.610988	4.35686	1.31943e-05	6.60613e-05	-	VC0149
NC_002505_KPS-14	+	139208	30	21	26	3	1	4	15.3963	3.61132	0.765924	4.71498	2.41738e-06	1.61403e-05	-	VC0149
NC_002505_KPS-14	+	139245	20	10	13	0	0	1	8.02203	5.63399	1.40939	3.99746	6.40252e-05	0.000244166	-	VC0149
NC_002505_KPS-14	+	139347	20	8	17	6	0	2	9.47715	2.77828	0.996793	2.78722	0.00531621	0.0105096	-	VC0149
NC_002505_KPS-14	+	139360	22	13	11	1	1	0	8.78302	4.81961	1.25321	3.8458	0.000120157	0.000412005	-	VC0149
NC_002505_KPS-14	+	139395	8	6	31	0	0	0	8.39425	6.68107	1.54483	4.32479	1.52677e-05	7.45238e-05	-	VC0149
NC_002505_KPS-14	+	139406	32	11	28	1	4	3	14.1775	3.46684	0.840613	4.12418	3.7205e-05	0.000155882	-	VC0149
NC_002505_KPS-14	+	139414	20	10	14	5	2	6	9.96848	2.09481	0.778313	2.69147	0.00711379	0.013571	-	VC0149
NC_002505_KPS-14	+	139482	102	59	102	22	37	33	62.1734	1.83569	0.44839	4.09395	4.24089e-05	0.000173854	-	VC0149
NC_002505_KPS-14	+	139662	164	78	133	24	14	30	78.8145	2.7967	0.469463	5.95723	2.56556e-09	4.52102e-08	-	VC0149
NC_002505_KPS-14	+	139696	14	21	15	6	3	3	11.2243	2.38081	0.769868	3.09249	0.00198482	0.00445749	-	VC0149
NC_002505_KPS-14	+	139741	21	15	26	1	3	0	12.1373	4.24667	0.99488	4.26853	1.96766e-05	9.18563e-05	-	VC0149
NC_002505_KPS-14	+	139751	20	28	17	7	6	9	15.4208	1.9143	0.635855	3.01059	0.00260738	0.0056425	-	VC0149
NC_002505_KPS-14	+	139752	80	109	74	9	9	22	54.9804	3.10266	0.509229	6.09285	1.10915e-09	2.17156e-08	-	VC0149
NC_002505_KPS-14	+	139753	6	24	16	4	3	6	10.662	2.20747	0.844837	2.61289	0.00897796	0.0166428	-	VC0149
NC_002505_KPS-14	+	139830	19	5	22	6	6	2	10.608	1.97732	0.875149	2.25941	0.023858	0.0393351	-	VC0149
NC_002505_KPS-14	+	139899	40	15	17	5	7	12	16.5552	1.92352	0.681277	2.82341	0.00475164	0.00952827	-	-
NC_002505_KPS-14	+	139903	24	4	16	3	3	3	9.31614	2.58372	0.922048	2.80216	0.00507621	0.010094	-	-
NC_002505_KPS-14	+	139989	212	100	184	19	25	40	103.29	2.90773	0.452109	6.43147	1.26374e-10	3.17381e-09	-	-
NC_002505_KPS-14	+	139993	43	10	23	3	10	4	16.3675	2.4317	0.801975	3.03214	0.00242828	0.00530726	-	-
NC_002505_KPS-14	+	140027	41	30	30	11	22	7	24.8672	1.61331	0.620475	2.60012	0.00931922	0.0171909	-	VC0150
NC_002505_KPS-14	+	140042	26	11	20	8	8	5	13.6564	1.72716	0.691472	2.4978	0.0124966	0.0222514	-	VC0150
NC_002505_KPS-14	+	140043	258	156	142	22	137	16	129.826	1.90137	0.776119	2.44985	0.0142916	0.0250505	-	VC0150
NC_002505_KPS-14	+	140044	437	142	171	36	122	33	165.712	2.21193	0.663647	3.33299	0.000859191	0.00216968	-	VC0150
NC_002505_KPS-14	+	140045	774	241	302	20	193	42	278.416	2.60466	0.786634	3.31114	0.00092916	0.0023194	-	VC0150
NC_002505_KPS-14	+	140046	155	46	86	15	54	11	64.659	2.07705	0.717623	2.89434	0.00379955	0.00783634	-	VC0150
NC_002505_KPS-14	+	140081	23	14	10	4	7	2	10.6631	2.13009	0.814835	2.61413	0.00894542	0.0165884	-	VC0150
NC_002505_KPS-14	+	140116	34	12	25	9	8	6	16.4738	1.91287	0.672839	2.84299	0.00446932	0.0090257	-	VC0150
NC_002505_KPS-14	+	140117	38	5	12	3	8	2	11.8754	2.31596	0.961067	2.40978	0.0159624	0.0275949	-	VC0150
NC_002505_KPS-14	+	140118	22	10	10	1	2	0	8.16359	4.08313	1.14486	3.5665	0.000361785	0.00104008	-	VC0150
NC_002505_KPS-14	+	140155	28	12	8	2	8	2	10.6001	2.26482	0.909278	2.49079	0.0127458	0.0226504	-	VC0150
NC_002505_KPS-14	+	140156	46	17	18	6	8	0	16.9966	2.74839	0.913373	3.00906	0.00262059	0.00566757	-	VC0150
NC_002505_KPS-14	+	140169	73	23	45	3	27	6	31.2536	2.22131	0.81694	2.71906	0.00654669	0.0126179	-	VC0150
NC_002505_KPS-14	+	140204	142	80	128	15	19	11	71.388	3.25162	0.486916	6.67799	2.42239e-11	7.26157e-10	-	VC0150
NC_002505_KPS-14	+	140206	110	69	85	1	6	1	49.9699	5.34216	0.718992	7.43007	1.08536e-13	5.3729e-12	-	VC0150
NC_002505_KPS-14	+	140207	44	21	26	2	5	8	18.8153	2.94874	0.690125	4.27276	1.93064e-05	9.0441e-05	-	VC0150
NC_002505_KPS-14	+	140208	37	19	17	8	12	6	17.3523	1.77262	0.660344	2.68439	0.00726624	0.01382	-	VC0150
NC_002505_KPS-14	+	140213	330	236	270	12	23	31	164.219	4.01408	0.415413	9.66288	4.33494e-22	9.17283e-20	-	VC0150
NC_002505_KPS-14	+	140227	29	23	26	3	17	5	18.2977	1.93186	0.740614	2.60845	0.00909523	0.0168301	-	VC0150
NC_002505_KPS-14	+	140236	73	70	71	4	30	24	48.3028	2.23372	0.626187	3.56717	0.000360853	0.00103791	-	VC0150
NC_002505_KPS-14	+	140276	26	7	7	0	5	0	8.02318	3.22481	1.27042	2.53839	0.0111365	0.0201013	-	VC0150
NC_002505_KPS-14	+	140300	45	18	9	1	6	2	14.4516	3.27605	0.931269	3.51783	0.000435089	0.00121525	-	VC0150
NC_002505_KPS-14	+	140301	28	2	5	0	3	2	6.94244	3.08973	1.29119	2.39293	0.0167145	0.0287459	-	VC0150
NC_002505_KPS-14	+	140340	24	17	28	9	3	8	15.7327	2.1199	0.668618	3.17057	0.00152141	0.00353446	-	VC0150
NC_002505_KPS-14	+	140431	48	36	58	4	4	2	27.8854	4.13727	0.676183	6.11857	9.44185e-10	1.88622e-08	-	VC0150
NC_002505_KPS-14	+	140448	82	63	84	12	13	43	51.9003	2.1545	0.534223	4.03297	5.50766e-05	0.000215758	-	VC0150
NC_002505_KPS-14	+	140452	46	24	33	2	2	1	19.71	4.66989	0.848984	5.50057	3.78567e-08	4.72681e-07	-	VC0150
NC_002505_KPS-14	+	140455	55	22	38	8	29	7	27.8623	1.64109	0.717764	2.28639	0.0222314	0.0369685	-	VC0150
NC_002505_KPS-14	+	140456	128	34	56	1	45	10	48.1244	2.20404	0.948428	2.32388	0.0201318	0.0338495	-	VC0150
NC_002505_KPS-14	+	140457	52	14	19	7	12	2	18.6908	2.24527	0.821094	2.73449	0.0062477	0.0121082	-	VC0150
NC_002505_KPS-14	+	140462	28	20	21	6	10	6	16.0879	1.95662	0.630032	3.10559	0.00189902	0.0042875	-	VC0150
NC_002505_KPS-14	+	140566	30	27	30	14	8	5	20.3579	1.97643	0.628313	3.14561	0.00165742	0.00380862	-	VC0150
NC_002505_KPS-14	+	140605	20	11	18	4	6	2	10.8903	2.31451	0.786897	2.94131	0.0032683	0.00687533	-	VC0150
NC_002505_KPS-14	+	140665	180	104	137	16	14	29	86.0564	3.18428	0.439477	7.2456	4.30515e-13	1.90176e-11	-	VC0150
NC_002505_KPS-14	+	140686	59	26	24	6	24	4	25.2208	1.92244	0.785181	2.4484	0.0143493	0.0251381	-	VC0150
NC_002505_KPS-14	+	140729	102	33	47	10	41	20	43.7851	1.63676	0.66039	2.47848	0.0131942	0.02335	-	VC0150
NC_002505_KPS-14	+	140825	47	21	29	12	13	12	23.3036	1.69398	0.563242	3.00756	0.00263357	0.0056912	-	VC0150
NC_002505_KPS-14	+	142742	110	91	101	32	30	41	71.1985	1.88882	0.372142	5.07555	3.86378e-07	3.44744e-06	-	-
NC_002505_KPS-14	+	143193	13	13	21	1	0	6	9.68545	3.17314	0.989945	3.20537	0.00134887	0.00318776	-	VC0152
NC_002505_KPS-14	+	143246	8	10	20	4	1	0	7.9273	3.2028	1.10189	2.90665	0.00365318	0.00757019	-	VC0152
NC_002505_KPS-14	+	143751	23	5	20	3	4	6	10.6264	2.21294	0.838479	2.63924	0.00830932	0.0155491	-	VC0153
NC_002505_KPS-14	+	146406	32	85	32	20	17	17	36.4362	1.80984	0.607635	2.9785	0.00289667	0.00618653	-	VC0156
NC_002505_KPS-14	+	149839	79	49	59	1	0	0	34.6614	7.75962	1.27642	6.07919	1.20792e-09	2.34031e-08	-	VC0158
NC_002505_KPS-14	+	149848	28	19	13	0	0	1	11.1906	6.11953	1.37223	4.45956	8.21293e-06	4.44893e-05	-	VC0158
NC_002505_KPS-14	+	149860	25	29	21	1	2	0	14.4967	4.95854	1.03342	4.79819	1.60105e-06	1.14751e-05	-	VC0158
NC_002505_KPS-14	+	150730	14	47	11	5	1	5	15.3698	3.09636	0.907153	3.41327	0.000641889	0.00169184	-	-
NC_002505_KPS-14	+	150817	56	129	50	2	0	1	45.0259	6.65046	1.0305	6.45362	1.09208e-10	2.79342e-09	-	-
NC_002505_KPS-14	+	150837	40	99	33	6	10	21	37.8921	2.63269	0.667322	3.94516	7.97463e-05	0.000293259	-	-
NC_002505_KPS-14	+	150838	116	251	56	26	13	27	89.8987	3.04849	0.634336	4.80579	1.54139e-06	1.11162e-05	-	-
NC_002505_KPS-14	+	151874	4	23	0	0	0	1	5.35758	5.03362	1.90131	2.64745	0.00811009	0.0152249	VCr004	16Sb
NC_002505_KPS-14	+	151879	0	27	3	0	0	1	6.01216	5.20329	1.92161	2.70778	0.00677348	0.0129993	VCr004	16Sb
NC_002505_KPS-14	+	153019	23	14	10	7	6	5	11.367	1.68434	0.723686	2.32744	0.0199418	0.0335661	-	-
NC_002505_KPS-14	+	156164	41	194	23	0	0	2	49.9626	7.45583	1.351	5.51876	3.41405e-08	4.32739e-07	-	-
NC_002505_KPS-14	+	156165	6	44	3	0	3	2	11.0145	3.80691	1.27769	2.97954	0.00288683	0.00616808	-	-
NC_002505_KPS-14	+	156200	33	38	27	1	0	1	18.5974	5.96228	1.16778	5.10567	3.29621e-07	3.00589e-06	-	-
NC_002505_KPS-14	+	156201	83	174	63	8	15	17	66.4229	3.37273	0.587755	5.73834	9.56108e-09	1.4287e-07	-	-
NC_002505_KPS-14	+	156202	25	90	17	3	1	10	27.1947	3.69356	0.904694	4.08266	4.45232e-05	0.000180979	-	-
NC_002505_KPS-14	+	157418	23	2	35	2	1	6	12.2082	3.115	1.0666	2.92051	0.0034946	0.00728465	-	-
NC_002505_KPS-14	+	164953	8	20	1	0	2	1	5.97024	3.63546	1.41811	2.5636	0.0103593	0.0188651	-	VC0167
NC_002505_KPS-14	+	164961	9	23	8	5	3	1	9.02028	2.45795	0.954849	2.57417	0.010048	0.0183654	-	VC0167
NC_002505_KPS-14	+	165060	45	41	51	18	12	16	32.3429	1.90183	0.48478	3.92307	8.74273e-05	0.000315981	-	VC0167
NC_002505_KPS-14	+	165313	31	21	19	5	3	4	14.9009	2.88318	0.702263	4.10555	4.03352e-05	0.000166706	-	VC0167
NC_002505_KPS-14	+	165314	33	33	25	4	0	2	17.8486	4.25287	0.843767	5.04034	4.64701e-07	4.03031e-06	-	VC0167
NC_002505_KPS-14	+	165430	138	86	120	23	15	14	71.4084	3.02341	0.466571	6.48006	9.1689e-11	2.39932e-09	-	VC0167
NC_002505_KPS-14	+	165554	10	23	16	4	1	4	10.5911	2.81226	0.860103	3.26968	0.00107668	0.00262939	-	VC0167
NC_002505_KPS-14	+	165610	26	32	27	3	2	5	17.3411	3.44749	0.709616	4.85825	1.1843e-06	8.9088e-06	-	VC0167
NC_002505_KPS-14	+	165854	12	21	19	3	2	2	10.8544	3.2305	0.852347	3.79012	0.000150574	0.00049787	-	VC0167
NC_002505_KPS-14	+	166528	6	20	7	1	1	4	7.12709	2.8796	1.06575	2.70196	0.00689319	0.0132006	-	-
NC_002505_KPS-14	+	167161	12	57	7	5	11	3	17.5883	2.32516	0.954873	2.43504	0.01489	0.025977	-	-
NC_002505_KPS-14	+	167290	417	585	385	97	61	158	305.588	2.51853	0.423595	5.94561	2.75422e-09	4.81807e-08	-	-
NC_002505_KPS-14	+	167337	29	7	12	1	1	1	9.13316	4.29704	1.14741	3.745	0.000180394	0.000579548	VCt007	tRNA-His-1
NC_002505_KPS-14	+	167376	41	89	31	11	2	15	34.4985	2.92222	0.72605	4.02482	5.70178e-05	0.000221993	-	-
NC_002505_KPS-14	+	167378	41	104	17	5	1	4	32.3137	4.38699	0.877554	4.99911	5.75953e-07	4.83998e-06	-	-
NC_002505_KPS-14	+	167379	391	1309	241	29	8	43	382.838	5.02339	0.731179	6.87025	6.40876e-12	2.20751e-10	-	-
NC_002505_KPS-14	+	167389	11	24	4	3	1	2	8.29718	3.05069	1.05551	2.89025	0.00384933	0.00792514	-	-
NC_002505_KPS-14	+	167391	19	22	30	12	5	12	17.5312	1.63961	0.625246	2.62234	0.00873283	0.0162458	-	-
NC_002505_KPS-14	+	167395	11	72	11	8	4	11	21.496	2.44435	0.894043	2.73404	0.0062562	0.0121221	-	-
NC_002505_KPS-14	+	167397	5	61	5	2	1	3	14.698	3.98839	1.18532	3.36481	0.000765954	0.00196826	-	-
NC_002505_KPS-14	+	167514	149	272	137	28	13	46	117.702	3.0786	0.53524	5.75182	8.82883e-09	1.33499e-07	-	-
NC_002505_KPS-14	+	167515	91	136	83	9	6	16	62.6765	3.69952	0.527067	7.01907	2.23349e-12	8.52001e-11	-	-
NC_002505_KPS-14	+	167516	1734	2418	1486	63	27	94	1084.11	5.32366	0.472882	11.2579	2.11731e-29	1.2351e-26	-	-
NC_002505_KPS-14	+	167547	12	25	8	5	1	5	10.1206	2.40338	0.893758	2.68907	0.00716511	0.0136547	-	-
NC_002505_KPS-14	+	167550	15	32	14	3	1	10	13.4534	2.55723	0.853537	2.99604	0.00273513	0.00588369	-	-
NC_002505_KPS-14	+	167574	206	383	188	45	21	86	168.152	2.76737	0.54701	5.05909	4.21256e-07	3.70956e-06	-	-
NC_002505_KPS-14	+	167658	173	356	155	18	5	25	136.285	4.22854	0.604358	6.99675	2.6197e-12	9.85792e-11	VCt009	tRNA-His-2
NC_002505_KPS-14	+	167659	296	548	195	88	15	141	230.61	2.51012	0.692532	3.62456	0.000289457	0.000861386	-	-
NC_002505_KPS-14	+	167662	544	1100	439	72	17	99	420.897	3.87373	0.621449	6.23338	4.56475e-10	9.92975e-09	-	-
NC_002505_KPS-14	+	167663	171	361	133	62	43	120	157.939	1.97274	0.542052	3.6394	0.000273279	0.000820062	-	-
NC_002505_KPS-14	+	167673	19	52	13	2	5	3	17.5032	3.4237	0.85929	3.98434	6.76675e-05	0.000255573	-	-
NC_002505_KPS-14	+	167681	22	87	12	12	12	18	29.3644	1.91907	0.78368	2.4488	0.0143335	0.0251161	-	-
NC_002505_KPS-14	+	167720	50	553	18	44	12	6	130.932	3.63105	1.08526	3.34577	0.000820535	0.00208627	VCt010	tRNA-Pro-2
NC_002505_KPS-14	+	168409	579	1774	469	251	179	316	647.697	2.30458	0.574312	4.01276	6.00139e-05	0.000231536	-	-
NC_002505_KPS-14	+	168410	266	699	223	139	95	223	291.764	1.7802	0.553898	3.21395	0.0013092	0.00310743	-	-
NC_002505_KPS-14	+	168412	161	320	163	87	70	105	160.225	1.66032	0.449296	3.69539	0.000219549	0.000682482	-	-
NC_002505_KPS-14	+	168446	29	4	45	9	5	5	17.1733	2.31988	0.876437	2.64694	0.00812235	0.0152452	-	-
NC_002505_KPS-14	+	168567	14	14	22	4	4	5	11.2444	2.28348	0.732887	3.11573	0.00183488	0.00415988	-	VC0170
NC_002505_KPS-14	+	169139	24	17	31	2	1	6	14.5894	3.37715	0.797516	4.23459	2.28971e-05	0.000104085	-	VC0170
NC_002505_KPS-14	+	169181	18	27	27	0	4	3	14.5427	3.72092	0.856497	4.34435	1.39687e-05	6.92384e-05	-	VC0170
NC_002505_KPS-14	+	169893	125	105	174	29	34	43	90.6749	2.27241	0.404704	5.615	1.96559e-08	2.67836e-07	-	VC0170
NC_002505_KPS-14	+	170392	17	10	28	3	9	8	13.1179	1.79666	0.745956	2.40853	0.016017	0.0276796	-	VC0171
NC_002505_KPS-14	+	170519	8	39	9	4	2	3	12.1178	3.00543	0.961281	3.12648	0.0017691	0.00403006	-	VC0171
NC_002505_KPS-14	+	170536	32	14	31	0	1	0	14.3136	6.47519	1.35465	4.77996	1.75326e-06	1.2381e-05	-	VC0171
NC_002505_KPS-14	+	171842	75	9	65	7	13	12	31.7613	2.52078	0.758722	3.3224	0.000892466	0.0022417	-	VC0171
NC_002505_KPS-14	+	171940	33	45	33	2	1	0	21.2998	5.53132	1.00147	5.5232	3.32884e-08	4.23381e-07	-	-
NC_002505_KPS-14	+	172248	26	14	24	3	3	12	14.2686	2.21793	0.735293	3.01638	0.0025581	0.00555189	-	VC0172
NC_002505_KPS-14	+	172251	7	29	4	5	1	3	9.03604	2.51557	1.06676	2.35814	0.018367	0.0312237	-	VC0172
NC_002505_KPS-14	+	172850	43	18	51	5	3	7	22.7823	3.23816	0.689686	4.69513	2.6644e-06	1.7492e-05	-	VC0172
NC_002505_KPS-14	+	172931	15	6	24	2	5	4	9.92626	2.3562	0.867388	2.71643	0.00659901	0.0127073	-	VC0172
NC_002505_KPS-14	+	174015	28	72	18	16	12	21	29.6041	1.6458	0.666326	2.46997	0.0135125	0.0238545	-	-
NC_002505_KPS-14	+	174062	13	44	7	7	4	9	15.1597	2.06777	0.856806	2.41334	0.0158069	0.0273582	-	-
NC_002505_KPS-14	+	176252	36	36	25	8	5	24	23.175	1.79713	0.638189	2.81598	0.00486282	0.00972231	-	-
NC_002505_KPS-14	+	177012	16	30	7	4	5	8	12.4696	2.01704	0.802068	2.5148	0.0119099	0.0213208	-	-
NC_002505_KPS-14	+	177013	84	136	73	35	37	38	71.5137	1.75415	0.454392	3.86044	0.000113182	0.000391972	-	-
NC_002505_KPS-14	+	177018	14	20	13	2	1	0	9.3066	4.27988	1.10347	3.87856	0.000105078	0.000368389	-	-
NC_002505_KPS-14	+	179114	27	60	23	15	9	14	26.481	1.88836	0.628856	3.00285	0.00267463	0.00576861	-	-
NC_002505_KPS-14	+	179481	26	49	44	9	8	12	26.6943	2.39721	0.574102	4.17558	2.97231e-05	0.000129392	-	VC0178
NC_002505_KPS-14	+	180346	17	54	24	5	1	2	19.3352	3.91333	0.875671	4.46895	7.86059e-06	4.29049e-05	-	VC0178
NC_002505_KPS-14	+	180372	17	10	21	2	3	7	10.5581	2.36828	0.794803	2.97971	0.00288521	0.00616523	-	VC0178
NC_002505_KPS-14	+	180881	28	12	28	10	9	5	16.1875	1.78245	0.683367	2.60833	0.00909854	0.016835	-	VC0179
NC_002505_KPS-14	+	181290	15	20	23	2	5	2	12.2476	3.0097	0.801444	3.75535	0.000173101	0.000559692	-	VC0179
NC_002505_KPS-14	+	181596	14	17	31	6	5	9	14.5115	1.9906	0.687779	2.89425	0.00380069	0.00783853	-	VC0179
NC_002505_KPS-14	+	181743	75	120	83	17	9	10	57.7564	3.27461	0.52965	6.18259	6.30579e-10	1.31574e-08	-	VC0180
NC_002505_KPS-14	+	181755	10	31	8	7	3	4	11.4733	2.15144	0.875957	2.4561	0.0140453	0.0246769	-	VC0180
NC_002505_KPS-14	+	181771	39	56	26	6	5	8	25.4937	3.02601	0.625554	4.83733	1.31593e-06	9.7268e-06	-	VC0180
NC_002505_KPS-14	+	182006	10	27	21	3	2	8	12.8182	2.56695	0.811698	3.16245	0.00156448	0.00362065	-	VC0180
NC_002505_KPS-14	+	182041	9	28	4	3	4	3	9.34219	2.3887	0.979432	2.43887	0.0147335	0.0257343	-	VC0180
NC_002505_KPS-14	+	182051	20	32	35	2	2	5	17.6346	3.64848	0.756589	4.82227	1.4193e-06	1.03699e-05	-	VC0180
NC_002505_KPS-14	+	182054	95	53	108	16	22	30	57.1503	2.25473	0.471513	4.78191	1.73639e-06	1.22849e-05	-	VC0180
NC_002505_KPS-14	+	182060	36	67	35	9	11	10	30.525	2.54582	0.578685	4.39933	1.08587e-05	5.62032e-05	-	VC0180
NC_002505_KPS-14	+	182369	15	15	27	6	7	9	13.8603	1.71946	0.662161	2.59674	0.00941118	0.0173348	-	VC0180
NC_002505_KPS-14	+	182546	37	58	31	4	6	9	26.4388	3.09802	0.621705	4.9831	6.25721e-07	5.18354e-06	-	VC0180
NC_002505_KPS-14	+	182550	49	43	38	6	11	12	28.386	2.50615	0.530059	4.72805	2.26684e-06	1.52961e-05	-	VC0180
NC_002505_KPS-14	+	182573	39	39	43	5	0	2	23.617	4.43616	0.792014	5.60111	2.12978e-08	2.87048e-07	-	VC0180
NC_002505_KPS-14	+	182579	14	23	10	5	2	3	10.3585	2.56661	0.837298	3.06535	0.00217417	0.00482183	-	VC0180
NC_002505_KPS-14	+	182581	11	29	11	6	7	4	12.2929	1.91447	0.7901	2.42307	0.01539	0.0267292	-	VC0180
NC_002505_KPS-14	+	182582	22	49	28	8	10	18	23.9061	1.84815	0.61196	3.02006	0.00252727	0.00549438	-	VC0180
NC_002505_KPS-14	+	182584	23	38	30	8	2	7	19.6266	2.77514	0.683054	4.06284	4.84797e-05	0.000194187	-	VC0180
NC_002505_KPS-14	+	182597	10	21	10	2	0	1	8.20971	4.12322	1.15877	3.55827	0.0003733	0.00106759	-	VC0180
NC_002505_KPS-14	+	182662	39	76	51	12	7	11	35.798	2.81921	0.5676	4.9669	6.80311e-07	5.56116e-06	-	VC0180
NC_002505_KPS-14	+	182711	8	20	12	2	3	1	8.51852	3.06419	0.96612	3.17165	0.00151577	0.00352294	-	VC0180
NC_002505_KPS-14	+	182753	37	23	33	4	10	9	20.5521	2.34632	0.606788	3.86678	0.000110283	0.000383372	-	VC0180
NC_002505_KPS-14	+	182946	23	23	29	4	5	5	16.0605	2.75683	0.658951	4.18366	2.86857e-05	0.00012555	-	VC0180
NC_002505_KPS-14	+	182989	21	14	23	2	1	4	11.7226	3.40652	0.838814	4.06112	4.88377e-05	0.000195295	-	VC0180
NC_002505_KPS-14	+	183050	40	17	29	3	6	6	17.9632	2.84178	0.680885	4.17366	2.99745e-05	0.000130255	-	VC0180
NC_002505_KPS-14	+	183084	22	13	21	6	7	7	13.3086	1.80632	0.654376	2.76037	0.00577354	0.0113019	-	VC0180
NC_002505_KPS-14	+	183112	24	14	31	1	1	0	13.0817	5.41508	1.21228	4.46686	7.93771e-06	4.32437e-05	-	VC0180
NC_002505_KPS-14	+	183121	25	13	12	1	0	3	9.71073	4.00571	1.0425	3.84239	0.000121842	0.000416971	-	VC0180
NC_002505_KPS-14	+	183176	90	45	69	14	3	6	41.0079	3.43848	0.638499	5.38525	7.23455e-08	8.21736e-07	-	VC0180
NC_002505_KPS-14	+	183207	12	21	14	2	2	0	9.50263	3.86142	1.03272	3.73907	0.000184705	0.000591372	-	VC0180
NC_002505_KPS-14	+	183230	15	16	26	5	1	4	12.1209	2.85336	0.806891	3.53624	0.000405869	0.0011469	-	VC0180
NC_002505_KPS-14	+	183256	24	24	37	6	7	8	18.954	2.35672	0.608659	3.87199	0.000107948	0.000376627	-	VC0180
NC_002505_KPS-14	+	183371	13	17	26	0	1	4	11.1586	3.88931	0.989892	3.92902	8.52929e-05	0.000309574	-	VC0180
NC_002505_KPS-14	+	183410	17	14	20	2	2	1	10.2453	3.66502	0.914167	4.00913	6.09423e-05	0.000234397	-	VC0180
NC_002505_KPS-14	+	183470	6	8	20	2	0	1	6.82598	3.84061	1.22699	3.13011	0.0017474	0.00398871	-	VC0180
NC_002505_KPS-14	+	183498	37	24	43	5	4	5	21.3269	3.21884	0.643341	5.00331	5.63548e-07	4.75239e-06	-	VC0181
NC_002505_KPS-14	+	183499	23	24	38	6	9	11	19.6639	2.05913	0.598943	3.43794	0.000586161	0.00156626	-	VC0181
NC_002505_KPS-14	+	183592	17	29	9	2	0	0	10.6936	5.10027	1.3015	3.91878	8.89983e-05	0.000320779	-	VC0181
NC_002505_KPS-14	+	183868	21	3	27	0	7	5	11.064	2.41309	1.07513	2.24447	0.0248022	0.0406725	-	VC0181
NC_002505_KPS-14	+	183886	33	1	42	7	5	5	16.3915	2.44124	1.00258	2.43496	0.0148936	0.025982	-	VC0181
NC_002505_KPS-14	+	183914	52	6	70	3	3	1	24.4716	4.45891	0.984627	4.52852	5.9397e-06	3.3978e-05	-	VC0181
NC_002505_KPS-14	+	183925	21	6	30	1	3	0	11.1134	4.10021	1.11179	3.68792	0.000226093	0.000699742	-	VC0181
NC_002505_KPS-14	+	184027	18	31	40	8	10	10	20.9065	2.01382	0.612963	3.28538	0.00101844	0.00250666	-	-
NC_002505_KPS-14	+	186562	26	66	44	7	11	14	30.4523	2.46333	0.606663	4.06046	4.89758e-05	0.000195717	-	-
NC_002505_KPS-14	+	186869	17	46	12	12	7	13	18.9822	1.5996	0.726342	2.20226	0.0276468	0.0447444	-	-
NC_002505_KPS-14	+	192200	17	29	20	6	11	8	16.1689	1.73872	0.645113	2.69521	0.00703432	0.0134356	-	VC0188
NC_002505_KPS-14	+	192370	61	54	37	19	26	17	37.5912	1.59941	0.49804	3.21142	0.00132082	0.00313176	-	VC0188
NC_002505_KPS-14	+	193110	33	33	22	12	12	11	21.631	1.65138	0.551942	2.99194	0.00277213	0.00595212	-	VC0188
NC_002505_KPS-14	+	193132	62	25	79	10	22	17	37.8302	2.07454	0.597642	3.47121	0.000518121	0.00140994	-	VC0188
NC_002505_KPS-14	+	194115	9	32	35	2	6	2	15.9796	3.25656	0.875085	3.72142	0.000198102	0.000627287	-	-
NC_002505_KPS-14	+	194116	65	52	67	0	3	2	34.8828	5.53857	0.805841	6.87303	6.28505e-12	2.16975e-10	-	-
NC_002505_KPS-14	+	194252	8	22	4	2	2	3	7.50326	2.65544	1.02999	2.57812	0.00993391	0.0181806	VC0190	uvrD
NC_002505_KPS-14	+	194295	53	128	41	4	4	2	43.7061	4.80688	0.763354	6.29705	3.03356e-10	6.91682e-09	VC0190	uvrD
NC_002505_KPS-14	+	194296	88	191	49	30	22	51	76.9782	2.06737	0.601568	3.43663	0.000589008	0.00157283	VC0190	uvrD
NC_002505_KPS-14	+	194436	13	20	17	2	2	1	10.1683	3.64953	0.926833	3.93763	8.22897e-05	0.000300828	VC0190	uvrD
NC_002505_KPS-14	+	195905	35	12	23	1	0	1	13.069	5.44948	1.23277	4.42051	9.84679e-06	5.18295e-05	VC0190	uvrD
NC_002505_KPS-14	+	196235	10	21	5	6	2	2	8.36539	2.16391	0.969131	2.23283	0.0255601	0.0417631	VC0190	uvrD
NC_002505_KPS-14	+	196370	68	59	54	9	10	12	38.1809	2.88089	0.483613	5.95701	2.56889e-09	4.52541e-08	VC0190	uvrD
NC_002505_KPS-14	+	196391	150	125	132	9	7	7	79.0126	4.46674	0.479478	9.31584	1.20987e-20	2.00255e-18	-	-
NC_002505_KPS-14	+	196471	43	41	40	0	0	2	23.3345	6.31775	1.15733	5.45891	4.79071e-08	5.78882e-07	-	-
NC_002505_KPS-14	+	197963	7	28	1	0	1	0	7.08792	5.43894	1.6913	3.21583	0.00130068	0.00308992	-	-
NC_002505_KPS-14	+	198119	4	34	0	0	0	1	7.52643	5.53465	1.88345	2.93856	0.00329736	0.00692865	-	-
NC_002505_KPS-14	+	198210	7	33	1	2	0	4	8.74111	3.22261	1.32893	2.42496	0.01531	0.0266069	-	-
NC_002505_KPS-14	+	198285	10	31	12	3	4	3	11.6092	2.75779	0.85955	3.20841	0.00133469	0.00316013	-	-
NC_002505_KPS-14	+	199312	3	20	2	2	0	2	5.41718	3.05184	1.38115	2.20963	0.027131	0.0440093	-	-
NC_002505_KPS-14	+	202289	12	26	6	0	0	0	8.34341	6.66966	1.50618	4.4282	9.50246e-06	5.03203e-05	-	VC0196
NC_002505_KPS-14	+	202509	8	21	13	0	1	2	8.38514	4.2014	1.16387	3.60984	0.000306385	0.000903862	-	VC0196
NC_002505_KPS-14	+	202792	12	22	8	4	3	7	9.93771	1.96338	0.811247	2.4202	0.0155121	0.0269135	-	VC0196
NC_002505_KPS-14	+	203495	19	31	11	0	0	0	11.4873	7.13192	1.41459	5.0417	4.61412e-07	4.00565e-06	-	VC0196
NC_002505_KPS-14	+	203831	9	43	4	2	1	2	11.5327	3.87151	1.14736	3.37428	0.000740088	0.00191232	-	VC0197
NC_002505_KPS-14	+	205651	3	24	2	2	0	0	5.95452	4.1874	1.62237	2.58103	0.00985056	0.018048	-	-
NC_002505_KPS-14	+	210475	9	23	4	0	1	1	7.13922	4.55002	1.39692	3.25718	0.00112525	0.0027297	-	VC0203
NC_002505_KPS-14	+	210968	5	30	4	0	0	0	7.53695	6.5217	1.64183	3.97221	7.12087e-05	0.000266559	-	VC0203
NC_002505_KPS-14	+	211308	1	20	2	0	0	0	4.49293	5.77421	1.88958	3.05581	0.00224451	0.00495775	-	VC0203
NC_002505_KPS-14	+	211725	8	23	10	3	1	4	8.95447	2.74251	0.936187	2.92945	0.00339566	0.00710601	-	VC0203
NC_002505_KPS-14	+	211977	25	41	34	4	9	6	21.6609	2.73515	0.637067	4.29335	1.75995e-05	8.3713e-05	-	VC0203
NC_002505_KPS-14	+	213494	104	97	117	9	4	14	63.0616	3.91996	0.507576	7.72291	1.13701e-14	6.7754e-13	-	VC0205
NC_002505_KPS-14	+	214328	11	23	20	1	0	0	10.3669	5.99833	1.39293	4.30627	1.66029e-05	7.97565e-05	VC0206	murQ
NC_002505_KPS-14	+	214336	7	26	6	0	0	0	7.4721	6.50932	1.55852	4.17661	2.95884e-05	0.000128889	VC0206	murQ
NC_002505_KPS-14	+	214418	686	896	505	0	0	2	391.221	10.3941	1.11818	9.29558	1.4641e-20	2.37953e-18	VC0206	murQ
NC_002505_KPS-14	+	214419	215	278	142	0	0	1	119.051	9.54376	1.27041	7.51237	5.80679e-14	3.03757e-12	VC0206	murQ
NC_002505_KPS-14	+	214420	95	132	56	0	0	0	53.0894	9.34168	1.30226	7.17344	7.31381e-13	3.10987e-11	VC0206	murQ
NC_002505_KPS-14	+	214421	21	31	11	1	0	1	12.1237	5.33413	1.25247	4.25888	2.05458e-05	9.5185e-05	VC0206	murQ
NC_002505_KPS-14	+	214433	32	9	32	0	1	1	13.6411	5.51494	1.25811	4.38351	1.16784e-05	5.9713e-05	-	-
NC_002505_KPS-14	+	214853	10	20	16	1	1	1	9.13598	4.28956	1.09907	3.90288	9.50529e-05	0.000338732	VC0207	murP
NC_002505_KPS-14	+	215899	119	67	135	20	18	26	68.6667	2.65826	0.455191	5.83989	5.22363e-09	8.46424e-08	-	-
NC_002505_KPS-14	+	215903	422	402	231	0	3	1	196.752	8.3729	0.852362	9.82318	8.94792e-23	2.10648e-20	-	-
NC_002505_KPS-14	+	217855	22	12	17	6	2	5	11.3108	2.29455	0.756052	3.0349	0.00240612	0.00526589	VC0210	rph
NC_002505_KPS-14	+	218126	31	15	18	5	7	12	15.1745	1.7612	0.652547	2.69897	0.00695549	0.0133055	VC0210	rph
NC_002505_KPS-14	+	218180	18	15	22	8	4	8	13.1644	1.79684	0.666515	2.69588	0.00702039	0.013412	VC0210	rph
NC_002505_KPS-14	+	218300	53	31	88	7	12	21	37.5525	2.47283	0.599759	4.12304	3.73898e-05	0.000156504	VC0210	rph
NC_002505_KPS-14	+	218551	16	36	27	8	3	10	17.9863	2.28885	0.693946	3.2983	0.000972705	0.00241009	-	-
NC_002505_KPS-14	+	218603	20	10	6	2	1	0	7.06694	3.85247	1.19766	3.21667	0.00129689	0.00308187	-	-
NC_002505_KPS-14	+	221229	23	10	21	0	1	0	10.0801	5.96287	1.38931	4.29196	1.77103e-05	8.4124e-05	-	-
NC_002505_KPS-14	+	221380	39	29	75	3	4	1	27.839	4.4591	0.786974	5.66613	1.46057e-08	2.06932e-07	-	-
NC_002505_KPS-14	+	221381	25	17	27	7	6	4	15.3714	2.32265	0.666786	3.48335	0.000495179	0.00135651	-	-
NC_002505_KPS-14	+	223906	43	4	32	7	1	3	15.9588	3.11247	0.983027	3.16621	0.00154438	0.00358057	-	VC0216
NC_002505_KPS-14	+	223914	56	3	50	7	0	1	20.9937	3.99803	1.1773	3.39595	0.000683917	0.00178669	-	VC0216
NC_002505_KPS-14	+	223915	118	16	184	11	15	11	63.8077	3.39381	0.76797	4.4192	9.90671e-06	5.20751e-05	-	VC0216
NC_002505_KPS-14	+	223937	21	1	17	0	0	1	7.17238	5.47065	1.62129	3.37425	0.000740183	0.00191245	-	VC0216
NC_002505_KPS-14	+	223938	245	30	300	6	9	8	108.32	4.94422	0.767844	6.4391	1.20186e-10	3.04106e-09	-	VC0216
NC_002505_KPS-14	+	224099	20	7	21	7	5	7	11.6198	1.65267	0.73907	2.23614	0.0253424	0.0414444	-	VC0216
NC_002505_KPS-14	+	224126	52	6	41	2	6	10	20.4777	2.80603	0.861219	3.2582	0.0011212	0.00272104	-	VC0216
NC_002505_KPS-14	+	224127	46	12	42	8	10	7	22.0379	2.28795	0.685105	3.33957	0.000839092	0.00212634	-	VC0216
NC_002505_KPS-14	+	224185	23	3	25	1	4	0	10.0919	3.59052	1.17435	3.05746	0.00223222	0.00493445	-	VC0216
NC_002505_KPS-14	+	224218	65	13	58	12	6	10	28.9353	2.57946	0.704124	3.66337	0.000248921	0.000758065	-	VC0216
NC_002505_KPS-14	+	224316	19	6	20	0	0	0	8.24698	6.65824	1.46803	4.5355	5.74679e-06	3.30496e-05	-	VC0216
NC_002505_KPS-14	+	224393	23	26	35	0	1	2	16.1132	5.17144	1.03158	5.01313	5.35511e-07	4.54902e-06	-	VC0216
NC_002505_KPS-14	+	224561	44	3	27	0	1	1	13.611	5.5162	1.37766	4.00405	6.22672e-05	0.000238676	-	VC0216
NC_002505_KPS-14	+	224801	46	46	49	6	16	16	31.8202	2.24097	0.530617	4.22333	2.40724e-05	0.000108514	-	VC0216
NC_002505_KPS-14	+	225009	28	5	34	4	8	4	14.6746	2.34915	0.851424	2.75908	0.00579642	0.0113399	-	VC0216
NC_002505_KPS-14	+	225032	19	2	22	4	5	2	9.53239	2.22984	0.995099	2.24082	0.0250378	0.041009	-	VC0216
NC_002505_KPS-14	+	225052	32	1	41	5	1	4	14.9406	3.19469	1.10067	2.90248	0.00370218	0.00766055	-	VC0216
NC_002505_KPS-14	+	226000	119	414	148	50	38	63	152.234	2.55676	0.57589	4.43968	9.00946e-06	4.8111e-05	-	-
NC_002505_KPS-14	+	226109	826	1909	713	438	316	688	862.107	1.65269	0.505064	3.27223	0.00106703	0.00260922	-	-
NC_002505_KPS-14	+	226116	31	70	23	6	15	5	27.5173	2.5698	0.731215	3.51443	0.000440697	0.00122834	-	-
NC_002505_KPS-14	+	226131	14	32	8	0	5	0	11.0489	3.72831	1.19692	3.11492	0.00183995	0.00416988	-	-
NC_002505_KPS-14	+	226132	13	23	7	2	1	1	8.72361	3.76253	1.06614	3.52911	0.000416953	0.00117294	-	-
NC_002505_KPS-14	+	226133	20	21	6	4	5	6	10.9531	1.989	0.79674	2.49642	0.0125455	0.022329	-	-
NC_002505_KPS-14	+	226339	13	31	13	5	3	4	12.6099	2.59803	0.797531	3.25759	0.00112361	0.00272627	VC0218	rpmB
NC_002505_KPS-14	+	226363	29	30	27	7	0	9	18.3016	2.80258	0.777596	3.60416	0.000313168	0.000920881	VC0218	rpmB
NC_002505_KPS-14	+	226364	54	85	51	14	1	26	41.4375	2.63433	0.750449	3.51034	0.000447528	0.00124461	VC0218	rpmB
NC_002505_KPS-14	+	226394	25	34	15	6	7	4	16.469	2.4378	0.699302	3.48605	0.000490215	0.00134472	VC0218	rpmB
NC_002505_KPS-14	+	226491	18	51	11	8	6	6	18.2664	2.34712	0.785349	2.98863	0.00280233	0.00600907	VC0219	rpmG
NC_002505_KPS-14	+	226532	28	98	18	2	0	0	27.9039	6.51112	1.30024	5.00762	5.51079e-07	4.66072e-06	VC0219	rpmG
NC_002505_KPS-14	+	226538	7	25	5	0	0	1	7.21296	5.47085	1.5429	3.54583	0.000391373	0.0011117	VC0219	rpmG
NC_002505_KPS-14	+	227121	19	23	21	9	11	6	15.7573	1.58563	0.630877	2.51338	0.0119582	0.0213955	-	VC0220
NC_002505_KPS-14	+	227542	18	8	20	1	1	1	8.91465	4.25816	1.10669	3.84765	0.000119258	0.000409455	-	VC0221
NC_002505_KPS-14	+	227543	20	10	13	4	4	6	9.9381	1.94933	0.747775	2.60684	0.00913823	0.0169012	-	VC0221
NC_002505_KPS-14	+	227843	12	9	21	1	0	2	8.21984	4.17177	1.14786	3.63439	0.000278638	0.000833665	-	VC0221
NC_002505_KPS-14	+	228021	53	52	47	5	3	9	30.7294	3.52154	0.582589	6.04464	1.49739e-09	2.82064e-08	-	VC0221
NC_002505_KPS-14	+	228048	41	64	31	4	0	7	27.1091	4.02332	0.776543	5.18107	2.20622e-07	2.13436e-06	-	VC0221
NC_002505_KPS-14	+	228051	24	17	16	4	1	3	11.7221	3.159	0.813128	3.88499	0.000102333	0.000360344	-	VC0221
NC_002505_KPS-14	+	228102	21	48	9	0	0	0	14.8124	7.49852	1.45628	5.14911	2.61727e-07	2.47176e-06	-	VC0221
NC_002505_KPS-14	+	228170	44	31	25	1	0	1	18.7588	5.97705	1.17149	5.10212	3.35878e-07	3.05366e-06	-	VC0221
NC_002505_KPS-14	+	228462	15	17	20	0	2	2	10.2896	4.05686	0.994022	4.08126	4.47921e-05	0.000181908	-	-
NC_002505_KPS-14	+	232581	54	36	27	5	1	11	23.9278	3.16202	0.710887	4.44798	8.66797e-06	4.65569e-05	-	VC0227
NC_002505_KPS-14	+	232584	24	38	24	9	5	17	20.5731	1.86133	0.625544	2.97554	0.00292474	0.00623959	-	VC0227
NC_002505_KPS-14	+	233027	60	98	45	20	23	22	47.9049	1.98302	0.510737	3.88268	0.000103314	0.000363276	-	VC0228
NC_002505_KPS-14	+	233531	28	18	24	0	3	3	13.7882	3.889	0.865067	4.49561	6.93707e-06	3.86547e-05	-	VC0228
NC_002505_KPS-14	+	235361	31	7	57	3	1	4	18.6273	3.91232	0.939251	4.16536	3.10856e-05	0.00013424	-	-
NC_002505_KPS-14	+	238682	5	21	3	0	0	0	5.57479	6.08626	1.66852	3.64769	0.000264612	0.000798236	-	-
NC_002505_KPS-14	+	238886	4	36	5	1	1	7	9.93497	2.8131	1.16997	2.40442	0.0161982	0.0279577	-	-
NC_002505_KPS-14	+	239127	14	36	15	0	1	0	12.5122	6.27362	1.40289	4.47191	7.75226e-06	4.24197e-05	-	-
NC_002505_KPS-14	+	244998	23	10	24	7	2	9	13.0692	2.00973	0.754251	2.66454	0.00770942	0.014563	-	-
NC_002505_KPS-14	+	246495	23	14	35	5	3	4	15.129	2.90634	0.740726	3.92363	8.72246e-05	0.000315354	-	-
NC_002505_KPS-14	+	246529	50	24	76	17	5	18	33.5246	2.2488	0.6511	3.45384	0.000552663	0.00148993	-	-
NC_002505_KPS-14	+	246530	38	22	69	11	14	13	29.5616	2.08459	0.603462	3.45439	0.000551532	0.00148728	-	-
NC_002505_KPS-14	+	246571	395	294	535	32	50	58	247.659	3.47107	0.404059	8.59051	8.65825e-18	9.14259e-16	-	-
NC_002505_KPS-14	+	246572	25	7	29	3	9	2	13.3541	2.38734	0.875454	2.72698	0.00639172	0.0123496	-	-
NC_002505_KPS-14	+	246697	5	6	21	2	3	1	6.92423	2.72109	1.07595	2.529	0.0114387	0.0205796	-	VC0241
NC_002505_KPS-14	+	246717	19	18	30	4	1	5	13.9264	3.10118	0.775855	3.99712	6.41179e-05	0.000244392	-	VC0241
NC_002505_KPS-14	+	246718	110	75	112	12	9	30	62.1272	2.92278	0.505389	5.78323	7.32799e-09	1.13672e-07	-	VC0241
NC_002505_KPS-14	+	246736	16	6	26	2	5	3	10.3502	2.57364	0.887018	2.90146	0.00371433	0.00768201	-	VC0241
NC_002505_KPS-14	+	246990	20	10	10	5	2	2	8.7152	2.43973	0.874794	2.78892	0.00528838	0.0104646	-	VC0241
NC_002505_KPS-14	+	247395	19	27	24	5	5	2	14.9991	2.85376	0.729565	3.9116	9.16878e-05	0.000328803	-	VC0241
NC_002505_KPS-14	+	247451	20	7	14	3	1	0	8.13883	3.61651	1.09937	3.28962	0.00100322	0.00247502	-	VC0241
NC_002505_KPS-14	+	247460	24	11	24	1	1	7	12.0563	3.10871	0.884967	3.5128	0.000443417	0.00123489	-	VC0241
NC_002505_KPS-14	+	247481	62	79	46	15	20	24	43.6561	2.01514	0.477217	4.2227	2.4139e-05	0.000108787	-	VC0241
NC_002505_KPS-14	+	247556	9	21	11	5	0	2	8.83537	2.88739	1.02324	2.82181	0.00477542	0.00957008	-	VC0241
NC_002505_KPS-14	+	247560	32	47	19	9	7	7	21.8662	2.42148	0.642686	3.76776	0.000164721	0.000536785	-	VC0241
NC_002505_KPS-14	+	247587	46	91	37	2	1	8	34.3909	4.40384	0.771831	5.70571	1.15859e-08	1.6887e-07	-	VC0241
NC_002505_KPS-14	+	247596	29	17	19	3	5	1	13.3817	3.1331	0.803611	3.89878	9.66786e-05	0.000343775	-	VC0241
NC_002505_KPS-14	+	247631	5	20	11	1	0	0	7.04102	5.42751	1.50044	3.61727	0.000297723	0.000882238	-	VC0241
NC_002505_KPS-14	+	247637	10	46	4	3	1	7	13.089	2.89278	1.06287	2.72166	0.00649554	0.0125296	-	VC0241
NC_002505_KPS-14	+	247669	23	9	14	2	1	2	9.14509	3.5189	0.959993	3.66555	0.000246805	0.000752619	-	VC0241
NC_002505_KPS-14	+	247698	26	14	24	3	4	8	13.9256	2.44733	0.702765	3.48243	0.000496884	0.00136025	-	VC0241
NC_002505_KPS-14	+	247699	45	23	33	2	3	3	19.7497	3.97983	0.742665	5.35885	8.37534e-08	9.32372e-07	-	VC0241
NC_002505_KPS-14	+	247798	4	20	10	0	1	1	6.80231	4.47555	1.38754	3.22553	0.00125739	0.00300235	-	VC0241
NC_002505_KPS-14	+	247813	34	23	34	1	0	1	17.1277	5.84348	1.17202	4.98584	6.16942e-07	5.12537e-06	-	VC0241
NC_002505_KPS-14	+	247870	23	10	16	2	3	5	10.414	2.63262	0.804023	3.27431	0.00105922	0.00259266	-	VC0241
NC_002505_KPS-14	+	247881	24	27	28	1	9	10	17.6165	2.35322	0.716107	3.28613	0.00101576	0.00250091	-	VC0241
NC_002505_KPS-14	+	247938	21	8	18	3	3	2	9.83166	2.85162	0.859379	3.31823	0.000905889	0.00226981	-	VC0242
NC_002505_KPS-14	+	247946	28	10	21	1	0	1	11.0795	5.20569	1.24748	4.17297	3.00651e-05	0.000130597	-	VC0242
NC_002505_KPS-14	+	247947	25	11	19	1	0	0	10.2529	5.98771	1.38283	4.33005	1.49076e-05	7.30766e-05	-	VC0242
NC_002505_KPS-14	+	248010	37	56	32	12	14	3	28.0535	2.38722	0.684104	3.48956	0.000483816	0.0013295	-	VC0242
NC_002505_KPS-14	+	248065	31	26	40	3	1	2	18.9321	4.34504	0.80612	5.39007	7.04305e-08	8.03112e-07	-	VC0242
NC_002505_KPS-14	+	248309	23	11	18	4	4	5	11.4706	2.32226	0.733454	3.1662	0.00154444	0.00358064	-	VC0242
NC_002505_KPS-14	+	248399	20	4	16	3	1	8	8.92798	2.11064	0.954129	2.21211	0.0269591	0.0437607	-	VC0242
NC_002505_KPS-14	+	248514	27	15	29	8	1	7	15.4414	2.48484	0.756727	3.28367	0.00102464	0.00251904	-	VC0242
NC_002505_KPS-14	+	248522	41	20	45	11	4	24	24.9715	1.82841	0.668922	2.73337	0.00626907	0.0121435	-	VC0242
NC_002505_KPS-14	+	248714	23	18	23	5	4	6	14.0769	2.42895	0.663582	3.66035	0.000251867	0.000765611	-	VC0242
NC_002505_KPS-14	+	248718	20	12	26	2	2	3	11.751	3.38704	0.839683	4.03371	5.49037e-05	0.00021519	-	VC0242
NC_002505_KPS-14	+	248726	25	25	20	7	8	10	16.7087	1.82681	0.58992	3.0967	0.00195685	0.00440199	-	VC0242
NC_002505_KPS-14	+	248889	13	6	27	4	4	6	10.5567	2.05655	0.833694	2.46679	0.013633	0.0240413	-	VC0242
NC_002505_KPS-14	+	248902	19	3	23	2	1	3	9.07956	3.24002	1.04451	3.10194	0.00192259	0.00433415	-	VC0242
NC_002505_KPS-14	+	249050	19	9	23	5	10	5	12.4381	1.64667	0.738386	2.23009	0.0257415	0.0420258	-	VC0242
NC_002505_KPS-14	+	249139	26	10	18	1	6	2	11.2521	2.87384	0.879991	3.26576	0.00109172	0.00266141	-	VC0242
NC_002505_KPS-14	+	249158	22	49	28	9	8	27	24.8799	1.59313	0.65023	2.4501	0.0142817	0.025036	-	VC0242
NC_002505_KPS-14	+	249159	184	254	160	49	42	64	134.868	2.30323	0.394541	5.83775	5.2911e-09	8.55758e-08	-	VC0242
NC_002505_KPS-14	+	249179	26	18	34	5	7	16	18.3997	1.85528	0.637289	2.91121	0.00360034	0.00747288	-	VC0242
NC_002505_KPS-14	+	249296	12	12	25	1	3	2	10.0411	3.36526	0.922811	3.64675	0.000265582	0.00080056	-	VC0242
NC_002505_KPS-14	+	249419	37	12	39	5	10	16	20.5511	1.85835	0.67971	2.73403	0.00625642	0.0121223	-	VC0243
NC_002505_KPS-14	+	249464	19	12	27	3	6	14	13.9479	1.72153	0.728769	2.36224	0.0181649	0.0309162	-	VC0243
NC_002505_KPS-14	+	249545	27	21	36	1	4	2	16.6535	3.909	0.804183	4.86083	1.16895e-06	8.80847e-06	-	VC0243
NC_002505_KPS-14	+	249679	33	19	31	2	1	2	16.0494	4.3811	0.864463	5.068	4.02021e-07	3.56198e-06	-	VC0243
NC_002505_KPS-14	+	249680	19	6	20	3	8	3	10.3884	1.96674	0.850508	2.31243	0.0207538	0.0347842	-	VC0243
NC_002505_KPS-14	+	249775	40	25	47	6	6	12	24.1588	2.57586	0.588354	4.37807	1.19734e-05	6.09671e-05	-	VC0243
NC_002505_KPS-14	+	249776	15	16	30	0	2	5	12.3459	3.52129	0.918792	3.83252	0.000126835	0.000431202	-	VC0243
NC_002505_KPS-14	+	249854	33	20	32	12	14	6	20.6354	1.68938	0.618918	2.72958	0.00634159	0.0122655	-	VC0243
NC_002505_KPS-14	+	249971	22	14	12	3	2	3	10.029	2.9087	0.825994	3.52145	0.000429197	0.00120137	-	VC0243
NC_002505_KPS-14	+	250021	55	24	70	15	12	16	33.8124	2.11293	0.566587	3.72922	0.000192072	0.000611279	-	VC0243
NC_002505_KPS-14	+	250108	20	12	21	5	6	4	12.064	2.12716	0.713306	2.98211	0.00286268	0.0061228	-	VC0243
NC_002505_KPS-14	+	250150	266	165	205	69	56	74	146.791	1.99688	0.356629	5.5993	2.1522e-08	2.89527e-07	-	VC0243
NC_002505_KPS-14	+	250194	38	25	36	10	3	11	21.7901	2.38743	0.619455	3.85409	0.000116161	0.000400541	-	VC0243
NC_002505_KPS-14	+	250235	51	19	45	9	8	12	25.3234	2.31161	0.59702	3.87191	0.000107984	0.000376728	-	VC0243
NC_002505_KPS-14	+	250353	36	37	40	2	2	0	21.7185	5.13119	0.897448	5.71753	1.08083e-08	1.58846e-07	-	VC0243
NC_002505_KPS-14	+	250375	49	38	41	5	6	8	26.4996	3.09068	0.562132	5.49813	3.83829e-08	4.78145e-07	-	VC0243
NC_002505_KPS-14	+	250381	49	25	43	2	5	1	22.7857	4.15949	0.770461	5.3987	6.71237e-08	7.71759e-07	-	VC0243
NC_002505_KPS-14	+	250386	59	76	53	10	15	21	41.8687	2.39397	0.487665	4.90904	9.15226e-07	7.16233e-06	-	VC0243
NC_002505_KPS-14	+	250449	45	71	42	14	17	30	38.4783	1.75271	0.511175	3.42879	0.000606278	0.0016112	-	-
NC_002505_KPS-14	+	250458	17	20	32	7	5	8	15.85	2.13272	0.655699	3.25259	0.00114359	0.00276823	-	VC0244
NC_002505_KPS-14	+	250466	35	14	20	6	6	10	15.8008	1.97976	0.657952	3.00898	0.00262128	0.00566872	-	VC0244
NC_002505_KPS-14	+	250549	63	38	56	7	5	8	31.9187	3.30171	0.558302	5.91384	3.34225e-09	5.71609e-08	-	VC0244
NC_002505_KPS-14	+	250551	113	59	66	22	15	20	52.1871	2.37189	0.476126	4.98165	6.30452e-07	5.21792e-06	-	VC0244
NC_002505_KPS-14	+	250581	26	11	16	3	5	6	11.7413	2.24756	0.740645	3.0346	0.00240852	0.00527061	-	VC0244
NC_002505_KPS-14	+	250610	35	28	25	15	5	16	21.5535	1.6339	0.594937	2.74635	0.00602628	0.0117311	-	VC0244
NC_002505_KPS-14	+	250620	26	6	30	2	5	7	13.346	2.48975	0.838649	2.96877	0.00298998	0.00636229	-	VC0244
NC_002505_KPS-14	+	250741	21	27	21	0	0	2	13.175	5.48981	1.22039	4.49841	6.84648e-06	3.82369e-05	-	VC0244
NC_002505_KPS-14	+	250742	42	20	53	4	3	5	22.9641	3.59112	0.70077	5.12454	2.98265e-07	2.76131e-06	-	VC0244
NC_002505_KPS-14	+	250862	20	20	29	1	3	4	14.0145	3.46595	0.789864	4.38803	1.14381e-05	5.87261e-05	-	VC0244
NC_002505_KPS-14	+	250864	97	75	77	11	16	23	53.3703	2.66533	0.444182	6.00054	1.96668e-09	3.59178e-08	-	VC0244
NC_002505_KPS-14	+	250865	41	23	19	4	8	8	18.1769	2.37843	0.651216	3.65229	0.000259908	0.000786378	-	VC0244
NC_002505_KPS-14	+	250873	12	20	17	5	8	4	11.8161	1.84711	0.729812	2.53094	0.0113758	0.0204827	-	VC0244
NC_002505_KPS-14	+	250897	36	19	25	3	2	4	16.0196	3.48264	0.74302	4.68714	2.77045e-06	1.80649e-05	-	VC0244
NC_002505_KPS-14	+	250902	127	58	96	3	4	6	53.4609	4.76426	0.61328	7.76849	7.94242e-15	4.89146e-13	-	VC0244
NC_002505_KPS-14	+	250903	26	11	13	0	2	6	10.2126	3.02918	0.952374	3.18066	0.00146938	0.00342917	-	VC0244
NC_002505_KPS-14	+	250910	20	20	12	8	3	3	11.8342	2.19295	0.773725	2.83428	0.00459294	0.00924334	-	VC0244
NC_002505_KPS-14	+	250956	47	33	54	11	18	16	31.5	1.9	0.506713	3.74966	0.000177077	0.000570453	-	VC0244
NC_002505_KPS-14	+	250982	62	79	44	10	15	8	39.6604	2.80039	0.555164	5.04425	4.5531e-07	3.96416e-06	-	VC0244
NC_002505_KPS-14	+	251133	42	36	29	7	2	4	21.8164	3.36025	0.671719	5.00247	5.66012e-07	4.77057e-06	-	VC0244
NC_002505_KPS-14	+	251140	29	34	37	8	7	14	22.8754	2.14943	0.555857	3.86688	0.000110236	0.000383233	-	VC0244
NC_002505_KPS-14	+	251274	35	32	33	4	5	13	21.6821	2.56308	0.607531	4.21885	2.4555e-05	0.000110344	-	VC0244
NC_002505_KPS-14	+	251438	50	44	28	2	2	6	24.0405	3.97322	0.707562	5.61536	1.96148e-08	2.67438e-07	-	VC0244
NC_002505_KPS-14	+	251520	32	50	33	11	10	8	26.0141	2.31336	0.572331	4.04199	5.29984e-05	0.000208883	-	VC0244
NC_002505_KPS-14	+	251553	89	53	56	14	15	17	43.2707	2.42618	0.469695	5.16544	2.39875e-07	2.29369e-06	-	VC0244
NC_002505_KPS-14	+	251654	68	53	52	16	16	21	39.8474	2.04094	0.443822	4.59856	4.2543e-06	2.5774e-05	-	VC0245
NC_002505_KPS-14	+	251677	20	14	11	2	2	4	9.45627	2.83781	0.83919	3.3816	0.000720645	0.00186852	-	VC0245
NC_002505_KPS-14	+	251684	33	22	28	11	3	10	18.8626	2.12348	0.639767	3.31914	0.000902937	0.00226368	-	VC0245
NC_002505_KPS-14	+	251770	594	1073	527	115	147	210	482.488	2.59373	0.433246	5.98673	2.141e-09	3.86566e-08	-	VC0245
NC_002505_KPS-14	+	251880	76	79	83	27	23	28	55.967	1.9424	0.405849	4.786	1.70137e-06	1.20731e-05	-	VC0245
NC_002505_KPS-14	+	252085	25	17	17	0	1	4	11.5609	3.94122	0.952386	4.13826	3.49952e-05	0.000148055	-	VC0245
NC_002505_KPS-14	+	252103	22	20	6	0	1	1	9.18842	4.92912	1.30564	3.77524	0.000159855	0.000523531	-	VC0245
NC_002505_KPS-14	+	252205	23	22	18	1	4	3	12.9015	3.31477	0.793871	4.17545	2.97394e-05	0.000129437	-	VC0245
NC_002505_KPS-14	+	252207	23	22	20	3	3	12	14.5725	2.25042	0.711672	3.16216	0.00156604	0.00362333	-	VC0245
NC_002505_KPS-14	+	252254	25	23	39	11	6	11	20.3347	1.97457	0.597289	3.30589	0.000946753	0.00235617	-	VC0245
NC_002505_KPS-14	+	252308	79	33	68	13	1	5	35.9301	3.52844	0.748983	4.71097	2.46535e-06	1.64155e-05	-	VC0245
NC_002505_KPS-14	+	252511	76	49	86	5	3	3	40.7102	4.57656	0.639266	7.15908	8.12179e-13	3.41175e-11	-	VC0245
NC_002505_KPS-14	+	252512	26	17	24	5	1	9	14.488	2.53065	0.744241	3.40031	0.000673089	0.0017622	-	VC0245
NC_002505_KPS-14	+	252760	72	48	83	3	3	6	39.3057	4.42663	0.624105	7.09276	1.3146e-12	5.27194e-11	-	VC0245
NC_002505_KPS-14	+	252761	38	13	10	0	3	0	11.5408	4.6045	1.20296	3.82764	0.000129377	0.000438403	-	VC0245
NC_002505_KPS-14	+	252772	34	22	15	0	2	3	13.7738	4.1794	0.930886	4.4897	7.13235e-06	3.95207e-05	-	VC0245
NC_002505_KPS-14	+	252810	15	19	20	1	1	0	10.435	5.07665	1.219	4.1646	3.119e-05	0.000134562	-	VC0245
NC_002505_KPS-14	+	252898	35	13	17	4	4	4	13.6428	2.74025	0.753327	3.63754	0.000275258	0.000825118	-	VC0245
NC_002505_KPS-14	+	252922	114	63	118	7	6	12	58.0319	3.90427	0.528222	7.39135	1.45348e-13	6.99311e-12	-	VC0245
NC_002505_KPS-14	+	252955	15	7	22	0	0	1	8.24807	5.67347	1.43904	3.94253	8.06251e-05	0.000295956	-	VC0246
NC_002505_KPS-14	+	252961	52	24	51	5	3	5	25.2823	3.61007	0.66523	5.42681	5.73705e-08	6.76087e-07	-	VC0246
NC_002505_KPS-14	+	253031	84	33	50	6	1	6	32.4139	4.00816	0.697397	5.74732	9.0671e-09	1.36604e-07	-	VC0246
NC_002505_KPS-14	+	253062	26	18	25	3	2	5	14.2055	3.13414	0.732131	4.28085	1.86182e-05	8.77348e-05	-	VC0246
NC_002505_KPS-14	+	253124	67	39	72	8	7	14	37.051	2.9653	0.536099	5.53126	3.17937e-08	4.06623e-07	-	VC0246
NC_002505_KPS-14	+	253155	28	16	40	1	0	0	15.7022	6.60889	1.3521	4.88787	1.0193e-06	7.84483e-06	-	VC0246
NC_002505_KPS-14	+	253156	33	17	43	7	8	8	20.59	2.33522	0.628019	3.71838	0.000200501	0.000633639	-	VC0246
NC_002505_KPS-14	+	253164	25	16	29	1	3	1	13.7201	4.11883	0.898167	4.58581	4.52223e-06	2.71035e-05	-	VC0246
NC_002505_KPS-14	+	253285	16	21	18	3	7	4	12.4138	2.30209	0.72573	3.1721	0.00151339	0.00351829	-	VC0246
NC_002505_KPS-14	+	253290	34	22	44	3	7	5	20.7523	3.06031	0.665713	4.59705	4.28523e-06	2.59395e-05	-	VC0246
NC_002505_KPS-14	+	253310	100	96	113	25	13	20	66.2036	2.74043	0.445925	6.1455	7.97143e-10	1.61884e-08	-	VC0246
NC_002505_KPS-14	+	253349	37	32	46	1	2	2	22.122	4.86242	0.827873	5.87339	4.26964e-09	7.10184e-08	-	VC0246
NC_002505_KPS-14	+	253355	27	14	28	1	1	1	13.1672	4.84573	1.04509	4.63667	3.54065e-06	2.21377e-05	-	VC0246
NC_002505_KPS-14	+	253356	29	14	25	4	2	11	14.8558	2.37876	0.739777	3.21552	0.0013021	0.003093	-	VC0246
NC_002505_KPS-14	+	253389	18	13	22	5	2	6	11.7127	2.37347	0.744412	3.18838	0.00143073	0.00335092	-	VC0246
NC_002505_KPS-14	+	253390	23	10	25	4	1	3	11.8565	3.17778	0.852319	3.7284	0.000192701	0.000612855	-	VC0246
NC_002505_KPS-14	+	253526	84	61	108	3	13	9	50.6255	3.66938	0.583808	6.28526	3.27302e-10	7.39872e-09	-	VC0246
NC_002505_KPS-14	+	253556	94	53	82	7	7	7	45.351	3.7632	0.535697	7.02487	2.14267e-12	8.20259e-11	-	VC0246
NC_002505_KPS-14	+	253557	267	138	213	53	57	70	140.205	2.10213	0.380686	5.52196	3.35241e-08	4.26027e-07	-	VC0246
NC_002505_KPS-14	+	253624	54	39	60	9	5	10	31.8738	3.00961	0.546646	5.5056	3.67911e-08	4.61297e-07	-	VC0246
NC_002505_KPS-14	+	253680	33	16	14	2	0	0	11.8568	5.26398	1.25248	4.20283	2.63597e-05	0.000117078	-	VC0246
NC_002505_KPS-14	+	253698	32	28	31	5	2	2	18.296	3.65034	0.728457	5.01107	5.41296e-07	4.58949e-06	-	VC0246
NC_002505_KPS-14	+	253700	40	26	57	12	3	12	26.7265	2.53077	0.645021	3.92354	8.72566e-05	0.000315439	-	VC0246
NC_002505_KPS-14	+	253701	34	23	35	3	4	11	19.5354	2.72904	0.655393	4.16397	3.12755e-05	0.00013485	-	VC0246
NC_002505_KPS-14	+	253865	40	41	27	9	4	3	22.5966	3.05375	0.670747	4.55277	5.29451e-06	3.08897e-05	-	VC0247
NC_002505_KPS-14	+	253867	19	21	32	10	2	6	16.1518	2.32789	0.72727	3.20086	0.00137019	0.00323002	-	VC0247
NC_002505_KPS-14	+	254148	29	10	30	3	2	11	14.8432	2.49638	0.804191	3.10421	0.00190785	0.00430541	-	VC0247
NC_002505_KPS-14	+	255144	13	24	17	3	5	5	12.1011	2.40864	0.742981	3.24187	0.0011875	0.00285874	-	VC0249
NC_002505_KPS-14	+	255145	18	27	13	4	4	4	12.6901	2.61259	0.74896	3.48828	0.000486132	0.00133488	-	VC0249
NC_002505_KPS-14	+	255146	34	37	46	7	4	9	24.7574	2.90128	0.586127	4.94991	7.42475e-07	5.9907e-06	-	VC0249
NC_002505_KPS-14	+	255489	61	35	46	5	7	17	30.2282	2.6615	0.576732	4.61479	3.93491e-06	2.41976e-05	-	VC0249
NC_002505_KPS-14	+	255551	20	13	13	5	2	8	10.6237	1.97302	0.754655	2.61446	0.00893674	0.0165755	-	VC0249
NC_002505_KPS-14	+	255615	22	13	23	6	0	5	12.3144	2.73695	0.86055	3.18046	0.0014704	0.00343132	-	VC0249
NC_002505_KPS-14	+	255616	136	72	129	20	15	38	72.5179	2.56664	0.475398	5.39893	6.70397e-08	7.71049e-07	-	VC0249
NC_002505_KPS-14	+	255667	18	19	27	4	3	7	13.9571	2.55424	0.699478	3.65164	0.000260574	0.000788038	-	VC0249
NC_002505_KPS-14	+	255919	33	40	27	17	6	14	24.179	1.77351	0.587393	3.01929	0.00253369	0.00550666	-	VC0249
NC_002505_KPS-14	+	255946	26	30	32	7	1	4	18.2484	3.20571	0.728436	4.40082	1.07844e-05	5.5875e-05	-	VC0249
NC_002505_KPS-14	+	256206	26	21	20	5	3	10	14.9712	2.26236	0.666618	3.39379	0.000689332	0.00179887	-	VC0250
NC_002505_KPS-14	+	256936	26	9	45	8	10	6	18.3985	2.02857	0.746484	2.7175	0.00657767	0.0126712	-	VC0250
NC_002505_KPS-14	+	256943	30	10	42	6	2	2	16.6248	3.31918	0.853229	3.89014	0.000100186	0.000354136	-	VC0250
NC_002505_KPS-14	+	256948	94	33	120	1	6	4	47.0284	4.80818	0.752092	6.39307	1.62593e-10	3.95727e-09	-	VC0250
NC_002505_KPS-14	+	256949	642	266	651	29	18	30	297.832	4.65853	0.475822	9.79049	1.23695e-22	2.84624e-20	-	VC0250
NC_002505_KPS-14	+	256950	166	37	185	16	9	21	77.6097	3.40714	0.643716	5.29292	1.20376e-07	1.27359e-06	-	VC0250
NC_002505_KPS-14	+	256952	107	42	109	18	15	18	54.9585	2.64915	0.524294	5.0528	4.35377e-07	3.81337e-06	-	VC0250
NC_002505_KPS-14	+	256953	53	9	54	5	13	10	25.2877	2.35475	0.75899	3.10247	0.00191911	0.00432757	-	VC0250
NC_002505_KPS-14	+	256957	17	21	18	8	6	6	13.4907	1.81075	0.654358	2.76721	0.00565375	0.011097	-	VC0250
NC_002505_KPS-14	+	256966	50	56	20	2	9	15	27.1545	2.66852	0.717525	3.71907	0.000199958	0.00063224	-	VC0250
NC_002505_KPS-14	+	257028	39	28	37	6	2	7	21.4323	3.13731	0.642321	4.88434	1.03778e-06	7.96429e-06	-	VC0250
NC_002505_KPS-14	+	257091	16	13	21	4	6	2	11.1505	2.35392	0.779904	3.01822	0.00254264	0.00552355	-	VC0250
NC_002505_KPS-14	+	257329	23	9	32	2	1	1	12.3971	4.30825	1.01452	4.24659	2.17046e-05	9.96384e-05	-	VC0251
NC_002505_KPS-14	+	257365	24	29	27	4	2	13	17.5687	2.48342	0.708774	3.50383	0.000458625	0.00127033	-	VC0251
NC_002505_KPS-14	+	257528	57	29	66	9	8	4	31.276	3.14015	0.628657	4.99502	5.88307e-07	4.92883e-06	-	VC0251
NC_002505_KPS-14	+	257797	176	54	147	42	41	40	87.2897	1.9095	0.509021	3.75132	0.000175907	0.000567275	-	VC0251
NC_002505_KPS-14	+	257812	28	10	30	6	4	6	14.8466	2.40463	0.725807	3.31305	0.000922855	0.00230611	-	VC0251
NC_002505_KPS-14	+	257866	61	35	59	9	8	15	33.2249	2.62024	0.526078	4.9807	6.33556e-07	5.23718e-06	-	VC0251
NC_002505_KPS-14	+	258159	63	22	72	19	14	33	38.2921	1.60186	0.5826	2.74951	0.00596849	0.0116318	-	VC0251
NC_002505_KPS-14	+	258169	20	9	19	3	2	4	10.1338	2.74731	0.82233	3.34089	0.000835112	0.00211811	-	VC0251
NC_002505_KPS-14	+	258183	72	22	88	11	19	26	41.4842	2.04247	0.614592	3.3233	0.000889582	0.00223591	-	VC0251
NC_002505_KPS-14	+	258194	23	12	35	8	2	5	15.1872	2.53741	0.772677	3.28392	0.00102374	0.00251734	-	VC0251
NC_002505_KPS-14	+	258199	49	13	47	0	2	3	20.618	4.78906	0.952754	5.02655	4.99383e-07	4.28223e-06	-	VC0251
NC_002505_KPS-14	+	258259	24	13	11	3	4	6	10.6891	2.22051	0.762741	2.91123	0.00360013	0.00747275	-	VC0251
NC_002505_KPS-14	+	258656	31	11	25	5	3	9	14.6834	2.32525	0.725193	3.20638	0.00134416	0.00317899	-	VC0251
NC_002505_KPS-14	+	258864	30	17	27	8	3	14	17.1824	1.9311	0.665936	2.89982	0.00373373	0.00771868	-	VC0251
NC_002505_KPS-14	+	259016	22	12	7	2	6	5	9.42445	1.97763	0.838167	2.35947	0.018301	0.0311233	-	VC0251
NC_002505_KPS-14	+	259198	26	6	21	3	8	2	11.6702	2.28755	0.884647	2.58583	0.00971435	0.017829	-	VC0251
NC_002505_KPS-14	+	259224	44	17	56	6	8	16	25.7895	2.32336	0.649871	3.57511	0.000350074	0.00101234	-	VC0251
NC_002505_KPS-14	+	259263	23	19	29	3	5	8	15.4867	2.50763	0.668472	3.75128	0.000175933	0.000567344	-	VC0251
NC_002505_KPS-14	+	259354	9	3	26	2	2	2	7.93396	2.98481	1.08118	2.7607	0.00576777	0.0112929	-	VC0251
NC_002505_KPS-14	+	259448	223	141	236	44	36	53	130.494	2.50486	0.384053	6.52218	6.92931e-11	1.85786e-09	-	VC0251
NC_002505_KPS-14	+	259561	37	12	28	0	3	3	14.9241	4.01422	0.915561	4.38444	1.16285e-05	5.95074e-05	-	VC0251
NC_002505_KPS-14	+	259644	66	49	40	22	13	17	36.4497	1.88889	0.497232	3.79881	0.000145392	0.000483656	-	VC0251
NC_002505_KPS-14	+	259675	49	32	23	5	2	6	21.0486	3.33659	0.687189	4.85542	1.20133e-06	9.01306e-06	-	VC0251
NC_002505_KPS-14	+	259693	108	86	123	26	10	14	66.4315	2.96923	0.511079	5.80972	6.25787e-09	9.93133e-08	-	VC0251
NC_002505_KPS-14	+	259694	375	252	374	34	23	20	196.917	3.99555	0.431019	9.27001	1.86136e-20	2.98917e-18	-	VC0251
NC_002505_KPS-14	+	259695	228	410	236	53	56	51	188.807	2.78543	0.436061	6.38771	1.68383e-10	4.07979e-09	-	VC0251
NC_002505_KPS-14	+	259696	16	75	12	11	6	14	24.3295	2.1324	0.823884	2.58822	0.00964729	0.0177198	-	VC0251
NC_002505_KPS-14	+	259699	4	38	4	2	3	3	10.1206	2.91665	1.12265	2.59801	0.00937663	0.0172799	-	VC0251
NC_002505_KPS-14	+	259700	180	314	151	59	68	72	151.093	2.04469	0.443479	4.61057	4.01561e-06	2.46028e-05	-	VC0251
NC_002505_KPS-14	+	259729	49	19	36	2	2	2	19.9356	4.42643	0.825387	5.36285	8.19193e-08	9.14312e-07	-	VC0251
NC_002505_KPS-14	+	259734	70	35	79	21	28	18	44.0642	1.75106	0.522252	3.35291	0.000799668	0.00204134	-	VC0251
NC_002505_KPS-14	+	259797	25	13	33	4	6	6	15.4734	2.4764	0.697676	3.5495	0.000385966	0.00109808	-	-
NC_002505_KPS-14	+	260570	80	51	86	4	0	2	41.0345	5.49927	0.779202	7.05757	1.69443e-12	6.6229e-11	-	-
NC_002505_KPS-14	+	260571	21	18	13	1	0	0	9.81017	5.92073	1.37476	4.30675	1.65668e-05	7.96222e-05	-	-
NC_002505_KPS-14	+	260572	28	13	21	5	5	6	13.7468	2.27345	0.684605	3.32082	0.000897542	0.00225245	-	-
NC_002505_KPS-14	+	260632	33	13	45	0	1	1	17.0435	5.84041	1.23129	4.74334	2.10222e-06	1.43786e-05	-	-
NC_002505_KPS-14	+	260702	65	35	49	3	2	7	29.1085	3.9863	0.659105	6.04806	1.46601e-09	2.76538e-08	-	-
NC_002505_KPS-14	+	260703	25	18	31	2	4	9	15.8171	2.67796	0.708646	3.77899	0.000157468	0.000517194	-	-
NC_002505_KPS-14	+	260942	51	31	42	12	11	15	28.4693	2.03489	0.504827	4.03086	5.55739e-05	0.000217375	-	VC0254
NC_002505_KPS-14	+	260963	29	36	30	9	8	7	21.3985	2.3099	0.577513	3.99973	6.34142e-05	0.000242314	-	VC0254
NC_002505_KPS-14	+	260985	27	15	21	3	1	6	13.0036	3.01503	0.783792	3.84672	0.000119709	0.00041074	-	VC0254
NC_002505_KPS-14	+	261016	40	40	29	7	9	5	23.5004	2.68587	0.59645	4.50309	6.69713e-06	3.75213e-05	-	VC0254
NC_002505_KPS-14	+	261036	14	52	36	0	2	2	20.0186	5.05744	1.01662	4.97476	6.53288e-07	5.37477e-06	-	VC0254
NC_002505_KPS-14	+	261037	48	197	55	2	0	3	58.2288	6.31406	0.965333	6.54081	6.11867e-11	1.66618e-09	-	VC0254
NC_002505_KPS-14	+	261083	14	29	4	0	0	0	8.90814	6.76466	1.54381	4.38179	1.1771e-05	6.01065e-05	-	VC0254
NC_002505_KPS-14	+	261364	14	11	21	1	0	1	8.83703	4.86685	1.25807	3.8685	0.000109508	0.000381156	-	VC0254
NC_002505_KPS-14	+	261419	17	25	16	3	0	1	11.5063	4.18957	1.00788	4.15679	3.22745e-05	0.000138488	-	VC0254
NC_002505_KPS-14	+	261446	32	80	39	2	6	7	30.8306	3.71323	0.70482	5.26834	1.37664e-07	1.43049e-06	-	VC0254
NC_002505_KPS-14	+	261468	28	28	45	3	1	1	19.6163	4.65774	0.863904	5.3915	6.98707e-08	7.97655e-07	-	VC0254
NC_002505_KPS-14	+	261508	5	20	3	2	0	2	5.95336	3.20233	1.28088	2.50011	0.0124156	0.0221207	-	VC0254
NC_002505_KPS-14	+	261517	23	166	16	3	0	5	40.8553	5.12546	1.07913	4.74962	2.03804e-06	1.40301e-05	-	VC0254
NC_002505_KPS-14	+	261532	18	50	25	1	0	0	17.8486	6.79193	1.37075	4.95489	7.23697e-07	5.86594e-06	-	VC0254
NC_002505_KPS-14	+	261659	177	485	177	20	18	14	167.563	4.34876	0.583722	7.45005	9.33017e-14	4.68101e-12	-	VC0254
NC_002505_KPS-14	+	261660	16	103	11	3	4	6	27.0402	3.73264	0.948729	3.93435	8.34216e-05	0.000304183	-	VC0254
NC_002505_KPS-14	+	261667	18	125	6	3	1	9	30.686	3.99586	1.08758	3.67409	0.000238697	0.000732345	-	VC0254
NC_002505_KPS-14	+	261674	4	39	1	0	1	1	8.85966	4.8789	1.60303	3.04355	0.00233806	0.00513705	-	VC0254
NC_002505_KPS-14	+	261675	9	75	4	1	3	4	18.2506	3.88552	1.13773	3.41516	0.000637439	0.00168159	-	VC0254
NC_002505_KPS-14	+	261677	4	48	7	1	1	2	12.0479	4.29921	1.23282	3.4873	0.000487919	0.00133941	-	VC0254
NC_002505_KPS-14	+	261678	2	26	0	1	0	0	5.63709	5.09893	1.96221	2.59857	0.00936126	0.0172578	-	VC0254
NC_002505_KPS-14	+	261688	5	40	1	0	1	1	9.23109	4.93986	1.5856	3.11545	0.00183667	0.0041636	-	VC0254
NC_002505_KPS-14	+	261785	35	17	36	0	0	3	16.5834	5.25054	1.08013	4.86103	1.16775e-06	8.80151e-06	-	VC0254
NC_002505_KPS-14	+	261786	12	12	24	5	3	2	10.5023	2.56881	0.833199	3.08306	0.00204882	0.00457968	-	VC0254
NC_002505_KPS-14	+	261818	11	20	10	0	0	1	7.86241	5.5988	1.43085	3.91291	9.11889e-05	0.000327329	-	VC0254
NC_002505_KPS-14	+	263575	23	18	28	1	1	0	13.1332	5.42242	1.19336	4.54381	5.52454e-06	3.20039e-05	-	VC0258
NC_002505_KPS-14	+	263713	80	37	74	1	1	1	35.5698	6.31165	0.981264	6.43216	1.25806e-10	3.1625e-09	-	VC0258
NC_002505_KPS-14	+	263994	35	34	53	2	2	0	23.3922	5.23958	0.909686	5.75976	8.42326e-09	1.28084e-07	-	VC0258
NC_002505_KPS-14	+	264640	24	14	47	0	0	1	15.8878	6.62897	1.38052	4.80179	1.5725e-06	1.1302e-05	-	-
NC_002505_KPS-14	+	264647	12	2	22	0	0	0	6.61377	6.33907	1.62194	3.90832	9.29393e-05	0.000332275	-	-
NC_002505_KPS-14	+	264682	14	1	26	0	1	0	7.67546	5.56176	1.63134	3.40931	0.000651269	0.00171322	-	-
NC_002505_KPS-14	+	266723	20	19	9	3	3	6	10.6401	2.35724	0.784785	3.00367	0.00266741	0.00575521	-	-
NC_002505_KPS-14	+	266818	8	32	6	1	6	5	10.5783	2.32649	0.989314	2.35162	0.018692	0.0317008	-	-
NC_002505_KPS-14	+	267141	7	24	8	0	1	0	7.6128	5.5434	1.49628	3.70479	0.000211564	0.00066222	-	-
NC_002505_KPS-14	+	267313	22	54	26	18	9	15	25.6019	1.63284	0.62857	2.5977	0.00938499	0.0172927	-	-
NC_002505_KPS-14	+	267314	37	77	25	24	8	19	33.8792	1.7999	0.658531	2.73321	0.00627206	0.0121489	-	-
NC_002505_KPS-14	+	267370	36	29	53	11	9	13	26.7922	2.17561	0.544872	3.99287	6.52774e-05	0.000248128	-	-
NC_002505_KPS-14	+	267415	15	25	25	7	5	1	14.2941	2.6083	0.802599	3.24982	0.00115478	0.00279212	-	VC0262
NC_002505_KPS-14	+	267445	12	21	6	2	2	1	8.1271	3.28977	1.0278	3.20079	0.00137051	0.00323055	-	VC0262
NC_002505_KPS-14	+	267454	51	48	29	4	5	2	25.492	3.84638	0.688071	5.5901	2.26943e-08	3.02657e-07	-	VC0262
NC_002505_KPS-14	+	267749	4	8	20	2	1	0	6.51152	3.71221	1.27336	2.91529	0.00355361	0.00738935	-	VC0262
NC_002505_KPS-14	+	267857	40	45	34	6	9	13	26.2676	2.4459	0.546062	4.47917	7.49345e-06	4.12062e-05	-	VC0262
NC_002505_KPS-14	+	267957	13	24	14	4	2	4	11.0955	2.70599	0.802005	3.37403	0.000740775	0.00191368	-	VC0262
NC_002505_KPS-14	+	268852	28	31	32	1	1	5	17.9466	4.08286	0.797289	5.12094	3.04023e-07	2.80781e-06	-	VC0263
NC_002505_KPS-14	+	268985	30	54	17	8	7	16	23.4914	2.09259	0.664871	3.14736	0.0016475	0.00378871	-	-
NC_002505_KPS-14	+	268987	14	20	7	3	3	3	9.03937	2.52571	0.867093	2.91285	0.00358145	0.00743897	-	-
NC_002505_KPS-14	+	269030	86	294	73	12	17	30	95.0843	3.35409	0.660899	5.07505	3.87403e-07	3.45441e-06	-	-
NC_002505_KPS-14	+	269031	8	121	2	10	5	5	28.6757	3.0762	1.16348	2.64396	0.00819418	0.0153595	-	-
NC_002505_KPS-14	+	269172	16	93	12	5	10	6	26.539	2.89021	0.891655	3.2414	0.00118944	0.00286238	-	VC0264
NC_002505_KPS-14	+	269211	5	22	3	1	0	2	6.1855	3.74422	1.35941	2.75429	0.00588194	0.011487	-	VC0264
NC_002505_KPS-14	+	269301	5	33	3	0	1	1	8.22621	4.76458	1.49213	3.19313	0.00140739	0.00330389	-	VC0264
NC_002505_KPS-14	+	269351	18	77	15	4	4	8	23.4265	3.18921	0.839165	3.80046	0.000144427	0.000480875	-	VC0264
NC_002505_KPS-14	+	269352	3	20	0	1	1	0	4.78808	3.84971	1.75968	2.18773	0.0286891	0.04623	-	VC0264
NC_002505_KPS-14	+	269357	15	115	4	2	4	3	27.3792	4.28312	1.11201	3.85168	0.000117309	0.000403918	-	VC0264
NC_002505_KPS-14	+	269403	29	24	19	2	3	16	16.1653	2.20457	0.772985	2.85202	0.00434428	0.00880383	-	VC0264
NC_002505_KPS-14	+	269483	6	29	20	7	2	4	12.474	2.43225	0.885405	2.74705	0.00601344	0.0117099	-	VC0264
NC_002505_KPS-14	+	269484	30	71	16	2	1	3	23.0903	4.66692	0.921289	5.06564	4.07027e-07	3.60072e-06	-	VC0264
NC_002505_KPS-14	+	269497	34	91	40	11	8	16	36.4459	2.6204	0.61874	4.23506	2.28492e-05	0.000103916	-	VC0264
NC_002505_KPS-14	+	269557	17	19	22	2	1	3	11.6981	3.6286	0.856214	4.23796	2.25561e-05	0.000102843	-	VC0264
NC_002505_KPS-14	+	269686	26	80	16	13	10	28	30.5313	1.67925	0.733313	2.28996	0.0220239	0.0366563	-	VC0264
NC_002505_KPS-14	+	269758	116	119	103	7	4	12	66.2876	4.23925	0.508198	8.34174	7.32038e-17	6.55597e-15	-	VC0264
NC_002505_KPS-14	+	269759	523	580	524	25	34	56	320.348	4.19268	0.37432	11.2008	4.04059e-29	2.22474e-26	-	VC0264
NC_002505_KPS-14	+	269774	50	63	65	2	9	4	35.5966	3.89646	0.640162	6.08668	1.15279e-09	2.24519e-08	-	VC0264
NC_002505_KPS-14	+	269789	48	59	40	1	1	1	27.9511	5.9568	0.974736	6.11119	9.88925e-10	1.96505e-08	-	VC0264
NC_002505_KPS-14	+	269855	11	27	10	1	0	2	9.53045	4.39307	1.1633	3.77638	0.000159122	0.000521516	-	VC0264
NC_002505_KPS-14	+	269895	4	35	1	0	1	4	8.44799	3.49595	1.43037	2.44409	0.014522	0.025401	-	VC0264
NC_002505_KPS-14	+	270010	11	31	8	1	1	2	10.1036	4.0271	1.08479	3.71234	0.000205355	0.000646629	-	VC0264
NC_002505_KPS-14	+	270011	2	28	1	0	0	1	6.18255	5.244	1.80375	2.90727	0.00364596	0.00755756	-	VC0264
NC_002505_KPS-14	+	270449	19	11	24	1	0	6	10.8996	3.36033	0.976069	3.44272	0.000575892	0.00154299	-	-
NC_002505_KPS-14	+	270532	22	49	10	6	1	7	17.3841	2.91973	0.870754	3.3531	0.000799113	0.00204031	-	-
NC_002505_KPS-14	+	272042	13	26	9	8	5	6	11.9309	1.67628	0.762303	2.19896	0.0278805	0.045074	-	-
NC_002505_KPS-14	+	273530	345	321	252	83	75	105	209.337	2.14301	0.331103	6.47233	9.65024e-11	2.50583e-09	-	-
NC_002505_KPS-14	+	273926	27	16	28	5	5	5	15.3519	2.56185	0.669378	3.82721	0.000129601	0.000438989	-	VC0268
NC_002505_KPS-14	+	274025	22	21	21	4	2	2	13.1345	3.3184	0.779603	4.25653	2.07628e-05	9.60422e-05	-	VC0268
NC_002505_KPS-14	+	274168	80	103	73	1	0	0	48.1099	8.23279	1.26985	6.48329	8.97466e-11	2.35077e-09	-	-
NC_002505_KPS-14	+	274486	108	79	111	12	18	21	62.6863	2.88522	0.436282	6.61321	3.76071e-11	1.0797e-09	-	-
NC_002505_KPS-14	+	275704	23	50	22	2	1	0	18.4789	5.31143	1.06576	4.98372	6.23737e-07	5.17226e-06	-	VC0269
NC_002505_KPS-14	+	275705	28	58	17	4	0	2	20.4053	4.45129	0.940941	4.73068	2.2377e-06	1.51383e-05	-	VC0269
NC_002505_KPS-14	+	275760	21	3	28	1	3	0	10.1466	3.95314	1.1964	3.3042	0.000952474	0.0023685	-	VC0270
NC_002505_KPS-14	+	275878	22	23	11	4	0	3	11.4586	3.34293	0.917769	3.64245	0.000270054	0.000811936	-	VC0270
NC_002505_KPS-14	+	275933	8	27	4	0	1	0	7.62796	5.54678	1.55501	3.56703	0.000361043	0.00103834	-	VC0270
NC_002505_KPS-14	+	276138	17	27	15	4	3	3	12.6057	2.89664	0.772632	3.74905	0.000177503	0.000571638	-	VC0270
NC_002505_KPS-14	+	276162	28	33	24	6	2	4	17.6848	3.15716	0.698385	4.52066	6.1646e-06	3.50435e-05	-	VC0270
NC_002505_KPS-14	+	276182	17	27	12	1	2	9	12.1505	2.65299	0.867796	3.05717	0.00223441	0.00493857	-	VC0270
NC_002505_KPS-14	+	276195	21	30	14	4	3	3	13.7066	3.03375	0.770683	3.93644	8.26987e-05	0.000301976	-	VC0270
NC_002505_KPS-14	+	276315	99	91	96	35	32	41	69.1494	1.73981	0.372096	4.6757	2.9295e-06	1.89296e-05	-	VC0270
NC_002505_KPS-14	+	276317	14	25	7	5	3	8	10.978	1.90324	0.813208	2.34042	0.0192623	0.0325533	-	VC0270
NC_002505_KPS-14	+	276321	12	48	13	5	8	11	17.4659	2.0007	0.788925	2.53598	0.0112133	0.0202285	-	VC0270
NC_002505_KPS-14	+	276333	15	23	13	4	1	2	10.6481	3.19766	0.880263	3.63262	0.000280553	0.000838567	-	VC0270
NC_002505_KPS-14	+	276661	30	16	25	5	0	3	14.2618	3.46889	0.853361	4.06498	4.80375e-05	0.000192751	-	-
NC_002505_KPS-14	+	276664	33	13	40	3	0	1	16.4321	4.73101	1.00673	4.6994	2.60926e-06	1.72001e-05	-	-
NC_002505_KPS-14	+	278724	30	15	16	9	7	9	14.8967	1.60055	0.638902	2.50516	0.0122395	0.0218401	-	VC0274
NC_002505_KPS-14	+	278900	21	50	16	10	7	12	20.7684	1.9541	0.68388	2.85738	0.00427159	0.00867542	-	VC0274
NC_002505_KPS-14	+	279199	19	10	20	0	6	3	10.371	2.76432	0.92957	2.97376	0.00294176	0.00627229	-	VC0274
NC_002505_KPS-14	+	279302	20	19	9	2	0	2	9.49601	3.93264	1.03946	3.78333	0.000154744	0.00050977	-	VC0274
NC_002505_KPS-14	+	282916	7	38	7	0	0	1	10.1514	5.97174	1.53308	3.89527	9.809e-05	0.000347924	VC0277	zntR
NC_002505_KPS-14	+	282920	0	22	2	1	0	0	4.8752	4.88185	1.97537	2.47136	0.0134601	0.023771	VC0277	zntR
NC_002505_KPS-14	+	282921	0	22	1	0	0	1	4.65102	4.82338	2.04632	2.3571	0.0184183	0.0312967	VC0277	zntR
NC_002505_KPS-14	+	282957	11	24	6	2	0	5	8.72756	2.97578	1.06293	2.79959	0.00511674	0.0101648	VC0277	zntR
NC_002505_KPS-14	+	282958	4	23	3	1	0	0	5.95706	5.17956	1.64306	3.15238	0.00161945	0.00373218	VC0277	zntR
NC_002505_KPS-14	+	283056	10	26	3	3	2	4	8.74067	2.49467	1.01432	2.45945	0.0139151	0.0244787	VC0277	zntR
NC_002505_KPS-14	+	283095	20	20	7	0	0	0	8.74214	6.73974	1.45384	4.63584	3.55499e-06	2.22106e-05	VC0277	zntR
NC_002505_KPS-14	+	283147	54	106	35	4	4	2	38.4168	4.61448	0.750923	6.14508	7.99214e-10	1.62244e-08	VC0277	zntR
NC_002505_KPS-14	+	283187	26	41	22	0	0	0	16.743	7.67565	1.34742	5.69655	1.22258e-08	1.77216e-07	-	-
NC_002505_KPS-14	+	283188	14	37	3	0	0	1	10.4235	6.01177	1.55351	3.86981	0.000108921	0.000379512	-	-
NC_002505_KPS-14	+	283194	12	34	3	0	4	0	9.99673	3.91792	1.34638	2.90997	0.00361465	0.00750014	-	-
NC_002505_KPS-14	+	283212	13	21	10	0	1	2	8.6935	4.25547	1.13696	3.74286	0.000181936	0.000583744	-	-
NC_002505_KPS-14	+	283213	11	40	7	4	2	4	12.5881	2.91344	0.941666	3.09392	0.00197534	0.00443888	-	-
NC_002505_KPS-14	+	283296	25	32	15	0	0	1	13.6063	6.4017	1.3596	4.70852	2.49522e-06	1.6575e-05	-	-
NC_002505_KPS-14	+	283312	31	47	23	2	0	2	19.5607	5.01819	0.948862	5.28864	1.23231e-07	1.29923e-06	-	-
NC_002505_KPS-14	+	283318	24	74	11	11	15	15	26.9021	1.77884	0.760013	2.34053	0.0192561	0.0325445	-	-
NC_002505_KPS-14	+	283319	95	246	82	41	39	54	100.111	2.03084	0.548557	3.70215	0.000213784	0.0006676	-	-
NC_002505_KPS-14	+	283320	18	38	17	4	8	10	17.0025	2.10613	0.694623	3.03205	0.00242903	0.00530856	-	-
NC_002505_KPS-14	+	283407	39	73	37	0	0	0	28.1325	8.42449	1.32447	6.36062	2.00937e-10	4.77632e-09	-	VC0278
NC_002505_KPS-14	+	283408	19	30	28	2	3	1	15.4095	4.007	0.84228	4.75733	1.96173e-06	1.35856e-05	-	VC0278
NC_002505_KPS-14	+	283501	21	17	15	1	1	0	10.148	5.0375	1.21778	4.13662	3.52463e-05	0.000148912	-	VC0278
NC_002505_KPS-14	+	283606	5	5	21	1	1	0	6.11973	4.25554	1.41189	3.01407	0.00257765	0.00558927	-	VC0278
NC_002505_KPS-14	+	283815	7	25	7	0	0	1	7.58826	5.54525	1.51067	3.67072	0.000241873	0.000740236	-	VC0278
NC_002505_KPS-14	+	284031	32	38	14	1	2	1	16.3032	4.72226	0.971196	4.86232	1.1602e-06	8.75258e-06	-	VC0278
NC_002505_KPS-14	+	284221	6	23	7	0	0	1	7.01966	5.43062	1.52263	3.56661	0.000361624	0.00103973	-	VC0278
NC_002505_KPS-14	+	284234	10	32	9	0	1	0	9.90058	5.93033	1.46707	4.0423	5.29296e-05	0.000208639	-	VC0278
NC_002505_KPS-14	+	284564	7	29	12	0	0	0	9.18951	6.80796	1.49628	4.54992	5.36654e-06	3.12273e-05	-	VC0278
NC_002505_KPS-14	+	284944	13	21	12	4	4	8	10.9508	1.89761	0.738559	2.56934	0.0101892	0.0185937	-	VC0278
NC_002505_KPS-14	+	284970	18	43	25	3	0	3	17.1698	4.21708	0.90155	4.67759	2.90268e-06	1.87821e-05	-	-
NC_002505_KPS-14	+	284976	7	33	6	0	0	0	8.85228	6.75409	1.5688	4.30526	1.6679e-05	8.00758e-05	-	-
NC_002505_KPS-14	+	291257	2	30	3	0	0	0	6.82652	6.37872	1.76423	3.61559	0.000299663	0.000887258	-	-
NC_002505_KPS-14	+	292602	7	20	5	4	0	0	6.75024	3.28961	1.32626	2.48036	0.013125	0.0232462	-	-
NC_002505_KPS-14	+	292970	5	23	3	4	1	2	7.02899	2.50256	1.1446	2.1864	0.0287863	0.046373	-	-
NC_002505_KPS-14	+	293037	4	36	0	3	0	1	8.40737	3.68557	1.59699	2.30783	0.0210087	0.035164	-	-
NC_002505_KPS-14	+	293105	6	21	1	0	0	0	5.37375	6.03415	1.7661	3.41665	0.000633963	0.00167347	-	-
NC_002505_KPS-14	+	294237	15	41	24	3	2	4	16.5102	3.52513	0.803822	4.38546	1.1574e-05	5.92856e-05	-	-
NC_002505_KPS-14	+	294348	5	31	6	2	0	2	8.68516	3.7949	1.23209	3.08004	0.0020697	0.00462071	-	-
NC_002505_KPS-14	+	294349	3	23	1	0	1	0	5.40503	5.03601	1.76925	2.84641	0.00442153	0.00894047	-	-
NC_002505_KPS-14	+	296095	17	4	31	4	6	6	11.9295	2.02177	0.863948	2.34015	0.0192762	0.0325764	-	-
NC_002505_KPS-14	+	304904	242	41	217	21	39	28	104.13	2.79279	0.644914	4.33048	1.48783e-05	7.29561e-05	-	-
NC_002505_KPS-14	+	305020	14	11	21	0	0	0	8.54916	6.70785	1.4198	4.72452	2.30658e-06	1.55099e-05	-	-
NC_002505_KPS-14	+	305021	44	33	48	1	0	2	23.5948	5.73003	0.989651	5.78995	7.04085e-09	1.09886e-07	-	-
NC_002505_KPS-14	+	305023	19	11	27	0	0	0	10.5464	7.0115	1.40335	4.99625	5.84573e-07	4.9025e-06	-	-
NC_002505_KPS-14	+	305074	50	73	57	1	0	0	33.9646	7.72799	1.28435	6.01703	1.77651e-09	3.28449e-08	-	-
NC_002505_KPS-14	+	305075	13	36	18	0	0	0	12.7412	7.28026	1.41196	5.15615	2.52079e-07	2.39447e-06	-	-
NC_002505_KPS-14	+	305138	26	19	25	0	0	0	12.9682	7.30952	1.34542	5.43289	5.54484e-08	6.56337e-07	-	-
NC_002505_KPS-14	+	310140	50	37	35	10	5	17	27.1331	2.29283	0.563226	4.07088	4.68357e-05	0.000188709	-	VC0302
NC_002505_KPS-14	+	310719	41	16	45	2	2	11	20.7699	3.16253	0.781674	4.04585	5.21336e-05	0.000206062	-	VC0302
NC_002505_KPS-14	+	311046	21	26	19	1	6	0	13.4718	3.5174	0.948924	3.70672	0.000209958	0.000658139	-	VC0302
NC_002505_KPS-14	+	311579	61	27	74	10	8	8	33.7448	2.94543	0.598902	4.91804	8.74148e-07	6.89435e-06	-	VC0303
NC_002505_KPS-14	+	311757	24	10	32	2	0	2	12.7345	4.38079	1.02378	4.27904	1.87703e-05	8.83245e-05	-	VC0303
NC_002505_KPS-14	+	311835	18	24	22	4	4	3	13.6618	2.86856	0.724173	3.96115	7.45906e-05	0.000277247	-	VC0303
NC_002505_KPS-14	+	311930	16	1	21	2	0	1	7.37607	3.96172	1.36306	2.90649	0.00365512	0.00757377	-	VC0303
NC_002505_KPS-14	+	312161	85	19	101	3	2	6	39.0711	4.56397	0.793048	5.75497	8.66549e-09	1.31401e-07	-	VC0303
NC_002505_KPS-14	+	312241	27	4	39	1	0	1	13.0999	5.45458	1.34979	4.04106	5.32094e-05	0.0002096	-	VC0303
NC_002505_KPS-14	+	312320	21	4	24	4	1	6	10.5143	2.50291	0.939888	2.66299	0.00774497	0.0146216	-	VC0303
NC_002505_KPS-14	+	312414	16	3	22	0	0	0	7.50799	6.52253	1.55656	4.19036	2.78518e-05	0.000122511	-	VC0303
NC_002505_KPS-14	+	312419	18	3	26	0	0	1	8.73278	5.7578	1.52032	3.78724	0.000152333	0.000502992	-	VC0303
NC_002505_KPS-14	+	312420	19	7	27	2	3	0	10.5613	3.6707	1.03748	3.53809	0.000403035	0.00113997	-	VC0303
NC_002505_KPS-14	+	312465	27	2	22	1	1	0	9.54962	4.9304	1.40163	3.51763	0.000435427	0.00121597	-	VC0303
NC_002505_KPS-14	+	312474	35	1	37	0	2	5	14.1872	3.76343	1.21457	3.09857	0.00194459	0.00437688	-	VC0303
NC_002505_KPS-14	+	312529	43	10	49	4	9	5	21.3745	2.79398	0.76855	3.6354	0.000277551	0.00083086	-	VC0303
NC_002505_KPS-14	+	312570	21	6	24	1	2	2	10.0791	3.67181	0.995247	3.68935	0.000224831	0.000696556	-	VC0303
NC_002505_KPS-14	+	312571	38	10	35	5	2	6	17.0458	3.00192	0.782019	3.83868	0.000123696	0.000422153	-	VC0303
NC_002505_KPS-14	+	312581	95	28	84	5	5	8	40.4531	3.84857	0.650922	5.91248	3.3699e-09	5.75608e-08	-	VC0303
NC_002505_KPS-14	+	312593	67	17	70	3	0	2	28.9008	5.25843	0.942409	5.57978	2.4083e-08	3.19047e-07	-	VC0303
NC_002505_KPS-14	+	312662	20	3	29	4	7	3	11.6625	2.16894	0.929488	2.33348	0.0196229	0.0330858	-	VC0303
NC_002505_KPS-14	+	312715	16	4	28	2	3	4	10.1373	2.75065	0.943133	2.9165	0.00353978	0.00736462	-	VC0303
NC_002505_KPS-14	+	312794	13	7	26	5	1	0	9.4952	3.19207	1.09649	2.91117	0.00360079	0.00747368	-	VC0303
NC_002505_KPS-14	+	313218	103	4	107	4	3	2	40.1955	4.83568	1.01168	4.77987	1.75409e-06	1.23844e-05	-	VC0303
NC_002505_KPS-14	+	313278	49	23	38	3	0	1	20.8166	5.08793	0.938432	5.42173	5.90237e-08	6.91747e-07	-	VC0303
NC_002505_KPS-14	+	313279	26	46	26	2	1	4	19.4662	4.18513	0.807896	5.18028	2.2155e-07	2.14142e-06	-	VC0303
NC_002505_KPS-14	+	313331	69	19	65	4	5	11	30.7973	3.28597	0.689357	4.76672	1.87251e-06	1.30734e-05	-	VC0303
NC_002505_KPS-14	+	313395	39	5	54	0	1	1	18.2005	5.94034	1.33553	4.44793	8.67028e-06	4.6567e-05	-	VC0303
NC_002505_KPS-14	+	313472	32	10	42	0	0	1	15.555	6.59932	1.39522	4.72996	2.24564e-06	1.51796e-05	-	VC0303
NC_002505_KPS-14	+	313473	50	43	47	7	1	3	27.683	3.98571	0.690265	5.77417	7.73311e-09	1.19066e-07	-	VC0303
NC_002505_KPS-14	+	313484	11	14	22	3	1	2	9.7032	3.30652	0.915917	3.61006	0.00030612	0.000903229	-	VC0303
NC_002505_KPS-14	+	313599	33	19	35	4	7	5	18.4598	2.75835	0.655474	4.20818	2.57436e-05	0.000114829	-	VC0303
NC_002505_KPS-14	+	313643	7	3	20	0	0	1	5.69	5.12693	1.5829	3.23895	0.00119969	0.00288331	-	VC0303
NC_002505_KPS-14	+	313793	17	8	28	0	0	0	9.79399	6.90486	1.44407	4.78154	1.73954e-06	1.23021e-05	-	VC0303
NC_002505_KPS-14	+	313859	20	1	17	0	0	0	6.87245	6.3959	1.66991	3.83009	0.000128097	0.000434672	-	VC0303
NC_002505_KPS-14	+	313885	25	4	33	4	1	3	12.5232	3.26424	0.979287	3.33328	0.000858293	0.00216782	-	VC0303
NC_002505_KPS-14	+	313999	70	8	49	0	0	0	22.9705	8.13553	1.44682	5.62303	1.87632e-08	2.57355e-07	-	VC0303
NC_002505_KPS-14	+	314000	58	15	61	5	5	1	26.2467	3.86284	0.817522	4.72506	2.30045e-06	1.54716e-05	-	VC0303
NC_002505_KPS-14	+	314103	55	4	43	8	6	0	20.698	3.05894	1.07373	2.84888	0.00438738	0.00887984	-	VC0303
NC_002505_KPS-14	+	314133	17	8	30	3	4	5	11.9232	2.53254	0.810905	3.1231	0.00178955	0.00407072	-	VC0303
NC_002505_KPS-14	+	314144	57	13	52	18	13	16	29.2607	1.67327	0.642235	2.60539	0.00917705	0.0169637	-	VC0303
NC_002505_KPS-14	+	314145	119	33	95	23	26	36	57.4781	1.86082	0.541558	3.43604	0.000590281	0.00157563	-	VC0303
NC_002505_KPS-14	+	314278	34	34	27	5	10	7	20.9832	2.43675	0.595992	4.08856	4.34068e-05	0.000177213	-	VC0303
NC_002505_KPS-14	+	314397	31	14	32	1	3	9	15.9397	2.95295	0.791771	3.72955	0.000191821	0.000610606	-	VC0303
NC_002505_KPS-14	+	314417	25	15	19	10	6	5	14.0881	1.78306	0.672526	2.65129	0.00801853	0.0150709	-	VC0303
NC_002505_KPS-14	+	314571	25	6	16	1	1	3	9.24088	3.57176	1.0153	3.51794	0.000434905	0.00121476	-	VC0303
NC_002505_KPS-14	+	317455	26	27	15	0	2	3	13.3656	4.13111	0.925776	4.46232	8.10767e-06	4.4003e-05	-	-
NC_002505_KPS-14	+	317950	309	270	392	80	51	98	214.079	2.43225	0.375695	6.47401	9.54375e-11	2.48177e-09	-	VC0306
NC_002505_KPS-14	+	317982	45	24	49	15	6	16	27.1707	2.00885	0.585065	3.43355	0.000595739	0.00158789	-	VC0306
NC_002505_KPS-14	+	317987	16	11	26	7	2	4	11.7935	2.34296	0.796766	2.94059	0.00327592	0.00688922	-	VC0306
NC_002505_KPS-14	+	317988	22	15	39	4	5	11	16.9394	2.29747	0.699325	3.28526	0.00101888	0.00250756	-	VC0306
NC_002505_KPS-14	+	317997	104	74	95	1	0	0	50.7026	8.30997	1.25949	6.59786	4.17123e-11	1.18429e-09	-	VC0306
NC_002505_KPS-14	+	318016	25	14	23	3	2	0	12.2389	3.90919	0.937709	4.16888	3.06105e-05	0.000132528	-	VC0306
NC_002505_KPS-14	+	318040	67	57	92	3	5	4	41.9658	4.5008	0.617646	7.28703	3.1687e-13	1.43861e-11	-	VC0306
NC_002505_KPS-14	+	318078	10	21	7	0	0	3	7.57371	4.10387	1.26434	3.24586	0.00117098	0.00282395	-	VC0306
NC_002505_KPS-14	+	318484	97	30	87	15	27	29	49.5341	1.91371	0.55989	3.41801	0.000630799	0.00166648	VC0307	rho
NC_002505_KPS-14	+	318665	10	23	25	3	3	2	12.1859	3.1935	0.848199	3.76504	0.000166523	0.000541907	VC0307	rho
NC_002505_KPS-14	+	318686	36	20	44	8	8	16	23.0595	1.99889	0.588957	3.39395	0.000688918	0.00179797	VC0307	rho
NC_002505_KPS-14	+	318798	26	10	19	1	0	3	10.607	4.14012	1.03703	3.99228	6.54405e-05	0.000248606	VC0307	rho
NC_002505_KPS-14	+	318864	33	9	19	2	0	1	11.5406	4.64653	1.12416	4.13335	3.57515e-05	0.000150758	VC0307	rho
NC_002505_KPS-14	+	318866	34	7	11	4	5	6	11.5707	2.09428	0.830903	2.52048	0.0117194	0.0210196	VC0307	rho
NC_002505_KPS-14	+	318937	37	10	28	5	1	4	15.147	3.21827	0.834933	3.85452	0.000115956	0.000399911	VC0307	rho
NC_002505_KPS-14	+	319060	57	30	56	0	3	4	27.3382	4.70152	0.785041	5.98889	2.11284e-09	3.8212e-08	VC0307	rho
NC_002505_KPS-14	+	319089	97	36	86	7	17	17	46.1265	2.74333	0.573902	4.78013	1.7518e-06	1.23723e-05	VC0307	rho
NC_002505_KPS-14	+	319095	13	15	23	9	3	6	12.2319	1.83177	0.735594	2.49019	0.0127675	0.022686	VC0307	rho
NC_002505_KPS-14	+	319212	27	16	13	4	5	2	11.998	2.63444	0.783125	3.36401	0.000768194	0.0019732	VC0307	rho
NC_002505_KPS-14	+	319267	58	45	54	9	11	12	33.8377	2.62574	0.490698	5.35103	8.74549e-08	9.68583e-07	VC0307	rho
NC_002505_KPS-14	+	319497	99	57	89	9	6	11	48.9919	3.56828	0.514423	6.93647	4.02005e-12	1.45483e-10	VC0307	rho
NC_002505_KPS-14	+	319565	34	36	32	6	11	4	22.2607	2.58166	0.626979	4.11763	3.82796e-05	0.00015962	-	-
NC_002505_KPS-14	+	319598	90	67	82	2	3	2	45.336	5.41767	0.693284	7.8145	5.51815e-15	3.48655e-13	-	-
NC_002505_KPS-14	+	319599	31	20	29	1	1	4	15.6119	4.09822	0.837454	4.89367	9.89723e-07	7.651e-06	-	-
NC_002505_KPS-14	+	319635	11	32	16	1	9	6	13.5825	2.24993	0.855246	2.63075	0.00851979	0.0158943	-	-
NC_002505_KPS-14	+	320172	7	25	17	0	0	3	9.71609	4.47479	1.22941	3.63978	0.000272875	0.000819065	-	VC0308
NC_002505_KPS-14	+	320350	5	26	11	1	0	2	8.47537	4.21973	1.23941	3.40462	0.000662557	0.00173888	-	VC0308
NC_002505_KPS-14	+	320750	11	28	11	4	1	1	10.4359	3.38422	0.985142	3.43527	0.000591973	0.00157933	-	VC0309
NC_002505_KPS-14	+	320895	33	38	24	6	9	24	23.1735	1.68733	0.618234	2.72927	0.00634746	0.0122758	-	VC0309
NC_002505_KPS-14	+	320896	33	52	52	12	8	10	30.2421	2.52924	0.552959	4.57401	4.78474e-06	2.83727e-05	-	VC0309
NC_002505_KPS-14	+	320913	13	25	14	5	5	11	12.8137	1.69446	0.709669	2.38768	0.0169551	0.029111	-	VC0309
NC_002505_KPS-14	+	320936	24	9	8	2	1	6	8.69613	2.55233	0.939239	2.71745	0.00657875	0.0126731	-	VC0309
NC_002505_KPS-14	+	321056	10	29	8	1	0	1	9.24956	4.93242	1.33141	3.70467	0.000211665	0.00066246	-	VC0309
NC_002505_KPS-14	+	321057	6	21	5	2	1	3	6.98549	2.807	1.07583	2.60916	0.00907655	0.0168007	-	VC0309
NC_002505_KPS-14	+	321561	66	72	77	13	8	10	44.7895	3.12225	0.494251	6.31714	2.66454e-10	6.16529e-09	-	VC0309
NC_002505_KPS-14	+	321597	10	31	13	4	5	3	12.1187	2.50976	0.831709	3.01759	0.00254792	0.00553292	-	VC0309
NC_002505_KPS-14	+	321665	12	26	19	6	0	11	13.1384	2.16858	0.906252	2.39291	0.0167152	0.0287462	-	VC0309
NC_002505_KPS-14	+	321777	21	46	35	12	15	16	25.65	1.60084	0.569348	2.81172	0.00492781	0.00983621	-	VC0309
NC_002505_KPS-14	+	322002	38	24	33	4	5	4	19.4965	3.18594	0.65168	4.88882	1.01442e-06	7.81504e-06	-	VC0309
NC_002505_KPS-14	+	322003	25	24	26	4	7	11	17.1168	2.1317	0.615908	3.46108	0.000538021	0.00145562	-	VC0309
NC_002505_KPS-14	+	322118	17	25	17	1	2	10	12.8201	2.61491	0.837559	3.12207	0.00179587	0.004082	-	VC0309
NC_002505_KPS-14	+	322463	9	20	9	1	3	1	7.96763	3.25965	1.02511	3.17981	0.00147373	0.00343753	-	VC0309
NC_002505_KPS-14	+	322594	8	23	7	0	0	0	7.24251	6.46452	1.52406	4.24163	2.21899e-05	0.000101491	-	VC0311
NC_002505_KPS-14	+	322605	35	43	33	7	7	18	25.2854	2.17901	0.569265	3.82776	0.000129316	0.000438312	-	VC0311
NC_002505_KPS-14	+	322757	38	99	32	9	2	7	34.8053	3.59597	0.742704	4.84172	1.2872e-06	9.54319e-06	-	VC0311
NC_002505_KPS-14	+	322810	15	20	10	2	4	5	10.0255	2.39167	0.801359	2.98452	0.00284021	0.00608027	-	VC0311
NC_002505_KPS-14	+	322811	73	63	60	27	23	31	48.3506	1.6082	0.408905	3.93294	8.39145e-05	0.000305681	-	VC0311
NC_002505_KPS-14	+	322954	25	43	22	10	7	13	21.3369	1.94821	0.60665	3.21142	0.00132082	0.00313176	VC0312	fre
NC_002505_KPS-14	+	323915	18	38	10	7	3	7	14.9999	2.32125	0.787777	2.94658	0.00321312	0.00677617	-	-
NC_002505_KPS-14	+	323916	656	1835	472	140	100	214	630.264	3.10541	0.578116	5.3716	7.80423e-08	8.77027e-07	-	-
NC_002505_KPS-14	+	323917	21	104	22	4	1	6	29.8558	4.15715	0.902026	4.60868	4.05227e-06	2.47936e-05	-	-
NC_002505_KPS-14	+	324097	8	22	12	3	2	5	9.418	2.45464	0.866222	2.83374	0.00460073	0.00925781	-	-
NC_002505_KPS-14	+	325640	56	123	69	1	2	10	48.6965	4.68936	0.741811	6.32151	2.59026e-10	6.00629e-09	VCr007	16Sc
NC_002505_KPS-14	+	329866	5	21	9	3	5	3	8.36295	2.01799	0.92614	2.17892	0.0293374	0.0471665	-	-
NC_002505_KPS-14	+	330437	14	86	10	2	8	5	23.5032	3.25441	0.963647	3.37718	0.000732318	0.00189472	-	-
NC_002505_KPS-14	+	330870	7	24	9	0	5	0	8.43937	3.29977	1.25573	2.62776	0.00859484	0.0160187	-	-
NC_002505_KPS-14	+	330899	1	32	0	0	1	0	6.64338	5.34348	2.01091	2.65724	0.00787834	0.0148417	-	-
NC_002505_KPS-14	+	331080	3	33	6	1	0	0	8.31743	5.67323	1.61682	3.50888	0.000449994	0.00125005	-	-
NC_002505_KPS-14	+	331612	20	12	10	4	6	3	9.71194	1.98579	0.786706	2.52418	0.0115968	0.0208283	VC0318	murB
NC_002505_KPS-14	+	331909	33	17	36	8	12	4	19.5749	2.11662	0.67788	3.12241	0.00179375	0.00407847	VC0318	murB
NC_002505_KPS-14	+	331910	38	36	26	13	12	12	24.1323	1.75657	0.529504	3.31738	0.000908663	0.00227592	VC0318	murB
NC_002505_KPS-14	+	331915	70	51	61	6	10	8	37.2764	3.2454	0.521925	6.21814	5.03069e-10	1.07996e-08	VC0318	murB
NC_002505_KPS-14	+	331916	20	10	17	4	7	6	11.1679	1.78549	0.71634	2.49252	0.0126841	0.0225513	VC0318	murB
NC_002505_KPS-14	+	332031	24	18	20	2	0	1	11.9344	4.69576	1.05076	4.46891	7.8619e-06	4.29049e-05	VC0318	murB
NC_002505_KPS-14	+	332145	7	25	12	1	0	8	9.56839	2.77888	1.09789	2.53111	0.0113701	0.0204739	VC0318	murB
NC_002505_KPS-14	+	332272	38	106	24	7	7	14	36.0382	2.98473	0.713321	4.18428	2.86075e-05	0.000125258	VC0318	murB
NC_002505_KPS-14	+	332286	62	157	40	1	2	0	49.7473	6.76661	1.06656	6.34431	2.23424e-10	5.25644e-09	VC0318	murB
NC_002505_KPS-14	+	332379	18	61	19	2	0	1	19.1794	5.39587	1.1244	4.79888	1.59552e-06	1.14407e-05	VC0318	murB
NC_002505_KPS-14	+	332380	15	38	15	2	3	1	13.8503	3.83528	0.921794	4.16067	3.17314e-05	0.000136499	VC0318	murB
NC_002505_KPS-14	+	332459	34	97	21	6	0	5	30.5924	4.17115	0.906956	4.59906	4.24396e-06	2.57257e-05	VC0318	murB
NC_002505_KPS-14	+	332568	11	29	13	3	2	3	11.2573	3.08907	0.872191	3.54173	0.000397511	0.00112683	VC0318	murB
NC_002505_KPS-14	+	332622	13	20	15	1	2	1	9.63084	3.92125	0.992913	3.94924	7.84001e-05	0.000289077	VC0318	murB
NC_002505_KPS-14	+	332704	13	21	14	3	0	4	10.0223	3.15718	0.922584	3.4221	0.000621385	0.00164463	-	VC0319
NC_002505_KPS-14	+	332713	18	16	22	3	7	7	12.9041	2.0636	0.68701	3.00374	0.00266679	0.00575411	-	VC0319
NC_002505_KPS-14	+	332714	7	24	6	2	1	2	7.81323	3.26061	1.08202	3.01345	0.00258299	0.00559901	-	VC0319
NC_002505_KPS-14	+	332792	112	175	86	7	3	2	72.0255	5.27447	0.667022	7.90749	2.62628e-15	1.77137e-13	-	VC0319
NC_002505_KPS-14	+	332904	8	22	19	1	2	0	9.7788	4.35117	1.14385	3.80396	0.000142399	0.000475341	-	VC0319
NC_002505_KPS-14	+	332947	60	29	79	0	1	1	31.2833	6.72532	1.17553	5.7211	1.05837e-08	1.56097e-07	-	VC0319
NC_002505_KPS-14	+	332948	29	9	22	1	1	1	11.404	4.6313	1.09135	4.24366	2.19907e-05	0.00010075	-	VC0319
NC_002505_KPS-14	+	332949	46	14	28	3	6	1	17.6012	3.3954	0.8275	4.10321	4.07466e-05	0.000168103	-	VC0319
NC_002505_KPS-14	+	333042	96	69	91	9	7	11	51.3701	3.57968	0.485052	7.37999	1.58299e-13	7.58576e-12	-	VC0319
NC_002505_KPS-14	+	333066	20	4	11	4	3	0	7.46604	2.54326	1.09704	2.3183	0.0204331	0.0343011	-	VC0319
NC_002505_KPS-14	+	333068	18	9	21	8	4	4	11.2911	1.8803	0.761991	2.46761	0.0136017	0.023993	-	VC0319
NC_002505_KPS-14	+	333121	66	52	55	3	3	9	34.1716	3.89314	0.5996	6.49289	8.4204e-11	2.22123e-09	-	VC0319
NC_002505_KPS-14	+	333213	24	30	22	3	7	1	15.956	3.0811	0.783195	3.93401	8.35419e-05	0.000304509	-	VC0319
NC_002505_KPS-14	+	333344	22	37	36	5	7	5	20.4418	2.8176	0.645584	4.36441	1.27464e-05	6.4203e-05	-	VC0319
NC_002505_KPS-14	+	333437	42	27	39	5	2	6	21.8453	3.39417	0.655408	5.1787	2.23432e-07	2.15711e-06	-	VC0319
NC_002505_KPS-14	+	333471	56	19	30	4	3	2	20.5137	3.82901	0.771646	4.96213	6.97237e-07	5.68005e-06	-	VC0319
NC_002505_KPS-14	+	333480	25	11	25	6	0	5	12.8182	2.8041	0.879556	3.18809	0.00143215	0.00335367	-	VC0319
NC_002505_KPS-14	+	333548	11	17	22	3	0	3	10.2606	3.42369	0.947122	3.61483	0.000300541	0.000889443	-	VC0319
NC_002505_KPS-14	+	333644	50	62	52	3	1	3	31.7186	4.89877	0.726331	6.74454	1.53516e-11	4.83283e-10	-	-
NC_002505_KPS-14	+	333690	7	35	7	1	2	3	10.2929	3.43336	1.06546	3.22242	0.00127111	0.00303061	-	-
NC_002505_KPS-14	+	333783	37	62	40	7	1	1	27.5989	4.2532	0.802859	5.29756	1.1736e-07	1.24607e-06	-	-
NC_002505_KPS-14	+	333784	9	30	11	3	3	3	10.8903	2.83351	0.889863	3.18421	0.00145152	0.00339298	-	-
NC_002505_KPS-14	+	333800	12	29	4	4	2	1	9.65354	2.9995	1.05166	2.85216	0.00434235	0.00880073	-	-
NC_002505_KPS-14	+	333808	11	29	7	2	0	0	9.2727	4.87979	1.36454	3.57615	0.000348688	0.00100886	-	-
NC_002505_KPS-14	+	333925	13	36	20	2	1	2	13.8519	4.15234	0.941556	4.41009	1.03328e-05	5.3866e-05	-	-
NC_002505_KPS-14	+	333936	9	33	5	2	2	2	9.90835	3.33616	1.05668	3.15722	0.00159281	0.00367847	-	-
NC_002505_KPS-14	+	333982	13	46	7	3	5	4	14.4366	2.82453	0.914002	3.09029	0.00199963	0.00448562	-	-
NC_002505_KPS-14	+	334074	13	27	9	2	0	1	9.72786	4.38142	1.15663	3.78811	0.000151799	0.000501459	-	-
NC_002505_KPS-14	+	334080	11	24	8	2	0	3	8.85152	3.49636	1.05659	3.3091	0.000935973	0.00233365	-	-
NC_002505_KPS-14	+	334160	11	22	10	1	2	1	8.73841	3.76786	1.04136	3.61819	0.000296665	0.000879514	-	-
NC_002505_KPS-14	+	334446	10	61	6	3	1	5	16.1705	3.52435	1.0575	3.33271	0.000860048	0.00217139	-	-
NC_002505_KPS-14	+	334711	16	20	32	3	2	6	14.2964	3.00065	0.76112	3.94242	8.06645e-05	0.000296071	-	-
NC_002505_KPS-14	+	334758	31	75	27	0	3	10	26.9922	3.80943	0.871684	4.37019	1.24136e-05	6.28496e-05	-	-
NC_002505_KPS-14	+	334759	15	37	9	2	3	6	13.1556	2.86979	0.870199	3.29786	0.00097426	0.00241339	-	-
NC_002505_KPS-14	+	334804	44	96	41	6	4	12	37.4095	3.43648	0.649867	5.28797	1.2368e-07	1.30268e-06	-	-
NC_002505_KPS-14	+	334817	14	33	7	0	3	4	11.2416	3.35049	1.02559	3.26688	0.0010874	0.00265231	-	-
NC_002505_KPS-14	+	335016	1009	1630	937	352	133	435	806.046	2.33869	0.493942	4.73476	2.19319e-06	1.4896e-05	-	-
NC_002505_KPS-14	+	335033	54	56	27	3	9	16	29.453	2.67587	0.645053	4.1483	3.34957e-05	0.000142842	-	-
NC_002505_KPS-14	+	335034	93	155	98	12	5	21	70.5412	3.57969	0.554541	6.45523	1.08051e-10	2.76579e-09	-	-
NC_002505_KPS-14	+	335035	13	79	10	3	4	7	21.7234	3.28332	0.936961	3.50423	0.000457936	0.00126878	-	-
NC_002505_KPS-14	+	335040	100	255	157	15	6	10	101.813	4.39328	0.591337	7.4294	1.0909e-13	5.39535e-12	-	-
NC_002505_KPS-14	+	335041	36	81	56	10	20	12	39.0771	2.3784	0.584623	4.06826	4.73657e-05	0.000190517	-	-
NC_002505_KPS-14	+	335128	16	41	8	0	0	0	12.3733	7.23847	1.4767	4.90179	9.49666e-07	7.38631e-06	-	-
NC_002505_KPS-14	+	335265	45	74	27	16	17	16	34.8201	1.9122	0.572205	3.3418	0.000832356	0.00211195	-	-
NC_002505_KPS-14	+	335266	92	198	72	59	29	47	88.6905	1.77059	0.557265	3.17728	0.00148663	0.00346387	-	-
NC_002505_KPS-14	+	336344	61	29	58	9	26	22	35.6091	1.70156	0.566736	3.00238	0.00267875	0.00577611	VC0321	tuf
NC_002505_KPS-14	+	336472	26	23	22	8	5	16	17.3009	1.66495	0.612725	2.71729	0.00658194	0.0126781	VC0321	tuf
NC_002505_KPS-14	+	336594	30	22	19	5	10	6	16.2932	2.0677	0.643934	3.21104	0.00132255	0.00313469	-	-
NC_002505_KPS-14	+	336595	99	65	66	10	32	6	49.9401	2.51701	0.666293	3.77762	0.000158332	0.000519464	-	-
NC_002505_KPS-14	+	336596	40	24	25	1	14	4	19.2949	2.51338	0.814164	3.08707	0.00202139	0.00452737	-	-
NC_002505_KPS-14	+	336606	91	446	82	43	26	46	136.09	2.81661	0.705729	3.99106	6.57778e-05	0.000249632	-	-
NC_002505_KPS-14	+	336669	15	16	29	4	3	3	12.7155	2.91251	0.776636	3.75016	0.000176721	0.000569458	-	-
NC_002505_KPS-14	+	336673	57	73	73	27	22	18	48.1801	1.91365	0.470539	4.06694	4.7634e-05	0.000191416	-	-
NC_002505_KPS-14	+	336715	9	28	11	7	6	4	11.7497	1.82881	0.809596	2.25891	0.0238888	0.03938	-	-
NC_002505_KPS-14	+	336842	42	20	39	3	1	1	19.3527	4.63898	0.872918	5.31433	1.07048e-07	1.15155e-06	VC0322	secE
NC_002505_KPS-14	+	336843	98	67	89	2	0	1	47.4388	6.73069	0.947888	7.10072	1.24105e-12	5.00486e-11	VC0322	secE
NC_002505_KPS-14	+	336881	167	158	142	7	4	8	89.6802	4.96116	0.500851	9.90547	3.94096e-23	9.64391e-21	VC0322	secE
NC_002505_KPS-14	+	336946	23	37	30	5	1	9	19.0345	2.97769	0.724519	4.10988	3.95861e-05	0.000164075	VC0322	secE
NC_002505_KPS-14	+	337040	475	365	382	96	52	86	261.108	2.70797	0.374877	7.22363	5.06184e-13	2.21337e-11	VC0322	secE
NC_002505_KPS-14	+	337180	119	289	106	23	9	24	105.794	3.57361	0.597934	5.9766	2.27846e-09	4.08514e-08	VC0323	nusG
NC_002505_KPS-14	+	337321	36	58	39	19	8	9	30.5182	2.20051	0.600132	3.6667	0.000245699	0.000749605	VC0323	nusG
NC_002505_KPS-14	+	337510	71	35	63	10	2	12	34.5449	3.16139	0.633206	4.99268	5.95468e-07	4.97955e-06	VC0323	nusG
NC_002505_KPS-14	+	337685	153	245	108	37	15	45	109.287	2.75706	0.533022	5.17251	2.30974e-07	2.2192e-06	-	-
NC_002505_KPS-14	+	337732	43	141	35	23	14	27	51.2216	2.1581	0.663353	3.25332	0.00114066	0.00276205	-	-
NC_002505_KPS-14	+	337733	25	146	20	13	6	12	41.4711	3.01057	0.83841	3.59081	0.00032965	0.000962342	-	-
NC_002505_KPS-14	+	337744	191	347	155	54	46	71	155.816	2.38409	0.461115	5.17027	2.33751e-07	2.24189e-06	-	-
NC_002505_KPS-14	+	337750	6	24	19	5	4	7	11.6726	1.99326	0.808545	2.46524	0.0136922	0.0241332	-	-
NC_002505_KPS-14	+	337822	21	24	16	6	5	1	13.2914	2.62797	0.791256	3.32127	0.00089609	0.00224933	VC0324	rplK
NC_002505_KPS-14	+	337828	29	45	35	9	8	26	26.4989	1.7498	0.594455	2.94353	0.00324489	0.00683368	VC0324	rplK
NC_002505_KPS-14	+	337829	16	26	9	5	3	8	11.8989	2.04817	0.775611	2.64072	0.00827311	0.0154886	VC0324	rplK
NC_002505_KPS-14	+	337846	83	52	42	4	13	0	35.323	3.61219	0.849788	4.2507	2.13105e-05	9.81127e-05	VC0324	rplK
NC_002505_KPS-14	+	337847	34	33	28	2	13	2	20.3379	2.76214	0.795251	3.4733	0.000514104	0.0014006	VC0324	rplK
NC_002505_KPS-14	+	338301	42	42	27	15	16	5	26.2836	1.89882	0.635005	2.99025	0.00278749	0.00598164	VC0325	rplA
NC_002505_KPS-14	+	338403	76	76	63	14	5	14	44.8794	3.04882	0.519233	5.87178	4.31129e-09	7.16448e-08	VC0325	rplA
NC_002505_KPS-14	+	338435	41	27	17	6	19	1	19.7921	1.94058	0.881069	2.20253	0.027628	0.0447187	VC0325	rplA
NC_002505_KPS-14	+	338472	26	40	18	6	3	11	18.63	2.45605	0.690654	3.55612	0.000376373	0.00107478	VC0325	rplA
NC_002505_KPS-14	+	338520	209	421	145	23	39	37	161.248	3.32717	0.534016	6.23048	4.65018e-10	1.0081e-08	VC0325	rplA
NC_002505_KPS-14	+	338525	317	335	179	9	39	12	164.079	4.08237	0.619133	6.59368	4.29051e-11	1.21495e-09	VC0325	rplA
NC_002505_KPS-14	+	338526	133	168	49	9	23	14	72.3889	3.25284	0.620213	5.24472	1.56524e-07	1.59475e-06	VC0325	rplA
NC_002505_KPS-14	+	338543	27	21	19	3	11	3	15.0316	2.26711	0.748033	3.03076	0.0024394	0.00532879	VC0325	rplA
NC_002505_KPS-14	+	338628	8	28	11	2	7	6	11.1755	2.02348	0.860498	2.35153	0.0186965	0.031706	VC0325	rplA
NC_002505_KPS-14	+	338629	77	100	32	8	46	13	49.4187	1.93412	0.745417	2.59468	0.00946787	0.0174261	VC0325	rplA
NC_002505_KPS-14	+	338630	110	94	47	0	38	4	53.0946	2.82992	1.04922	2.69717	0.00699308	0.0133667	VC0325	rplA
NC_002505_KPS-14	+	338947	195	100	246	42	39	55	119.813	2.32308	0.445763	5.21146	1.87365e-07	1.85742e-06	-	-
NC_002505_KPS-14	+	338975	23	14	12	2	7	3	10.8397	2.32956	0.80561	2.89167	0.00383197	0.0078946	-	-
NC_002505_KPS-14	+	338976	34	18	7	1	6	3	12.2851	2.86057	0.914524	3.12793	0.00176042	0.00401341	-	-
NC_002505_KPS-14	+	338987	62	56	75	9	9	14	40.5761	2.94012	0.487375	6.03255	1.61391e-09	3.01851e-08	-	-
NC_002505_KPS-14	+	339217	63	99	43	12	6	29	45.1163	2.5403	0.621949	4.08441	4.41883e-05	0.000179863	VC0326	rplJ
NC_002505_KPS-14	+	339218	12	28	19	5	8	4	13.7687	2.12269	0.74023	2.86761	0.00413587	0.00843455	VC0326	rplJ
NC_002505_KPS-14	+	339246	44	46	13	5	18	5	23.4912	2.16501	0.780383	2.77429	0.00553227	0.0108841	VC0326	rplJ
NC_002505_KPS-14	+	339247	301	252	176	21	84	34	156.262	2.68314	0.572899	4.68343	2.82108e-06	1.83399e-05	VC0326	rplJ
NC_002505_KPS-14	+	339248	112	69	43	4	23	11	46.8958	2.85839	0.668749	4.27424	1.91788e-05	8.99878e-05	VC0326	rplJ
NC_002505_KPS-14	+	339254	34	39	14	10	5	12	20.1702	2.04187	0.664739	3.07169	0.00212849	0.00473326	VC0326	rplJ
NC_002505_KPS-14	+	339265	67	45	37	6	20	5	32.2873	2.5369	0.670186	3.78537	0.000153477	0.000506229	VC0326	rplJ
NC_002505_KPS-14	+	339266	81	24	35	2	27	1	30.1778	2.42863	1.01236	2.39897	0.0164411	0.0283312	VC0326	rplJ
NC_002505_KPS-14	+	339272	66	79	32	17	38	9	43.0405	1.74118	0.674561	2.58121	0.00984558	0.0180397	VC0326	rplJ
NC_002505_KPS-14	+	339273	24	20	9	1	12	2	12.1448	2.09373	0.954588	2.19333	0.0282836	0.0456492	VC0326	rplJ
NC_002505_KPS-14	+	339274	20	31	6	0	7	2	12.0928	2.98289	1.05679	2.82258	0.00476389	0.00955035	VC0326	rplJ
NC_002505_KPS-14	+	339276	33	29	21	1	10	4	17.6713	2.78079	0.76844	3.61874	0.000296035	0.000877985	VC0326	rplJ
NC_002505_KPS-14	+	339277	71	81	28	6	27	8	39.8887	2.4262	0.722085	3.35999	0.000779449	0.00199796	VC0326	rplJ
NC_002505_KPS-14	+	339280	33	31	35	8	2	6	20.8017	2.96313	0.65016	4.55755	5.1754e-06	3.02931e-05	VC0326	rplJ
NC_002505_KPS-14	+	339352	19	24	9	1	10	4	11.994	2.11382	0.880777	2.39994	0.0163976	0.0282604	VC0326	rplJ
NC_002505_KPS-14	+	339354	75	60	46	8	42	6	42.2919	1.94596	0.758459	2.56568	0.0102975	0.0187651	VC0326	rplJ
NC_002505_KPS-14	+	339355	43	36	16	6	21	4	22.4239	1.88016	0.776614	2.42098	0.0154789	0.0268636	VC0326	rplJ
NC_002505_KPS-14	+	339358	16	20	6	2	5	1	9.10617	2.68798	0.959415	2.80169	0.0050836	0.010107	VC0326	rplJ
NC_002505_KPS-14	+	339359	68	38	28	5	23	9	30.2122	2.14085	0.687285	3.11493	0.00183986	0.00416977	VC0326	rplJ
NC_002505_KPS-14	+	339360	56	26	25	0	20	4	23.2736	2.41508	0.98474	2.4525	0.0141865	0.0248946	VC0326	rplJ
NC_002505_KPS-14	+	339376	35	47	19	3	12	4	21.8375	2.71977	0.742557	3.66271	0.00024956	0.000759734	VC0326	rplJ
NC_002505_KPS-14	+	339377	37	10	14	4	2	0	12.0147	3.57901	1.00977	3.54439	0.000393519	0.00111697	VC0326	rplJ
NC_002505_KPS-14	+	339436	24	53	18	7	15	8	22.5466	1.99552	0.696458	2.86524	0.00416688	0.00848865	VC0326	rplJ
NC_002505_KPS-14	+	339437	30	46	11	3	13	7	19.8045	2.25294	0.786334	2.86512	0.00416855	0.00849139	VC0326	rplJ
NC_002505_KPS-14	+	339438	30	25	16	4	11	6	16.3193	2.0697	0.679365	3.04652	0.00231506	0.00509232	VC0326	rplJ
NC_002505_KPS-14	+	339439	40	47	29	10	25	12	28.8025	1.61386	0.589088	2.73959	0.00615151	0.0119439	VC0326	rplJ
NC_002505_KPS-14	+	340051	327	437	283	114	99	173	252.296	1.80627	0.372366	4.8508	1.22964e-06	9.17891e-06	VC0327	rplL
NC_002505_KPS-14	+	340063	188	252	196	64	39	65	144.006	2.26648	0.396213	5.72036	1.06298e-08	1.56585e-07	VC0327	rplL
NC_002505_KPS-14	+	340064	1901	2638	1869	137	138	145	1264.6	4.26696	0.348184	12.2549	1.58178e-34	1.62572e-31	VC0327	rplL
NC_002505_KPS-14	+	340118	37	31	23	4	8	27	22.1956	1.64171	0.686224	2.39239	0.0167392	0.0287793	VC0327	rplL
NC_002505_KPS-14	+	340133	10	21	10	5	4	1	9.33523	2.33463	0.902203	2.5877	0.00966189	0.0177423	VC0327	rplL
NC_002505_KPS-14	+	340138	22	7	15	0	1	1	8.31408	4.78308	1.29208	3.70184	0.000214043	0.000668267	-	-
NC_002505_KPS-14	+	340144	294	266	314	2	0	8	163.931	6.83464	0.646322	10.5747	3.90531e-26	1.45327e-23	-	-
NC_002505_KPS-14	+	340145	162	177	158	6	1	3	94.2878	5.96653	0.621661	9.59772	8.17341e-22	1.63256e-19	-	-
NC_002505_KPS-14	+	340146	68	47	41	5	6	4	31.0824	3.68798	0.603079	6.11524	9.64088e-10	1.92171e-08	-	-
NC_002505_KPS-14	+	340157	26	19	17	0	0	0	11.467	7.13231	1.36342	5.23119	1.68421e-07	1.69817e-06	-	-
NC_002505_KPS-14	+	340161	157	109	151	4	6	5	79.4211	5.12138	0.54106	9.46546	2.92283e-21	5.31016e-19	-	-
NC_002505_KPS-14	+	340276	18	43	16	4	1	2	15.6772	3.80482	0.889033	4.27973	1.87123e-05	8.80936e-05	-	-
NC_002505_KPS-14	+	340378	23	28	21	3	0	2	14.2073	4.19184	0.901762	4.6485	3.34351e-06	2.1103e-05	VC0328	rpoB
NC_002505_KPS-14	+	340438	26	12	6	1	1	0	8.34464	4.73684	1.3195	3.58988	0.00033083	0.00096521	VC0328	rpoB
NC_002505_KPS-14	+	340488	24	8	9	0	0	0	7.44847	6.51282	1.48389	4.38902	1.13862e-05	5.85043e-05	VC0328	rpoB
NC_002505_KPS-14	+	340730	54	31	57	10	2	8	29.1652	3.15517	0.643689	4.9017	9.50098e-07	7.38914e-06	VC0328	rpoB
NC_002505_KPS-14	+	340882	31	43	37	15	8	15	26.4193	1.89422	0.540257	3.50615	0.000454643	0.00126121	VC0328	rpoB
NC_002505_KPS-14	+	340899	18	20	18	8	3	7	13.1142	1.97751	0.685136	2.8863	0.00389795	0.00801065	VC0328	rpoB
NC_002505_KPS-14	+	340957	41	22	38	0	6	4	20.0742	3.66673	0.789228	4.64597	3.38481e-06	2.13227e-05	VC0328	rpoB
NC_002505_KPS-14	+	340965	33	36	28	0	1	7	19.1423	4.02061	0.850426	4.72775	2.27017e-06	1.53109e-05	VC0328	rpoB
NC_002505_KPS-14	+	340996	7	26	12	2	0	0	8.9224	4.82266	1.35386	3.56215	0.000367826	0.00105476	VC0328	rpoB
NC_002505_KPS-14	+	341098	14	21	11	1	3	3	9.66274	3.07312	0.884224	3.4755	0.0005099	0.0013905	VC0328	rpoB
NC_002505_KPS-14	+	341099	23	11	6	3	1	4	8.45177	2.65574	0.943137	2.81585	0.00486478	0.00972569	VC0328	rpoB
NC_002505_KPS-14	+	341155	54	56	43	3	1	11	30.5492	3.75534	0.688379	5.45534	4.88782e-08	5.88639e-07	VC0328	rpoB
NC_002505_KPS-14	+	341381	29	22	18	2	2	0	13.4128	4.40138	0.959847	4.5855	4.529e-06	2.71365e-05	VC0328	rpoB
NC_002505_KPS-14	+	341382	56	89	60	24	9	20	46.4093	2.29837	0.53738	4.277	1.89429e-05	8.90473e-05	VC0328	rpoB
NC_002505_KPS-14	+	341470	23	22	17	1	7	0	12.8161	3.21947	0.970668	3.31675	0.000910697	0.00228043	VC0328	rpoB
NC_002505_KPS-14	+	341535	33	43	40	5	14	14	26.5415	2.17036	0.570731	3.80277	0.000143088	0.000477223	VC0328	rpoB
NC_002505_KPS-14	+	341537	12	20	20	1	1	2	10.3608	4.06372	0.98958	4.10651	4.0169e-05	0.000166076	VC0328	rpoB
NC_002505_KPS-14	+	341588	27	9	29	2	6	1	13.3299	3.12105	0.893853	3.49168	0.000479993	0.0013205	VC0328	rpoB
NC_002505_KPS-14	+	341589	25	22	8	1	7	7	12.3554	2.22835	0.839829	2.65334	0.0079699	0.0149912	VC0328	rpoB
NC_002505_KPS-14	+	341885	239	108	187	26	26	40	111.43	2.86897	0.433098	6.62431	3.48877e-11	1.00911e-09	VC0328	rpoB
NC_002505_KPS-14	+	341889	22	8	12	2	5	2	9.03729	2.50743	0.883783	2.83715	0.00455179	0.00917147	VC0328	rpoB
NC_002505_KPS-14	+	341907	27	11	3	1	3	0	8.07825	3.59779	1.23138	2.92176	0.0034806	0.00725884	VC0328	rpoB
NC_002505_KPS-14	+	342083	95	68	81	37	17	27	57.2718	1.90422	0.464855	4.09638	4.19663e-05	0.000172325	VC0328	rpoB
NC_002505_KPS-14	+	342128	15	29	8	3	4	4	11.4612	2.59418	0.83938	3.09059	0.0019976	0.00448181	VC0328	rpoB
NC_002505_KPS-14	+	342438	35	7	18	0	3	0	11.3362	4.57679	1.21444	3.76863	0.000164144	0.000535308	VC0328	rpoB
NC_002505_KPS-14	+	342658	75	58	51	16	7	12	39.2968	2.71386	0.51925	5.22649	1.72753e-07	1.73553e-06	VC0328	rpoB
NC_002505_KPS-14	+	342974	47	49	49	11	14	15	32.9518	2.19619	0.478234	4.5923	4.38393e-06	2.64258e-05	VC0328	rpoB
NC_002505_KPS-14	+	343138	13	22	4	1	2	3	8.21237	3.07499	1.03522	2.97037	0.00297438	0.00633258	VC0328	rpoB
NC_002505_KPS-14	+	343669	18	24	23	1	1	1	12.6323	4.78034	1.03573	4.61543	3.92274e-06	2.41324e-05	VC0328	rpoB
NC_002505_KPS-14	+	343692	41	27	20	1	0	4	16.8861	4.50975	0.918684	4.90892	9.15783e-07	7.16617e-06	VC0328	rpoB
NC_002505_KPS-14	+	343696	16	8	22	9	1	5	10.7417	1.92757	0.870899	2.21331	0.0268766	0.043638	VC0328	rpoB
NC_002505_KPS-14	+	344046	49	10	19	0	9	3	15.8904	2.96893	0.994119	2.98649	0.00282198	0.00604604	VC0328	rpoB
NC_002505_KPS-14	+	344438	107	75	95	4	3	5	53.0167	4.86242	0.584896	8.31329	9.30821e-17	8.18675e-15	-	-
NC_002505_KPS-14	+	344512	15	22	11	2	0	3	9.71718	3.63947	0.987068	3.68715	0.000226777	0.000701276	-	VC0329
NC_002505_KPS-14	+	344521	16	20	12	4	2	6	10.7056	2.36411	0.771745	3.06334	0.00218883	0.00485016	-	VC0329
NC_002505_KPS-14	+	344522	33	58	39	3	9	14	28.1883	2.71294	0.630659	4.30175	1.69451e-05	8.11513e-05	-	VC0329
NC_002505_KPS-14	+	344735	32	24	34	1	1	2	17.2618	4.8341	0.90989	5.31284	1.07927e-07	1.15916e-06	-	VC0329
NC_002505_KPS-14	+	344849	22	23	21	4	1	1	13.2435	3.77026	0.861649	4.37563	1.2108e-05	6.15536e-05	-	VC0329
NC_002505_KPS-14	+	344931	28	7	17	3	6	2	11.1459	2.50842	0.865223	2.89917	0.00374155	0.00773282	-	VC0329
NC_002505_KPS-14	+	344933	54	13	14	4	8	10	17.7837	2.19493	0.770724	2.84788	0.00440114	0.00890335	-	VC0329
NC_002505_KPS-14	+	344978	26	16	15	0	0	0	10.5002	7.00598	1.38174	5.07042	3.96943e-07	3.52538e-06	-	VC0329
NC_002505_KPS-14	+	344995	91	66	86	2	4	2	46.2235	5.24429	0.671173	7.81362	5.5568e-15	3.50891e-13	-	VC0329
NC_002505_KPS-14	+	344996	16	20	14	3	3	4	10.8271	2.66825	0.768253	3.47314	0.000514408	0.00140118	-	VC0329
NC_002505_KPS-14	+	344997	21	18	16	0	4	2	11.1012	3.52641	0.911986	3.86674	0.0001103	0.000383406	-	VC0329
NC_002505_KPS-14	+	345007	34	13	9	3	10	5	12.8892	1.92137	0.818877	2.34635	0.0189584	0.0320967	-	VC0329
NC_002505_KPS-14	+	345008	27	18	6	2	7	4	11.3252	2.27961	0.864685	2.63635	0.00838029	0.0156667	-	VC0329
NC_002505_KPS-14	+	345156	70	67	63	3	3	6	38.9503	4.41079	0.600502	7.34518	2.05488e-13	9.6668e-12	-	VC0329
NC_002505_KPS-14	+	345261	22	16	11	6	1	4	10.6882	2.47659	0.827068	2.99442	0.00274967	0.00591131	-	VC0329
NC_002505_KPS-14	+	345337	68	70	67	5	3	0	39.5143	4.97194	0.724715	6.86055	6.85971e-12	2.34935e-10	-	VC0329
NC_002505_KPS-14	+	345391	28	6	23	1	5	4	11.8418	2.82599	0.895688	3.1551	0.00160443	0.00370158	-	VC0329
NC_002505_KPS-14	+	345395	22	21	20	5	2	3	13.2347	2.97839	0.745515	3.99508	6.46722e-05	0.000246149	-	VC0329
NC_002505_KPS-14	+	345698	22	11	9	0	1	0	7.85118	5.59641	1.43027	3.91284	9.12181e-05	0.000327423	-	VC0329
NC_002505_KPS-14	+	345699	77	73	86	6	2	7	46.1216	4.32472	0.57573	7.51172	5.8357e-14	3.04974e-12	-	VC0329
NC_002505_KPS-14	+	345785	34	16	18	2	5	1	13.706	3.36483	0.843245	3.99034	6.59799e-05	0.00025025	-	VC0329
NC_002505_KPS-14	+	345966	21	12	33	4	1	1	13.1522	3.75607	0.920327	4.08123	4.4797e-05	0.000181921	-	VC0329
NC_002505_KPS-14	+	345971	62	65	76	24	15	17	46.3067	2.17719	0.468352	4.64861	3.34174e-06	2.10944e-05	-	VC0329
NC_002505_KPS-14	+	346304	20	14	14	0	1	0	9.03241	5.80075	1.38103	4.20031	2.66549e-05	0.000118181	-	VC0329
NC_002505_KPS-14	+	346305	27	17	33	7	7	9	17.6339	2.07496	0.613619	3.3815	0.000720906	0.00186911	-	VC0329
NC_002505_KPS-14	+	346351	24	13	21	2	11	0	12.7676	2.3905	1.00893	2.36934	0.01782	0.030397	-	VC0329
NC_002505_KPS-14	+	346433	47	18	43	3	3	0	20.7741	4.43628	0.877056	5.05814	4.23355e-07	3.72531e-06	-	VC0329
NC_002505_KPS-14	+	346680	75	47	53	3	22	7	37.1623	2.73734	0.695576	3.93536	8.30731e-05	0.000303097	-	VC0329
NC_002505_KPS-14	+	346878	21	16	19	1	2	2	11.1125	3.82046	0.895225	4.26759	1.97592e-05	9.21701e-05	-	VC0329
NC_002505_KPS-14	+	346936	28	18	26	0	0	3	13.6843	4.96491	1.07773	4.60681	4.0889e-06	2.49738e-05	-	VC0329
NC_002505_KPS-14	+	347406	23	31	24	0	1	0	14.7836	6.51882	1.33131	4.89653	9.7542e-07	7.55613e-06	-	VC0329
NC_002505_KPS-14	+	347409	34	9	13	2	6	3	11.7986	2.62974	0.862661	3.0484	0.00230062	0.0050649	-	VC0329
NC_002505_KPS-14	+	347464	199	93	127	4	10	18	81.3544	4.06968	0.552676	7.36359	1.79032e-13	8.50379e-12	-	VC0329
NC_002505_KPS-14	+	347465	41	19	24	6	5	6	17.9204	2.61686	0.651952	4.01388	5.9729e-05	0.000230626	-	VC0329
NC_002505_KPS-14	+	347485	26	11	18	1	0	1	10.3652	5.10663	1.2425	4.10997	3.95705e-05	0.000164023	-	VC0329
NC_002505_KPS-14	+	347548	107	26	59	3	22	2	39.0957	3.05099	0.883452	3.45349	0.000553382	0.00149157	-	VC0329
NC_002505_KPS-14	+	347549	50	10	24	0	8	0	16.4662	3.60664	1.16201	3.10379	0.00191057	0.00431084	-	VC0329
NC_002505_KPS-14	+	347595	30	6	14	2	7	2	10.7318	2.44278	0.927898	2.6326	0.00847344	0.01582	-	VC0329
NC_002505_KPS-14	+	347603	20	2	8	1	2	2	6.11376	2.88053	1.1579	2.4877	0.012857	0.0228251	-	VC0329
NC_002505_KPS-14	+	347641	15	29	13	2	0	1	11.2213	4.59805	1.11115	4.13809	3.50213e-05	0.000148148	-	VC0329
NC_002505_KPS-14	+	347668	19	25	34	1	3	1	15.3873	4.29125	0.893366	4.80347	1.55943e-06	1.1223e-05	-	VC0329
NC_002505_KPS-14	+	348219	23	10	25	3	7	4	12.7783	2.35553	0.760893	3.09575	0.00196315	0.00441434	-	VC0329
NC_002505_KPS-14	+	348265	56	17	21	3	9	0	18.9753	3.18532	0.948329	3.35888	0.000782584	0.00200442	-	VC0329
NC_002505_KPS-14	+	348266	27	6	7	0	4	0	7.84054	3.55052	1.29024	2.75183	0.00592636	0.0115625	-	VC0329
NC_002505_KPS-14	+	348278	30	24	34	0	2	3	17.0365	4.49489	0.872547	5.15146	2.58467e-07	2.44826e-06	-	VC0329
NC_002505_KPS-14	+	348378	58	69	48	3	7	7	35.2034	3.71272	0.585019	6.34633	2.20515e-10	5.19841e-09	-	VC0329
NC_002505_KPS-14	+	348458	21	23	15	1	0	0	11.1713	6.10997	1.36064	4.49053	7.10478e-06	3.93819e-05	-	VC0329
NC_002505_KPS-14	+	348460	110	120	93	5	3	4	62.0733	5.08536	0.58557	8.68446	3.80538e-18	4.27482e-16	-	VC0329
NC_002505_KPS-14	+	348593	46	15	16	2	3	2	15.0309	3.75058	0.86754	4.32323	1.53758e-05	7.49362e-05	-	VC0329
NC_002505_KPS-14	+	350350	59	36	50	8	22	24	34.5897	1.76925	0.53484	3.30799	0.000939675	0.00234104	-	-
NC_002505_KPS-14	+	350627	37	8	23	7	6	12	15.9428	1.77265	0.723801	2.44908	0.0143223	0.0250989	VC0332	hemE
NC_002505_KPS-14	+	350770	24	14	20	2	9	8	13.463	1.94668	0.719047	2.7073	0.00678333	0.0130159	VC0332	hemE
NC_002505_KPS-14	+	350787	14	14	24	1	4	4	11.0074	2.88291	0.826574	3.48778	0.00048705	0.00133726	VC0332	hemE
NC_002505_KPS-14	+	350791	36	16	38	1	5	0	17.5197	4.1732	0.936007	4.45852	8.25287e-06	4.46611e-05	VC0332	hemE
NC_002505_KPS-14	+	350792	21	17	20	3	2	6	12.3244	2.75848	0.740868	3.72331	0.000196625	0.000623308	VC0332	hemE
NC_002505_KPS-14	+	350793	96	58	94	30	39	28	60.4182	1.65522	0.446201	3.70957	0.00020761	0.000652342	VC0332	hemE
NC_002505_KPS-14	+	350815	35	18	40	3	3	6	18.874	3.29951	0.704767	4.68171	2.84496e-06	1.8464e-05	VC0332	hemE
NC_002505_KPS-14	+	350951	22	1	14	2	0	3	7.35942	3.22209	1.2626	2.55194	0.0107125	0.0194251	VC0332	hemE
NC_002505_KPS-14	+	351030	19	18	33	6	6	11	16.3664	1.96561	0.642998	3.05695	0.00223602	0.00494143	VC0332	hemE
NC_002505_KPS-14	+	351225	38	28	34	4	4	7	20.6901	3.08164	0.61973	4.97256	6.60736e-07	5.42736e-06	VC0332	hemE
NC_002505_KPS-14	+	351326	27	37	14	13	5	11	18.917	1.77016	0.674731	2.6235	0.00870314	0.0161959	VC0332	hemE
NC_002505_KPS-14	+	351591	12	27	6	0	0	1	8.66625	5.74125	1.48207	3.8738	0.000107151	0.000374316	-	-
NC_002505_KPS-14	+	351968	20	14	20	9	4	7	12.977	1.75495	0.675256	2.59894	0.00935129	0.017243	-	VC0333
NC_002505_KPS-14	+	352077	55	51	52	4	5	9	31.9762	3.48952	0.560504	6.22567	4.79503e-10	1.03514e-08	-	VC0333
NC_002505_KPS-14	+	352283	12	47	17	2	2	4	15.6946	3.64245	0.894546	4.07184	4.6643e-05	0.000188065	-	VC0333
NC_002505_KPS-14	+	352284	6	27	6	0	1	6	8.40876	2.96539	1.18409	2.50436	0.0122674	0.0218849	-	VC0333
NC_002505_KPS-14	+	352292	15	55	11	0	1	0	15.6821	6.60353	1.45578	4.53608	5.73091e-06	3.29794e-05	-	VC0333
NC_002505_KPS-14	+	352347	2	34	2	0	3	0	7.90674	3.99607	1.59477	2.50574	0.0122195	0.0218095	-	-
NC_002505_KPS-14	+	352364	29	2	34	1	0	1	12.1159	5.34097	1.40811	3.79302	0.000148828	0.000492958	-	-
NC_002505_KPS-14	+	352385	20	25	18	3	8	10	14.8133	1.95032	0.668805	2.91613	0.00354407	0.00737226	-	-
NC_002505_KPS-14	+	352425	111	110	61	6	12	11	56.7505	3.61888	0.532084	6.80134	1.03649e-11	3.40398e-10	-	VC0334
NC_002505_KPS-14	+	352426	10	44	13	1	1	4	13.6821	3.90713	1.0121	3.86041	0.000113199	0.00039202	-	VC0334
NC_002505_KPS-14	+	352490	49	58	59	6	3	8	33.5037	3.64425	0.579118	6.29276	3.1187e-10	7.09743e-09	-	VC0334
NC_002505_KPS-14	+	352527	22	8	19	2	2	1	9.74598	3.58693	0.962044	3.72844	0.000192666	0.000612808	-	VC0334
NC_002505_KPS-14	+	352537	20	13	28	3	2	0	12.1087	3.88919	0.957124	4.06341	4.83602e-05	0.000193802	-	VC0334
NC_002505_KPS-14	+	352794	5	22	1	1	0	0	5.55886	5.07764	1.72133	2.94984	0.00317936	0.0067135	-	VC0334
NC_002505_KPS-14	+	353057	21	22	23	0	3	1	12.918	4.37401	0.968591	4.51585	6.30638e-06	3.57234e-05	-	VC0334
NC_002505_KPS-14	+	353156	25	22	28	0	0	3	14.3254	5.02944	1.06537	4.72083	2.34879e-06	1.57457e-05	-	VC0334
NC_002505_KPS-14	+	353266	18	16	25	1	1	2	11.5559	4.23155	0.962387	4.39693	1.09792e-05	5.67265e-05	-	VC0334
NC_002505_KPS-14	+	353338	20	19	22	3	0	2	12.0977	3.94694	0.916771	4.30526	1.66788e-05	8.00758e-05	-	VC0334
NC_002505_KPS-14	+	353416	27	23	36	4	0	1	16.7698	4.4169	0.911316	4.84672	1.25518e-06	9.34171e-06	-	-
NC_002505_KPS-14	+	353417	28	27	33	3	2	1	17.327	4.18976	0.808365	5.18301	2.18336e-07	2.11472e-06	-	-
NC_002505_KPS-14	+	356285	16	51	11	11	5	7	18.3704	2.11043	0.803354	2.62703	0.00861344	0.0160508	-	-
NC_002505_KPS-14	+	356585	5	35	6	0	4	4	10.0397	2.94284	1.15352	2.55119	0.0107357	0.0194615	-	-
NC_002505_KPS-14	+	356601	14	105	2	5	2	3	25.0251	3.97058	1.15937	3.42477	0.000615325	0.00163079	-	-
NC_002505_KPS-14	+	356631	4	24	2	0	0	1	5.93005	5.1822	1.68288	3.07937	0.00207441	0.00462949	-	-
NC_002505_KPS-14	+	361123	102	137	69	30	31	54	74.3383	1.79268	0.457848	3.91545	9.02355e-05	0.000324493	-	-
NC_002505_KPS-14	+	361129	20	23	20	8	8	10	15.6052	1.61841	0.595748	2.7166	0.00659559	0.0127023	-	-
NC_002505_KPS-14	+	361548	24	25	13	1	0	0	11.7131	6.17961	1.36848	4.51568	6.31134e-06	3.57439e-05	-	VC0341
NC_002505_KPS-14	+	361646	27	15	13	7	3	2	11.968	2.47188	0.804671	3.07191	0.00212694	0.00473039	-	VC0341
NC_002505_KPS-14	+	361697	26	37	19	7	15	12	20.4308	1.61138	0.612032	2.63284	0.00846734	0.0158116	-	VC0341
NC_002505_KPS-14	+	361848	22	10	14	3	2	3	9.6156	2.84099	0.841763	3.37504	0.000738037	0.00190752	-	-
NC_002505_KPS-14	+	361876	17	83	12	6	4	7	24.071	3.10999	0.871417	3.56889	0.000358493	0.00103238	VCt018	tRNA-Gly-4
NC_002505_KPS-14	+	361891	11	21	11	1	5	2	9.33375	2.76	0.914444	3.01823	0.00254253	0.00552346	VCt018	tRNA-Gly-4
NC_002505_KPS-14	+	361938	2927	4623	2341	113	133	221	1928.21	4.78678	0.418357	11.4419	2.58268e-30	1.67901e-27	-	-
NC_002505_KPS-14	+	361960	22	21	22	2	4	4	13.5686	3.04153	0.729806	4.16758	3.07846e-05	0.00013317	-	-
NC_002505_KPS-14	+	361961	50	35	35	1	21	5	26.3266	2.43125	0.83477	2.91248	0.00358577	0.00744651	-	-
NC_002505_KPS-14	+	362048	9076	18231	9031	614	701	902	7195.75	4.40227	0.424206	10.3777	3.13297e-25	1.04031e-22	-	-
NC_002505_KPS-14	+	362049	957	1729	868	91	120	169	725.718	3.60227	0.431968	8.33921	7.47913e-17	6.67045e-15	-	-
NC_002505_KPS-14	+	362050	63	102	60	11	16	27	50.0816	2.44152	0.512314	4.76567	1.88228e-06	1.3128e-05	-	-
NC_002505_KPS-14	+	362052	32	84	28	8	18	23	34.4558	1.94754	0.655472	2.9712	0.00296637	0.00631779	-	-
NC_002505_KPS-14	+	362053	59	144	65	25	51	24	66.0882	1.74463	0.594537	2.93444	0.00334154	0.00700824	-	-
NC_002505_KPS-14	+	362055	22	34	18	0	2	4	14.7373	4.01464	0.896372	4.47877	7.50743e-06	4.12683e-05	-	-
NC_002505_KPS-14	+	362056	53	159	60	9	10	26	58.1691	3.02017	0.644269	4.68775	2.76232e-06	1.80219e-05	-	-
NC_002505_KPS-14	+	362057	19	33	7	7	6	8	14.2302	1.84287	0.769154	2.39598	0.0165762	0.0285321	-	-
NC_002505_KPS-14	+	362071	18	64	21	3	3	7	21.5416	3.39167	0.804021	4.21838	2.46063e-05	0.000110528	-	-
NC_002505_KPS-14	+	362088	26	55	17	4	11	12	22.479	2.23731	0.709092	3.15518	0.00160399	0.00370064	-	-
NC_002505_KPS-14	+	362115	16	26	18	5	8	3	13.7581	2.21777	0.729318	3.04089	0.00235884	0.00517669	-	-
NC_002505_KPS-14	+	362134	5	50	4	4	0	3	12.5061	3.47924	1.24124	2.80303	0.00506252	0.0100701	-	-
NC_002505_KPS-14	+	362150	26	22	12	6	7	7	14.0913	1.90994	0.669867	2.85121	0.00435525	0.00882475	-	-
NC_002505_KPS-14	+	362151	92	67	67	7	15	6	46.1002	3.30796	0.551602	5.99701	2.00985e-09	3.66132e-08	-	-
NC_002505_KPS-14	+	362156	31	56	27	15	7	18	27.3232	1.88071	0.601818	3.12504	0.0017778	0.00404713	-	-
NC_002505_KPS-14	+	362157	47	25	23	1	1	0	17.7574	5.86956	1.18351	4.95946	7.06885e-07	5.74564e-06	-	-
NC_002505_KPS-14	+	362171	192	507	179	7	8	24	172.441	4.92345	0.632838	7.77995	7.2556e-15	4.49227e-13	-	-
NC_002505_KPS-14	+	362172	48	78	29	18	9	24	36.5587	1.97807	0.594722	3.32605	0.000880876	0.00221645	-	-
NC_002505_KPS-14	+	362175	55	40	22	5	17	8	26.1312	2.26326	0.664651	3.40518	0.000661196	0.0017359	-	-
NC_002505_KPS-14	+	362178	61	124	46	9	12	11	48.4696	3.20217	0.594562	5.38577	7.21362e-08	8.1979e-07	-	-
NC_002505_KPS-14	+	362188	35	130	36	14	11	15	44.3993	2.70163	0.679703	3.97472	7.04621e-05	0.000264186	-	-
NC_002505_KPS-14	+	362189	34	91	22	9	6	13	32.0474	2.78009	0.70715	3.9314	8.44535e-05	0.000307209	-	-
NC_002505_KPS-14	+	362280	829	1257	820	7	10	10	550.166	7.09955	0.480348	14.78	1.97072e-49	9.24672e-46	-	-
NC_002505_KPS-14	+	362281	38	47	26	4	3	3	22.2727	3.80428	0.702688	5.4139	6.1666e-08	7.18272e-07	-	-
NC_002505_KPS-14	+	362285	18	23	7	6	5	6	11.511	1.83373	0.765979	2.39397	0.016667	0.028673	-	-
NC_002505_KPS-14	+	362396	334	655	285	6	1	1	242.087	7.63709	0.756478	10.0956	5.77829e-24	1.58671e-21	-	-
NC_002505_KPS-14	+	362397	10	25	13	1	1	2	9.68454	3.96048	1.03492	3.82683	0.000129806	0.000439614	-	-
NC_002505_KPS-14	+	362506	1033	1753	942	4	4	13	705.336	7.87096	0.567473	13.8702	9.60417e-44	2.87904e-40	-	-
NC_002505_KPS-14	+	362507	245	311	223	1	8	5	147.928	6.1425	0.592532	10.3665	3.52099e-25	1.14796e-22	-	-
NC_002505_KPS-14	+	362508	16	20	15	4	0	5	10.8234	2.87553	0.872433	3.29599	0.000980744	0.00242717	-	-
NC_002505_KPS-14	+	362513	12	25	16	1	0	3	10.5619	4.12795	1.04199	3.9616	7.44477e-05	0.00027684	-	-
NC_002505_KPS-14	+	362514	177	199	235	1	4	4	115.482	6.43522	0.629989	10.2148	1.70211e-24	4.9645e-22	-	-
NC_002505_KPS-14	+	362526	15	29	14	8	5	5	13.6835	2.01884	0.724043	2.78828	0.00529885	0.0104803	-	-
NC_002505_KPS-14	+	362527	27	27	12	3	12	8	15.6891	1.85146	0.726488	2.54851	0.0108185	0.0195968	-	-
NC_002505_KPS-14	+	362528	20	32	17	2	10	5	15.5347	2.3552	0.755665	3.11672	0.00182875	0.00414791	-	-
NC_002505_KPS-14	+	362631	101	389	64	0	0	1	106.434	9.38169	1.3993	6.70455	2.02025e-11	6.17968e-10	-	-
NC_002505_KPS-14	+	362663	72	231	72	3	1	14	74.0092	4.85104	0.811195	5.98011	2.22986e-09	4.01266e-08	-	-
NC_002505_KPS-14	+	362664	403	897	222	17	8	30	296.551	5.20018	0.637437	8.15795	3.40761e-16	2.73615e-14	-	-
NC_002505_KPS-14	+	362665	10	50	8	1	1	0	13.4242	5.43239	1.36467	3.98074	6.87023e-05	0.000258822	-	-
NC_002505_KPS-14	+	362674	2	21	1	1	0	0	4.8389	4.86995	1.80951	2.69131	0.0071173	0.013576	-	-
NC_002505_KPS-14	+	362768	11	40	10	0	0	1	11.8058	6.19255	1.46453	4.22836	2.354e-05	0.000106537	-	-
NC_002505_KPS-14	+	362769	84	246	72	0	0	1	76.7778	8.90955	1.34684	6.61515	3.71169e-11	1.06758e-09	-	-
NC_002505_KPS-14	+	362777	44	141	21	3	2	2	40.4663	5.23729	0.921197	5.6853	1.3058e-08	1.87465e-07	-	-
NC_002505_KPS-14	+	362887	21	82	12	0	0	0	22.0791	8.07453	1.47632	5.46938	4.51603e-08	5.49955e-07	-	-
NC_002505_KPS-14	+	362888	126	339	93	1	0	1	106.536	8.50054	1.20196	7.07222	1.5247e-12	6.03599e-11	-	-
NC_002505_KPS-14	+	362896	26	95	16	4	1	4	27.5754	4.31599	0.916218	4.71066	2.46918e-06	1.64337e-05	-	-
NC_002505_KPS-14	+	363006	23	127	17	0	0	1	32.3641	7.65921	1.47032	5.20921	1.89649e-07	1.87524e-06	-	-
NC_002505_KPS-14	+	363007	23	102	13	1	0	2	26.9722	5.94138	1.20421	4.93383	8.06342e-07	6.42769e-06	-	-
NC_002505_KPS-14	+	363332	3	21	5	0	1	3	6.13831	3.31126	1.30804	2.53147	0.0113586	0.0204566	-	-
NC_002505_KPS-14	+	364217	17	9	27	4	4	8	12.0966	2.08254	0.757029	2.75095	0.00594234	0.0115887	-	-
NC_002505_KPS-14	+	364837	11	24	4	4	3	2	8.77884	2.44165	0.976782	2.49969	0.0124303	0.0221426	-	-
NC_002505_KPS-14	+	364839	102	160	78	15	9	19	70.2166	3.34761	0.519645	6.44212	1.17816e-10	2.98739e-09	-	-
NC_002505_KPS-14	+	364840	60	75	39	11	4	15	36.8698	2.90549	0.590364	4.92153	8.58722e-07	6.79055e-06	-	-
NC_002505_KPS-14	+	364841	129	178	87	28	37	50	90.6363	2.13937	0.453943	4.71286	2.44264e-06	1.62898e-05	-	-
NC_002505_KPS-14	+	364842	5	20	4	2	0	2	6.14101	3.2512	1.25138	2.5981	0.00937409	0.0172768	-	-
NC_002505_KPS-14	+	365016	33	25	33	20	7	6	21.9884	1.73984	0.665055	2.61609	0.00889437	0.0165075	-	VC0343
NC_002505_KPS-14	+	365122	20	11	19	0	0	0	9.21943	6.81824	1.40169	4.8643	1.1486e-06	8.67837e-06	-	VC0343
NC_002505_KPS-14	+	365263	104	82	87	16	13	24	58.3043	2.7119	0.427363	6.34566	2.21474e-10	5.21737e-09	-	VC0343
NC_002505_KPS-14	+	365385	32	38	29	3	2	8	20.322	3.31013	0.681558	4.85672	1.19347e-06	8.96841e-06	-	VC0344
NC_002505_KPS-14	+	365390	69	41	57	3	4	1	32.0552	4.68038	0.713244	6.5621	5.30557e-11	1.46472e-09	-	VC0344
NC_002505_KPS-14	+	365391	357	320	340	13	23	33	199.036	4.241	0.398568	10.6406	1.92854e-26	7.59572e-24	-	VC0344
NC_002505_KPS-14	+	365392	28	32	22	8	4	7	18.1332	2.44672	0.630711	3.8793	0.000104756	0.000367461	-	VC0344
NC_002505_KPS-14	+	365426	33	9	15	1	4	4	11.6437	2.98104	0.876416	3.4014	0.000670409	0.0017562	-	VC0344
NC_002505_KPS-14	+	365427	45	38	35	10	4	5	24.7912	2.94364	0.611874	4.81086	1.50283e-06	1.08854e-05	-	VC0344
NC_002505_KPS-14	+	365579	19	16	20	0	1	1	10.5041	5.12481	1.21676	4.21185	2.53289e-05	0.00011327	-	VC0344
NC_002505_KPS-14	+	365641	26	24	51	3	4	6	20.7125	3.31144	0.697604	4.74687	2.06587e-06	1.41749e-05	-	VC0344
NC_002505_KPS-14	+	365699	22	16	16	4	1	1	10.925	3.4684	0.894616	3.87697	0.000105767	0.000370418	-	VC0344
NC_002505_KPS-14	+	365737	18	20	16	1	0	3	10.6217	4.13407	1.00042	4.13234	3.59093e-05	0.000151293	-	VC0344
NC_002505_KPS-14	+	365886	58	37	49	1	1	2	27.1705	5.50578	0.876046	6.28481	3.28255e-10	7.41715e-09	-	VC0344
NC_002505_KPS-14	+	366005	30	26	34	3	1	11	18.763	2.99218	0.742298	4.03097	5.55475e-05	0.000217311	-	VC0344
NC_002505_KPS-14	+	366006	146	112	133	4	6	8	75.095	4.78201	0.511197	9.35455	8.39595e-21	1.4224e-18	-	VC0344
NC_002505_KPS-14	+	366007	70	46	72	13	0	17	39.0238	3.02306	0.77549	3.89826	9.68874e-05	0.000344371	-	VC0344
NC_002505_KPS-14	+	366014	28	13	27	9	4	6	15.3618	2.14588	0.689333	3.11297	0.00185213	0.00419344	-	VC0344
NC_002505_KPS-14	+	366020	159	115	161	9	2	15	84.2578	4.43357	0.556573	7.96585	1.64092e-15	1.15289e-13	-	VC0344
NC_002505_KPS-14	+	366189	50	45	57	4	1	1	29.2159	4.97829	0.776032	6.41505	1.40773e-10	3.48841e-09	-	VC0344
NC_002505_KPS-14	+	366214	6	20	13	3	0	2	8.16632	3.32946	1.07811	3.08824	0.00201347	0.0045121	-	VC0344
NC_002505_KPS-14	+	366260	23	25	21	0	0	0	12.8779	7.298	1.3465	5.41997	5.96085e-08	6.9732e-07	-	VC0344
NC_002505_KPS-14	+	366308	74	55	69	3	2	4	37.9962	4.79729	0.651715	7.36103	1.82503e-13	8.65235e-12	-	VC0344
NC_002505_KPS-14	+	366310	28	35	22	3	3	2	17.1256	3.73631	0.758665	4.92485	8.4426e-07	6.6914e-06	-	VC0344
NC_002505_KPS-14	+	366378	30	19	36	0	0	1	15.8551	6.62638	1.33266	4.97231	6.61586e-07	5.4331e-06	-	VC0344
NC_002505_KPS-14	+	366420	85	91	93	2	2	2	51.1012	5.8246	0.72327	8.05314	8.06962e-16	6.02247e-14	-	VC0344
NC_002505_KPS-14	+	366421	29	21	25	5	3	8	16.1809	2.57993	0.653121	3.95016	7.81003e-05	0.000288109	-	VC0344
NC_002505_KPS-14	+	366426	21	24	33	5	2	5	16.3428	3.04756	0.707873	4.30524	1.66807e-05	8.00807e-05	-	VC0344
NC_002505_KPS-14	+	366591	30	27	30	6	2	2	17.7249	3.42763	0.731099	4.68833	2.7544e-06	1.79757e-05	-	VC0344
NC_002505_KPS-14	+	366604	17	20	20	0	0	2	10.9101	5.21505	1.24046	4.20414	2.62079e-05	0.000116539	-	VC0344
NC_002505_KPS-14	+	366605	21	20	14	0	1	2	10.641	4.55777	1.07711	4.23149	2.32146e-05	0.000105284	-	VC0344
NC_002505_KPS-14	+	366728	81	52	76	0	1	1	38.9147	7.0409	1.12633	6.2512	4.07304e-10	8.97042e-09	-	VC0344
NC_002505_KPS-14	+	366821	41	40	31	2	1	2	21.5841	4.8243	0.82737	5.83088	5.51353e-09	8.88462e-08	-	VC0344
NC_002505_KPS-14	+	366863	59	46	74	2	0	1	33.6873	6.23016	0.972043	6.40934	1.46147e-10	3.60086e-09	-	VC0344
NC_002505_KPS-14	+	366903	54	15	33	3	0	0	19.0467	5.35358	1.1061	4.84003	1.2982e-06	9.61679e-06	-	VC0344
NC_002505_KPS-14	+	366969	17	28	12	2	0	2	11.3107	4.19699	1.02395	4.09883	4.1525e-05	0.000170818	-	VC0344
NC_002505_KPS-14	+	366994	26	27	25	4	1	0	15.3541	4.25582	0.913894	4.65679	3.21171e-06	2.0429e-05	-	VC0344
NC_002505_KPS-14	+	367049	32	39	37	7	2	3	22.0408	3.49034	0.69002	5.05832	4.22977e-07	3.72228e-06	-	VC0344
NC_002505_KPS-14	+	367058	65	53	35	5	7	7	31.1535	3.33858	0.580711	5.74913	8.97029e-09	1.35334e-07	-	VC0344
NC_002505_KPS-14	+	367079	57	53	63	6	1	3	33.7147	4.43768	0.673918	6.58489	4.55216e-11	1.28065e-09	VC0345	mutL
NC_002505_KPS-14	+	367084	142	107	155	4	5	8	77.3807	4.91574	0.528397	9.30312	1.36383e-20	2.22327e-18	VC0345	mutL
NC_002505_KPS-14	+	367142	61	45	29	1	0	0	25.1066	7.29155	1.30803	5.57444	2.48329e-08	3.27816e-07	VC0345	mutL
NC_002505_KPS-14	+	367173	44	42	44	6	4	6	26.5713	3.35828	0.583729	5.75315	8.75954e-09	1.32637e-07	VC0345	mutL
NC_002505_KPS-14	+	367195	39	20	32	5	1	6	18.4691	3.26397	0.723328	4.51243	6.4088e-06	3.61971e-05	VC0345	mutL
NC_002505_KPS-14	+	367258	5	20	6	2	0	0	6.26497	4.27956	1.44882	2.95382	0.0031387	0.00663778	VC0345	mutL
NC_002505_KPS-14	+	367262	19	39	21	0	0	0	14.9412	7.51068	1.37111	5.47782	4.30587e-08	5.28582e-07	VC0345	mutL
NC_002505_KPS-14	+	367268	12	15	23	1	1	0	9.68654	4.96291	1.24544	3.98488	6.75145e-05	0.000255093	VC0345	mutL
NC_002505_KPS-14	+	367309	61	61	58	1	3	2	34.4336	5.243	0.746145	7.02678	2.11347e-12	8.09941e-11	VC0345	mutL
NC_002505_KPS-14	+	367350	51	52	51	4	5	11	31.54	3.31355	0.564702	5.86778	4.41664e-09	7.31364e-08	VC0345	mutL
NC_002505_KPS-14	+	367351	11	17	23	3	1	3	10.608	3.21971	0.875708	3.67669	0.000236278	0.00072618	VC0345	mutL
NC_002505_KPS-14	+	367374	24	22	22	3	0	2	13.3862	4.10224	0.899331	4.56143	5.08053e-06	2.98252e-05	VC0345	mutL
NC_002505_KPS-14	+	367375	204	201	217	5	3	8	118.196	5.63392	0.519022	10.8549	1.89062e-27	8.32778e-25	VC0345	mutL
NC_002505_KPS-14	+	367376	24	31	26	0	0	0	15.1734	7.53408	1.33435	5.64626	1.63974e-08	2.2901e-07	VC0345	mutL
NC_002505_KPS-14	+	367502	18	18	22	1	0	0	10.9762	6.08439	1.35547	4.48875	7.1642e-06	3.96705e-05	VC0345	mutL
NC_002505_KPS-14	+	367572	96	136	101	4	1	5	63.9335	5.41906	0.644819	8.404	4.3152e-17	4.04239e-15	VC0345	mutL
NC_002505_KPS-14	+	367580	20	50	15	1	0	3	16.6976	4.81908	1.0492	4.5931	4.3671e-06	2.6349e-05	VC0345	mutL
NC_002505_KPS-14	+	367582	69	178	39	4	2	4	55.9093	5.20841	0.796638	6.53799	6.23527e-11	1.69494e-09	VC0345	mutL
NC_002505_KPS-14	+	367583	13	46	2	5	2	2	13.0922	3.09856	1.10649	2.80036	0.00510462	0.0101441	VC0345	mutL
NC_002505_KPS-14	+	367603	11	22	8	3	7	5	9.98884	1.79739	0.817637	2.19827	0.0279297	0.0451441	VC0345	mutL
NC_002505_KPS-14	+	367654	4	23	2	1	0	3	6.14642	3.31529	1.37656	2.40839	0.0160229	0.0276894	VC0345	mutL
NC_002505_KPS-14	+	367682	25	31	18	3	1	4	14.9955	3.56872	0.791356	4.50963	6.49408e-06	3.65983e-05	VC0345	mutL
NC_002505_KPS-14	+	367771	30	45	13	8	9	14	21.0344	1.87188	0.663478	2.82132	0.00478266	0.009583	VC0345	mutL
NC_002505_KPS-14	+	367905	30	21	16	4	4	4	14.1612	2.8003	0.711227	3.93729	8.24081e-05	0.000301154	VC0345	mutL
NC_002505_KPS-14	+	367921	10	22	26	9	7	7	14.4168	1.67017	0.69907	2.38913	0.0168883	0.0290092	VC0345	mutL
NC_002505_KPS-14	+	368028	45	12	19	1	3	5	15.0429	3.41291	0.853747	3.99757	6.39971e-05	0.000244076	VC0345	mutL
NC_002505_KPS-14	+	368264	25	8	12	1	3	5	9.45542	2.66463	0.892805	2.98456	0.00283987	0.00607968	VC0345	mutL
NC_002505_KPS-14	+	368396	31	19	23	0	0	1	13.5899	6.40273	1.33617	4.79185	1.6525e-06	1.17851e-05	VC0345	mutL
NC_002505_KPS-14	+	368397	56	59	54	4	1	8	33.3385	4.07498	0.642253	6.34482	2.22688e-10	5.24026e-09	VC0345	mutL
NC_002505_KPS-14	+	368405	21	8	19	1	4	6	10.3573	2.47833	0.844567	2.93444	0.00334148	0.00700824	VC0345	mutL
NC_002505_KPS-14	+	368518	9	27	16	2	0	4	10.7214	3.52612	0.99729	3.5357	0.000406691	0.00114886	VC0345	mutL
NC_002505_KPS-14	+	368664	39	17	52	8	6	3	22.5388	2.94676	0.714744	4.12281	3.74272e-05	0.000156625	VC0345	mutL
NC_002505_KPS-14	+	368781	42	42	51	5	3	4	26.9631	3.82403	0.631319	6.05721	1.38501e-09	2.63283e-08	VC0345	mutL
NC_002505_KPS-14	+	368981	32	21	35	5	0	4	17.5983	3.62659	0.798373	4.54247	5.55985e-06	3.21813e-05	VC0345	mutL
NC_002505_KPS-14	+	369021	21	15	19	2	4	3	11.5227	2.93594	0.774896	3.78881	0.000151369	0.000500177	VC0345	mutL
NC_002505_KPS-14	+	369372	26	22	24	7	1	11	16.0496	2.29813	0.725436	3.16793	0.0015353	0.00356257	VC0346	miaA
NC_002505_KPS-14	+	369546	22	18	28	2	1	1	13.2468	4.4107	0.943275	4.67594	2.9261e-06	1.89133e-05	VC0346	miaA
NC_002505_KPS-14	+	369603	39	23	13	8	15	7	18.3438	1.60499	0.686218	2.3389	0.0193407	0.0326737	VC0346	miaA
NC_002505_KPS-14	+	369717	24	10	16	2	4	1	10.2453	3.11731	0.894267	3.48588	0.000490525	0.00134543	VC0346	miaA
NC_002505_KPS-14	+	369746	28	10	13	5	5	4	11.4028	2.15627	0.768973	2.80409	0.00504595	0.0100428	VC0346	miaA
NC_002505_KPS-14	+	369769	20	2	4	0	1	1	4.91557	3.99925	1.52056	2.63011	0.00853561	0.0159211	VC0346	miaA
NC_002505_KPS-14	+	369784	24	11	19	5	7	7	12.7253	1.82576	0.683457	2.67136	0.00755456	0.0143024	VC0346	miaA
NC_002505_KPS-14	+	369916	10	32	3	1	4	1	9.54174	3.24012	1.14623	2.82677	0.00470207	0.00944079	VC0346	miaA
NC_002505_KPS-14	+	369954	22	11	15	10	5	2	11.4893	1.75381	0.806806	2.17378	0.029722	0.047701	VC0346	miaA
NC_002505_KPS-14	+	370425	124	64	141	32	43	64	80.7875	1.59136	0.454529	3.50113	0.000463294	0.00128146	-	-
NC_002505_KPS-14	+	370491	42	11	48	11	8	8	22.5624	2.1961	0.696584	3.15267	0.00161783	0.0037293	-	VC0348
NC_002505_KPS-14	+	370495	879	654	1093	74	64	128	525.536	3.66561	0.376246	9.74259	1.98424e-22	4.39699e-20	-	VC0348
NC_002505_KPS-14	+	370496	397	334	509	89	48	111	266.602	2.67528	0.403826	6.62485	3.47609e-11	1.00598e-09	-	VC0348
NC_002505_KPS-14	+	370497	123	123	149	37	18	49	88.68	2.2874	0.441156	5.18501	2.16004e-07	2.09532e-06	-	VC0348
NC_002505_KPS-14	+	370503	24	4	26	1	4	2	10.9023	3.24289	0.99792	3.24965	0.00115549	0.00279345	-	VC0348
NC_002505_KPS-14	+	370504	30	12	20	3	1	3	12.3702	3.46874	0.852023	4.07118	4.67752e-05	0.000188493	-	VC0348
NC_002505_KPS-14	+	370505	19	4	20	2	4	1	8.94163	2.88864	1.00182	2.8834	0.00393407	0.00807559	-	VC0348
NC_002505_KPS-14	+	370611	48	16	52	13	5	25	27.326	1.80367	0.685287	2.632	0.00848851	0.0158454	-	VC0348
NC_002505_KPS-14	+	370612	56	52	53	5	4	19	33.7945	2.92809	0.605213	4.83812	1.31073e-06	9.69436e-06	-	VC0348
NC_002505_KPS-14	+	370695	20	9	15	6	2	2	9.61848	2.42006	0.856493	2.82555	0.00472	0.00947274	-	VC0348
NC_002505_KPS-14	+	371093	92	24	64	13	22	34	42.6691	1.72385	0.59384	2.90289	0.00369739	0.00765254	-	VC0348
NC_002505_KPS-14	+	371219	40	19	44	11	9	12	23.7031	2.00804	0.579994	3.46218	0.000535824	0.0014508	-	VC0348
NC_002505_KPS-14	+	371287	21	6	16	3	3	6	9.56471	2.17824	0.831551	2.61949	0.00880622	0.0163637	-	VC0348
NC_002505_KPS-14	+	371529	48	20	63	7	1	1	25.5506	4.13257	0.858246	4.81513	1.47103e-06	1.06938e-05	-	VC0348
NC_002505_KPS-14	+	371596	22	8	9	1	5	5	8.68915	2.15354	0.891846	2.4147	0.0157482	0.0272731	-	VC0348
NC_002505_KPS-14	+	371612	14	20	12	3	2	10	10.6976	2.02584	0.802156	2.5255	0.0115534	0.0207602	-	VC0348
NC_002505_KPS-14	+	371874	56	47	45	20	2	35	35.4317	1.77676	0.724393	2.45275	0.0141767	0.0248798	-	VC0349
NC_002505_KPS-14	+	371875	31	72	50	13	12	13	34.6398	2.35876	0.565293	4.17263	3.01106e-05	0.000130773	-	VC0349
NC_002505_KPS-14	+	371936	176	84	176	59	47	52	103.87	1.7686	0.438055	4.03739	5.40481e-05	0.000212423	-	VC0349
NC_002505_KPS-14	+	372134	14	24	9	4	3	3	10.3655	2.56911	0.834213	3.07969	0.00207219	0.0046254	-	VC0349
NC_002505_KPS-14	+	372146	17	43	27	11	11	5	20.6768	2.00026	0.689095	2.90273	0.00369921	0.00765542	-	VC0349
NC_002505_KPS-14	+	372167	38	53	37	11	13	0	27.8756	2.66009	0.854984	3.11128	0.0018628	0.00421548	-	VC0349
NC_002505_KPS-14	+	372190	11	32	14	4	1	3	12.0389	3.19535	0.89904	3.55418	0.000379155	0.00108155	-	VC0349
NC_002505_KPS-14	+	372207	29	69	29	14	7	17	29.6253	2.11812	0.631909	3.35194	0.000802487	0.00204713	-	VC0349
NC_002505_KPS-14	+	372315	27	19	38	7	3	1	17.3222	3.20873	0.792953	4.04656	5.1975e-05	0.000205563	-	VC0349
NC_002505_KPS-14	+	372460	35	43	40	10	8	7	25.8629	2.56149	0.558199	4.58885	4.45691e-06	2.67909e-05	-	VC0349
NC_002505_KPS-14	+	372495	59	90	41	8	21	20	42.8856	2.31413	0.570019	4.05973	4.91287e-05	0.000196197	-	VC0349
NC_002505_KPS-14	+	372625	23	40	19	4	9	7	18.4262	2.38307	0.67695	3.52031	0.000431046	0.00120589	-	VC0349
NC_002505_KPS-14	+	372777	26	27	27	5	3	2	16.4624	3.31188	0.721462	4.59052	4.42142e-06	2.66146e-05	-	VC0349
NC_002505_KPS-14	+	372780	46	48	50	0	3	1	27.4675	5.50284	0.886448	6.20775	5.37499e-10	1.14286e-08	-	VC0349
NC_002505_KPS-14	+	372781	38	36	24	2	3	11	20.4095	3.01214	0.702613	4.28706	1.81055e-05	8.56858e-05	-	VC0349
NC_002505_KPS-14	+	372816	22	28	11	1	2	0	11.9003	4.65466	1.10014	4.23097	2.32688e-05	0.000105495	-	VC0349
NC_002505_KPS-14	+	372890	14	27	19	2	2	3	12.3494	3.46064	0.839082	4.12431	3.7184e-05	0.000155806	-	VC0349
NC_002505_KPS-14	+	372921	19	35	18	7	7	15	17.7281	1.69823	0.645532	2.63074	0.00851985	0.0158943	-	VC0349
NC_002505_KPS-14	+	373088	29	54	30	5	14	11	25.7598	2.26647	0.625815	3.62162	0.00029276	0.000869778	-	VC0350
NC_002505_KPS-14	+	373108	55	41	66	10	10	17	35.4089	2.47984	0.501051	4.94927	7.44923e-07	6.00866e-06	-	VC0350
NC_002505_KPS-14	+	373203	21	22	19	2	7	8	14.0104	2.22556	0.694189	3.20598	0.00134604	0.00318248	-	VC0350
NC_002505_KPS-14	+	373375	30	18	30	7	3	3	16.398	2.88349	0.712585	4.04652	5.19851e-05	0.000205595	-	VC0350
NC_002505_KPS-14	+	373384	32	10	26	2	8	2	14.2805	2.77345	0.846069	3.27804	0.00104531	0.0025638	-	VC0350
NC_002505_KPS-14	+	373388	42	36	37	5	11	10	25.1848	2.48117	0.555145	4.46942	7.84335e-06	4.28356e-05	-	VC0350
NC_002505_KPS-14	+	373474	25	24	26	13	6	12	18.5425	1.61121	0.584327	2.75738	0.00582664	0.0113921	-	VC0350
NC_002505_KPS-14	+	373879	448	73	544	129	156	145	258.608	1.60316	0.633825	2.52934	0.0114277	0.0205633	-	VC0350
NC_002505_KPS-14	+	373966	56	47	52	0	1	3	29.3201	5.63582	0.879907	6.40501	1.50357e-10	3.69278e-09	-	-
NC_002505_KPS-14	+	373971	17	29	26	3	3	3	14.902	3.34442	0.758843	4.40726	1.04686e-05	5.44584e-05	-	-
NC_002505_KPS-14	+	374134	88	151	73	6	4	3	60.795	4.91473	0.645817	7.6101	2.73882e-14	1.52118e-12	-	VC0351
NC_002505_KPS-14	+	374235	2	28	4	1	0	0	6.78203	5.37181	1.68434	3.18926	0.00142638	0.0033424	-	-
NC_002505_KPS-14	+	375256	124	79	103	38	31	57	74.791	1.62536	0.396916	4.09497	4.22215e-05	0.000173208	-	-
NC_002505_KPS-14	+	375514	26	13	18	9	9	3	13.7461	1.70511	0.727776	2.34291	0.019134	0.0323584	-	-
NC_002505_KPS-14	+	375590	23	8	19	1	0	0	9.31291	5.847	1.41272	4.13881	3.49109e-05	0.000147767	-	VC0354
NC_002505_KPS-14	+	375600	22	3	20	0	1	0	8.33799	5.68526	1.51433	3.75429	0.000173831	0.000561706	-	VC0354
NC_002505_KPS-14	+	375602	21	3	15	3	3	2	8.28287	2.56274	0.981993	2.60973	0.00906136	0.0167766	-	VC0354
NC_002505_KPS-14	+	375609	32	8	33	7	3	6	15.7148	2.50025	0.778635	3.21106	0.00132245	0.00313452	-	VC0354
NC_002505_KPS-14	+	375610	45	9	39	2	5	2	18.309	3.6496	0.866017	4.21424	2.50622e-05	0.000112244	-	VC0354
NC_002505_KPS-14	+	375969	20	16	20	0	2	4	11.2151	3.59583	0.900489	3.9932	6.51888e-05	0.000247824	-	VC0354
NC_002505_KPS-14	+	376223	41	13	26	13	7	12	19.3215	1.62941	0.644848	2.52681	0.0115104	0.0206922	-	VC0354
NC_002505_KPS-14	+	376533	949	456	851	177	173	180	493.936	2.39483	0.381472	6.27785	3.43286e-10	7.72444e-09	-	-
NC_002505_KPS-14	+	377046	45	25	47	0	1	0	21.7502	7.0836	1.31114	5.40264	6.56661e-08	7.57104e-07	-	VC0355
NC_002505_KPS-14	+	377123	22	11	19	0	1	1	9.85335	5.03284	1.24074	4.05631	4.98533e-05	0.000198583	-	VC0355
NC_002505_KPS-14	+	377180	27	9	20	2	0	1	10.6826	4.53013	1.11545	4.06125	4.88097e-05	0.000195204	-	VC0355
NC_002505_KPS-14	+	377226	23	19	46	2	0	0	16.7105	5.77084	1.2263	4.70588	2.52768e-06	1.67432e-05	-	VC0355
NC_002505_KPS-14	+	377362	12	9	22	1	3	3	9.01235	2.96352	0.912503	3.24769	0.00116347	0.00280923	-	VC0356
NC_002505_KPS-14	+	377392	20	20	33	4	0	5	14.8982	3.38763	0.832092	4.07122	4.67678e-05	0.00018847	-	VC0356
NC_002505_KPS-14	+	377393	17	23	12	2	0	5	10.7019	3.29321	0.932741	3.53068	0.000414496	0.00116731	-	VC0356
NC_002505_KPS-14	+	377407	68	50	59	2	4	1	33.8685	4.96882	0.723498	6.86777	6.52134e-12	2.242e-10	-	VC0356
NC_002505_KPS-14	+	377408	32	26	28	6	1	7	17.9695	2.97137	0.696057	4.26886	1.96473e-05	9.1743e-05	-	VC0356
NC_002505_KPS-14	+	377467	47	23	27	8	4	12	21.2363	2.35795	0.625295	3.77094	0.000162631	0.000531127	-	VC0356
NC_002505_KPS-14	+	377492	21	16	19	0	2	2	10.9503	4.15297	0.977272	4.24955	2.142e-05	9.84994e-05	-	VC0356
NC_002505_KPS-14	+	377649	29	16	43	5	2	2	17.659	3.59111	0.795601	4.51371	6.37043e-06	3.60238e-05	-	VC0356
NC_002505_KPS-14	+	377789	19	21	22	0	4	2	12.4701	3.70695	0.892651	4.15275	3.28508e-05	0.000140547	-	VC0357
NC_002505_KPS-14	+	377845	107	80	96	9	7	8	56.0171	3.88243	0.49022	7.91978	2.37939e-15	1.62312e-13	-	VC0357
NC_002505_KPS-14	+	377862	31	19	15	4	1	4	13.2743	3.18398	0.798876	3.98558	6.73169e-05	0.000254462	-	VC0357
NC_002505_KPS-14	+	377923	25	30	49	2	11	8	22.5532	2.65498	0.6941	3.82506	0.000130738	0.000442118	-	VC0357
NC_002505_KPS-14	+	377924	41	48	45	6	6	29	30.629	2.14034	0.642888	3.32926	0.000870775	0.00219472	-	VC0357
NC_002505_KPS-14	+	377953	40	35	47	0	3	0	23.1701	5.65872	1.0082	5.61271	1.99181e-08	2.7082e-07	-	VC0357
NC_002505_KPS-14	+	377954	30	14	27	2	0	2	13.6305	4.4824	0.975572	4.59464	4.33497e-06	2.61935e-05	-	VC0357
NC_002505_KPS-14	+	378028	45	29	47	4	2	4	23.8501	3.9279	0.682574	5.75455	8.68749e-09	1.31675e-07	-	VC0357
NC_002505_KPS-14	+	378029	22	12	23	0	1	1	10.8011	5.16817	1.23048	4.20011	2.66784e-05	0.00011827	-	VC0357
NC_002505_KPS-14	+	378054	94	86	84	1	5	3	50.4375	5.20744	0.650061	8.01069	1.14069e-15	8.23411e-14	-	VC0358
NC_002505_KPS-14	+	378055	29	44	11	5	3	2	17.3347	3.38483	0.835489	4.05131	5.09308e-05	0.000202092	-	VC0358
NC_002505_KPS-14	+	378056	12	20	15	0	1	2	9.26032	4.3487	1.11041	3.91628	8.9924e-05	0.000323629	-	VC0358
NC_002505_KPS-14	+	378057	19	34	36	3	19	13	21.9253	1.69991	0.71083	2.39144	0.0167822	0.0288472	-	VC0358
NC_002505_KPS-14	+	378182	8	10	25	1	0	1	8.34489	4.78137	1.31858	3.62614	0.000287689	0.000857047	-	VC0358
NC_002505_KPS-14	+	378211	53	29	47	1	3	0	24.4147	5.30521	0.914607	5.80054	6.61018e-09	1.04261e-07	-	VC0358
NC_002505_KPS-14	+	378246	20	0	16	2	2	0	7.13149	3.38308	1.44709	2.33784	0.0193955	0.0327538	-	VC0358
NC_002505_KPS-14	+	378259	38	35	20	1	0	1	17.5637	5.87995	1.18623	4.95684	7.16484e-07	5.81228e-06	-	VC0358
NC_002505_KPS-14	+	378326	6	10	23	0	0	0	7.3332	6.48473	1.51582	4.27803	1.88554e-05	8.86749e-05	-	-
NC_002505_KPS-14	+	378329	21	20	17	2	2	0	11.4368	4.15603	0.974886	4.2631	2.01614e-05	9.37545e-05	-	-
NC_002505_KPS-14	+	378366	11	7	28	0	0	2	8.80259	4.9183	1.369	3.59262	0.000327367	0.00095679	-	-
NC_002505_KPS-14	+	378425	32	90	16	14	19	16	33.6403	1.84787	0.713427	2.59014	0.00959379	0.0176317	-	-
NC_002505_KPS-14	+	378428	78	305	68	52	25	44	104.446	2.26791	0.675184	3.35896	0.000782369	0.00200398	-	-
NC_002505_KPS-14	+	378429	12	67	12	9	7	7	21.0108	2.34684	0.849207	2.76356	0.00571743	0.0112063	-	-
NC_002505_KPS-14	+	378515	8	30	22	7	6	13	15.1649	1.60258	0.737651	2.17254	0.0298149	0.0478227	VC0359	rpsL
NC_002505_KPS-14	+	378641	58	63	49	3	5	2	33.2602	4.40643	0.659123	6.68529	2.30464e-11	6.94527e-10	VC0359	rpsL
NC_002505_KPS-14	+	378642	23	26	7	0	8	4	12.2285	2.55535	0.982482	2.60092	0.00929751	0.0171564	VC0359	rpsL
NC_002505_KPS-14	+	378643	20	22	11	1	6	3	11.3847	2.73306	0.841976	3.246	0.00117039	0.00282289	VC0359	rpsL
NC_002505_KPS-14	+	378644	40	28	20	2	7	4	18.1894	3.07418	0.713678	4.30752	1.65096e-05	7.9404e-05	VC0359	rpsL
NC_002505_KPS-14	+	378684	23	25	18	5	1	3	13.6626	3.20484	0.786022	4.07729	4.55631e-05	0.000184444	VC0359	rpsL
NC_002505_KPS-14	+	378846	29	31	7	2	2	4	13.6259	3.42463	0.893835	3.83138	0.000127425	0.000432797	VC0359	rpsL
NC_002505_KPS-14	+	379469	8	30	12	3	2	5	10.9953	2.71569	0.891233	3.04711	0.00231051	0.00508379	-	-
NC_002505_KPS-14	+	379533	22	12	19	8	3	6	12.2959	1.95706	0.716533	2.73129	0.00630864	0.0122116	-	-
NC_002505_KPS-14	+	380012	34	38	40	2	0	3	21.6247	4.84638	0.845663	5.73086	9.99234e-09	1.48409e-07	-	VC0361
NC_002505_KPS-14	+	380321	30	31	46	12	7	12	24.5445	2.12733	0.560458	3.79571	0.000147224	0.000488635	-	VC0361
NC_002505_KPS-14	+	380432	41	40	23	3	4	6	21.2269	3.3496	0.666797	5.02342	5.07596e-07	4.33887e-06	-	VC0361
NC_002505_KPS-14	+	380519	44	59	27	3	3	5	25.9611	3.92018	0.695524	5.63631	1.73737e-08	2.40591e-07	-	VC0361
NC_002505_KPS-14	+	380653	33	47	27	8	16	19	26.3251	1.6787	0.562058	2.9867	0.00282005	0.00604228	-	VC0361
NC_002505_KPS-14	+	380654	240	177	176	6	6	13	113.313	4.91997	0.477086	10.3125	6.18419e-25	1.92884e-22	-	VC0361
NC_002505_KPS-14	+	380655	28	21	27	2	0	4	14.9135	4.02834	0.856238	4.70469	2.54249e-06	1.68206e-05	-	VC0361
NC_002505_KPS-14	+	380663	88	148	98	6	20	32	71.0948	2.92856	0.573054	5.11044	3.21409e-07	2.94275e-06	-	VC0361
NC_002505_KPS-14	+	380780	8	28	10	2	0	3	9.49271	3.60604	1.0785	3.34356	0.000827121	0.00210061	-	VC0361
NC_002505_KPS-14	+	380934	28	3	13	0	0	1	8.03594	5.63856	1.534	3.67573	0.000237174	0.000728458	-	VC0361
NC_002505_KPS-14	+	380936	67	38	58	2	2	6	31.4495	4.38008	0.677698	6.46317	1.02534e-10	2.64401e-09	-	VC0361
NC_002505_KPS-14	+	380947	27	8	8	2	4	6	9.50094	2.17056	0.876074	2.47759	0.0132272	0.0234014	-	VC0361
NC_002505_KPS-14	+	380963	55	34	46	2	10	4	27.3444	3.3805	0.670077	5.04494	4.53657e-07	3.95333e-06	-	VC0361
NC_002505_KPS-14	+	380974	34	14	23	2	7	2	14.695	2.97137	0.801386	3.70779	0.000209079	0.000655924	-	VC0361
NC_002505_KPS-14	+	381075	41	9	16	0	2	1	12.3668	4.75486	1.14922	4.13745	3.5118e-05	0.000148458	-	VC0361
NC_002505_KPS-14	+	381180	30	27	29	4	3	6	17.8752	3.07375	0.652908	4.70779	2.50421e-06	1.66286e-05	-	VC0361
NC_002505_KPS-14	+	381313	29	37	14	3	3	1	16.0674	3.82405	0.850965	4.49378	6.99687e-06	3.89096e-05	-	VC0361
NC_002505_KPS-14	+	381314	13	62	15	11	3	13	21.2017	2.14195	0.84028	2.54909	0.0108005	0.0195684	-	VC0361
NC_002505_KPS-14	+	381375	24	3	9	0	2	2	7.03343	3.48301	1.21451	2.86784	0.00413284	0.00842917	-	VC0361
NC_002505_KPS-14	+	381659	31	70	31	8	7	14	29.1961	2.57068	0.625026	4.11291	3.90706e-05	0.00016232	-	-
NC_002505_KPS-14	+	381723	31	11	11	1	6	2	11.007	2.83681	0.918873	3.08727	0.00202004	0.00452473	-	-
NC_002505_KPS-14	+	382030	39	13	23	6	8	8	16.9317	2.07722	0.666546	3.11639	0.0018308	0.0041522	VC0362	tuf
NC_002505_KPS-14	+	382769	137	280	121	19	23	28	112.061	3.30677	0.507398	6.51711	7.16765e-11	1.91511e-09	VC0362	tuf
NC_002505_KPS-14	+	382770	89	228	53	17	16	15	77.6072	3.29392	0.639771	5.14859	2.62448e-07	2.47791e-06	VC0362	tuf
NC_002505_KPS-14	+	382773	31	85	36	11	15	11	34.4793	2.38284	0.627454	3.79763	0.000146089	0.000485465	VC0362	tuf
NC_002505_KPS-14	+	382774	154	316	121	15	15	37	121.326	3.54972	0.558893	6.35134	2.13452e-10	5.04714e-09	VC0362	tuf
NC_002505_KPS-14	+	382775	25	105	25	8	12	6	33.7188	2.91553	0.771454	3.77927	0.000157292	0.000516711	VC0362	tuf
NC_002505_KPS-14	+	382776	14	27	3	4	4	5	10.2422	2.11684	0.930504	2.27493	0.0229098	0.0379527	VC0362	tuf
NC_002505_KPS-14	+	382777	9	25	7	0	5	1	8.73544	3.10176	1.13384	2.73562	0.0062263	0.0120726	VC0362	tuf
NC_002505_KPS-14	+	382778	386	263	237	5	26	5	169.186	4.88688	0.657423	7.43338	1.05856e-13	5.25952e-12	VC0362	tuf
NC_002505_KPS-14	+	382906	4510	4688	4404	82	93	167	2585.8	5.68636	0.336277	16.9098	3.81202e-64	8.22764e-60	VC0362	tuf
NC_002505_KPS-14	+	382907	1051	1694	994	38	47	67	725.767	4.9906	0.409364	12.1911	3.46727e-34	3.46461e-31	VC0362	tuf
NC_002505_KPS-14	+	382908	69	76	72	8	7	24	45.9514	2.87265	0.534138	5.37811	7.52727e-08	8.50063e-07	VC0362	tuf
NC_002505_KPS-14	+	382909	43	27	40	1	2	8	21.8098	3.70688	0.734648	5.04579	4.51647e-07	3.93861e-06	VC0362	tuf
NC_002505_KPS-14	+	382910	48	21	25	2	2	10	19.0969	3.12943	0.758722	4.1246	3.71372e-05	0.000155631	VC0362	tuf
NC_002505_KPS-14	+	383245	28	6	40	7	11	10	17.7175	1.7137	0.762104	2.24864	0.0245354	0.0402975	-	-
NC_002505_KPS-14	+	383255	20	4	24	1	3	2	9.67023	3.30812	1.01371	3.26338	0.00110091	0.00268	-	VC0364
NC_002505_KPS-14	+	384100	24	30	6	3	4	11	13.7311	2.13726	0.837543	2.55182	0.0107161	0.0194312	-	-
NC_002505_KPS-14	+	384101	319	664	327	133	98	157	304.827	2.1211	0.453306	4.67917	2.88036e-06	1.86657e-05	-	-
NC_002505_KPS-14	+	384102	152	386	139	68	27	65	152.189	2.45166	0.580103	4.22626	2.37608e-05	0.000107342	-	-
NC_002505_KPS-14	+	384103	21	77	25	14	8	23	29.9717	1.85983	0.702881	2.64601	0.00814474	0.0152782	-	-
NC_002505_KPS-14	+	384245	12	20	10	1	1	1	8.3586	4.15457	1.11329	3.73179	0.000190123	0.000606093	VC0366	rpsF
NC_002505_KPS-14	+	384523	28	8	8	0	5	0	8.75652	3.36596	1.23838	2.71804	0.00656701	0.012653	VC0366	rpsF
NC_002505_KPS-14	+	384554	45	37	21	3	7	3	21.0594	3.29141	0.705391	4.66608	3.07e-06	1.9683e-05	VC0366	rpsF
NC_002505_KPS-14	+	384565	38	58	21	1	2	3	22.857	4.65112	0.850633	5.46784	4.55561e-08	5.54259e-07	-	-
NC_002505_KPS-14	+	384569	20	8	4	1	0	0	5.97537	5.19364	1.53496	3.38357	0.000715487	0.00185733	-	VC0367
NC_002505_KPS-14	+	384655	23	11	3	0	0	0	6.73981	6.36743	1.5803	4.02924	5.59574e-05	0.000218601	-	VC0367
NC_002505_KPS-14	+	384656	32	20	10	0	3	0	11.8754	4.65009	1.16027	4.00775	6.13003e-05	0.000235564	-	VC0367
NC_002505_KPS-14	+	384709	20	9	9	2	3	2	8.00352	2.74187	0.914069	2.99963	0.00270304	0.00582314	-	VC0367
NC_002505_KPS-14	+	384978	35	58	32	2	5	5	25.2911	3.73984	0.68751	5.43969	5.33724e-08	6.34828e-07	VC0368	rpsR
NC_002505_KPS-14	+	385036	14	24	12	0	1	0	9.58323	5.88374	1.40113	4.19929	2.67749e-05	0.000118627	VC0368	rpsR
NC_002505_KPS-14	+	386568	517	459	490	147	159	217	349.053	1.83198	0.29114	6.29242	3.12558e-10	7.11136e-09	-	-
NC_002505_KPS-14	+	386761	53	50	34	17	24	7	32.945	1.7851	0.611189	2.9207	0.00349246	0.0072806	-	VC0371
NC_002505_KPS-14	+	387022	35	17	23	3	3	6	15.4868	2.98364	0.712936	4.18501	2.85156e-05	0.000124942	-	VC0371
NC_002505_KPS-14	+	387228	26	14	11	4	0	3	10.3811	3.18873	0.937781	3.40029	0.000673139	0.00176224	-	VC0371
NC_002505_KPS-14	+	387386	33	15	38	5	10	16	20.2579	1.83011	0.645158	2.83668	0.00455847	0.00918238	-	VC0371
NC_002505_KPS-14	+	387387	32	14	37	7	8	9	18.824	2.11188	0.638154	3.30936	0.000935087	0.00233182	-	VC0371
NC_002505_KPS-14	+	387434	24	21	22	8	2	12	15.5762	1.97665	0.686559	2.87906	0.00398857	0.00817391	-	VC0371
NC_002505_KPS-14	+	387510	26	7	19	6	0	6	11.2035	2.44871	0.945992	2.58851	0.00963913	0.0177063	-	VC0371
NC_002505_KPS-14	+	387616	21	12	27	3	2	7	12.7778	2.68776	0.771798	3.48246	0.000496822	0.00136011	-	VC0371
NC_002505_KPS-14	+	387706	253	142	263	49	23	80	143.113	2.48151	0.486538	5.10033	3.39059e-07	3.07688e-06	-	VC0371
NC_002505_KPS-14	+	387711	20	20	19	2	6	4	12.7794	2.62924	0.731458	3.59452	0.00032499	0.000951025	-	VC0371
NC_002505_KPS-14	+	387723	22	4	25	0	2	1	9.75881	4.39676	1.21134	3.62966	0.000283792	0.000846935	-	VC0371
NC_002505_KPS-14	+	388039	155	115	204	30	27	25	100.286	2.84287	0.430455	6.60434	3.9929e-11	1.13935e-09	VC0372	alr
NC_002505_KPS-14	+	388237	42	21	27	8	6	8	19.7874	2.34831	0.606986	3.86881	0.000109369	0.000380797	VC0372	alr
NC_002505_KPS-14	+	388253	30	6	16	2	5	10	11.793	1.96664	0.849081	2.3162	0.0205476	0.034468	VC0372	alr
NC_002505_KPS-14	+	388285	25	8	16	2	6	10	11.4758	1.79932	0.793469	2.26766	0.0233501	0.0385921	VC0372	alr
NC_002505_KPS-14	+	388326	20	16	23	1	10	3	13.0924	2.376	0.834051	2.84874	0.0043892	0.00888286	VC0372	alr
NC_002505_KPS-14	+	388541	39	20	33	2	2	2	17.8272	4.25691	0.812212	5.24113	1.59598e-07	1.62102e-06	VC0372	alr
NC_002505_KPS-14	+	388545	112	51	116	19	7	24	58.5562	2.82517	0.55898	5.05416	4.32298e-07	3.79152e-06	VC0372	alr
NC_002505_KPS-14	+	388546	88	56	91	16	13	24	51.1403	2.493	0.459282	5.42803	5.6979e-08	6.72316e-07	VC0372	alr
NC_002505_KPS-14	+	388647	42	21	36	5	6	6	20.7383	2.85964	0.627492	4.55724	5.18292e-06	3.03305e-05	VC0372	alr
NC_002505_KPS-14	+	388650	30	22	28	9	1	9	17.5703	2.4221	0.715887	3.38335	0.000716071	0.0018585	VC0372	alr
NC_002505_KPS-14	+	388651	16	16	22	2	3	5	11.5031	2.79187	0.767708	3.63663	0.000276232	0.000827578	VC0372	alr
NC_002505_KPS-14	+	388700	20	7	16	4	4	4	9.6582	2.14856	0.800602	2.68368	0.00728165	0.0138457	VC0372	alr
NC_002505_KPS-14	+	388809	42	30	35	7	13	23	25.9041	1.68388	0.550496	3.05883	0.00222202	0.00491512	VC0372	alr
NC_002505_KPS-14	+	389797	47	33	29	10	14	8	25.0023	2.06637	0.564833	3.65837	0.00025382	0.000770723	-	-
NC_002505_KPS-14	+	390109	25	12	20	0	1	0	10.6353	6.04139	1.37371	4.39788	1.09315e-05	5.65339e-05	VC0374	pgi
NC_002505_KPS-14	+	390311	20	5	15	5	2	3	8.79328	2.29217	0.897018	2.55532	0.010609	0.0192633	VC0374	pgi
NC_002505_KPS-14	+	391049	27	17	21	1	2	5	13.1076	3.38481	0.803933	4.21031	2.55017e-05	0.000113924	VC0374	pgi
NC_002505_KPS-14	+	392835	19	44	18	2	2	2	16.2593	4.11001	0.881061	4.66484	3.0886e-06	1.97859e-05	-	VC0376
NC_002505_KPS-14	+	394269	13	21	8	6	1	4	9.54273	2.27653	0.886832	2.56703	0.0102573	0.018702	-	-
NC_002505_KPS-14	+	394270	6	34	7	4	2	4	10.5338	2.61748	0.987505	2.65059	0.00803502	0.0150997	-	-
NC_002505_KPS-14	+	395735	171	199	111	56	56	90	119.203	1.61232	0.405668	3.97449	7.05304e-05	0.000264414	-	-
NC_002505_KPS-14	+	395736	52	61	50	24	13	22	39.2054	1.80405	0.477276	3.77989	0.000156895	0.000515643	-	-
NC_002505_KPS-14	+	397118	4	33	6	3	1	3	9.35283	3.01575	1.11024	2.7163	0.00660154	0.0127115	-	VC0384
NC_002505_KPS-14	+	401539	150	291	129	35	29	45	123.686	2.75259	0.48354	5.69258	1.25134e-08	1.80609e-07	-	-
NC_002505_KPS-14	+	402026	1	40	1	2	0	1	8.69871	4.20383	1.60945	2.61197	0.00900218	0.0166813	VCr010	16Sd
NC_002505_KPS-14	+	402101	2	38	1	2	0	3	8.72997	3.49013	1.46651	2.37989	0.0173176	0.0296457	VCr010	16Sd
NC_002505_KPS-14	+	409636	13	23	13	6	6	4	11.674	1.93896	0.738579	2.62525	0.00865841	0.0161217	VC0390	metH
NC_002505_KPS-14	+	409953	13	22	11	6	3	4	10.6223	2.15792	0.784128	2.752	0.00592322	0.0115578	VC0390	metH
NC_002505_KPS-14	+	410381	10	21	7	2	3	2	8.25163	2.78257	0.948274	2.93435	0.00334244	0.00700986	VC0390	metH
NC_002505_KPS-14	+	411455	6	33	2	2	3	3	9.10802	2.74335	1.13618	2.41455	0.0157547	0.0272808	VC0390	metH
NC_002505_KPS-14	+	411891	25	7	23	4	2	4	11.5236	2.77609	0.840046	3.30469	0.000950826	0.00236506	VC0390	metH
NC_002505_KPS-14	+	412046	17	30	18	5	3	5	14.1737	2.67399	0.724235	3.69216	0.000222361	0.000690052	VC0390	metH
NC_002505_KPS-14	+	416016	14	84	13	13	12	15	27.3516	1.85671	0.817549	2.27107	0.0231429	0.0382901	-	-
NC_002505_KPS-14	+	416634	8	28	2	4	0	2	8.19023	3.02404	1.251	2.41729	0.0156366	0.0271046	-	-
NC_002505_KPS-14	+	416834	3	24	7	2	1	5	7.68085	2.52493	1.09985	2.2957	0.0216929	0.0361695	-	-
[truncated: 22,964 more rows]
