# Supplementary material for: Gene autoregulation by 3’ UTR-derived bacterial small RNAs
Source: eLife. 2020 Aug 3;9:e58836. doi: 10.7554/eLife.58836 (PMC7398697; doi:10.7554/eLife.58836)
Supplement: Supplementary file 2. [file elife-58836-supp2.xlsx]

## Sheet: 3'UTR sRNAs with CS at 5' end
Supplementary File 2A: RNase E-mediated maturation of sRNAs from 3' UTRs
3'UTR-derived sRNAs with RNase E cleavage sites matching the first three bases of the annotated sRNA. 1 sRNAs added manually based on Northern blot results or published data.
ID	chromosome	start	end	size (nt)	strand	location	cleavage site	fold change	position relative to sRNA
4.5s RNA	chr1	1135413	1135549	136	sense	3'UTR	1135413	3.92	+1
FlaX	chr1	2334688	2334424	265	antisense	3'UTR	2334688	4.7	+1
Vcr016	chr1	215903	215970	67	sense	3'UTR	215903	331.51	+1
Vcr036	chr1	840471	840378	94	antisense	3'UTR	840471	5.46	+1
Vcr041	chr1	1023645	1023517	129	antisense	3'UTR	1023645	10.65	+1
Vcr044	chr1	1121911	1122039	128	sense	3'UTR	1121911	34.88	+1
Vcr045	chr1	1164273	1164325	52	sense	3'UTR	1164274	21.07	+2
Vcr052	chr1	1332791	1332980	189	sense	3'UTR	1332791	3.3	+1
Vcr053	chr1	1355410	1355297	114	antisense	3'UTR	1355410	4.47	+1
Vcr064	chr1	1595803	1595729	75	antisense	3'UTR	1595803	33.06	+1
FarS1	chr1	2266134	2266017	118	antisense	3'UTR	2266134	1.44	+1
Vcr078	chr1	2333096	2332924	173	antisense	3'UTR	2333096	88.41	+1
Vcr0791	chr1	2347333	2347174	160	antisense	3'UTR	2347333	1.2	+1
Vcr084	chr1	2554044	2553978	67	antisense	3'UTR	2554043	12.74	+2
Vcr088	chr1	2716912	2716841	72	antisense	3'UTR	2716912	9.16	+1
Vcr093	chr2	110038	109939	100	antisense	3'UTR	110038	23.59	+1
Vcr100	chr2	587130	587002	129	antisense	3'UTR	587130	12.04	+1

## Sheet: sRNAs with internal CS
Supplementary File 2B: RNase E-mediated processing of sRNAs
sRNAs with internal RNase E cleavage sites
ID	chromosome	start	end	size (nt)	strand	location	number of cleavage sites
Vcr010	chr1	168409	168508	99	sense	5'UTR	4
Vcr014	chr1	196242	196515	273	sense	3'UTR	1
Vcr017	chr1	350367	350275	93	antisense	IGR	8
Vcr026	chr1	523428	522818	611	antisense	3'UTR	7
Vcr028	chr1	622540	622441	100	antisense	intragenic	2
Vcr031	chr1	676059	676176	117	sense	IGR	2
Vcr032	chr1	689995	690171	176	sense	5'UTR	1
Vcr036	chr1	840471	840378	94	antisense	3'UTR	2
Vcr041	chr1	1023645	1023517	129	antisense	3'UTR	4
Vcr043	chr1	1114590	1114749	159	sense	5'UTR	9
Vcr044	chr1	1121911	1122039	128	sense	3'UTR	6
Vcr046	chr1	1198913	1199383	470	sense	5'UTR	26
Vcr047	chr1	1212055	1211896	160	antisense	3'UTR	2
Vcr051	chr1	1317848	1318006	158	sense	IGR	4
Vcr052	chr1	1332791	1332980	189	sense	3'UTR	3
Vcr053	chr1	1355410	1355297	114	antisense	3'UTR	2
Vcr063	chr1	1589571	1589313	259	antisense	3'UTR	5
Vcr065	chr1	1617123	1617248	125	sense	3'UTR	3
Vcr071	chr1	1953080	1953364	284	sense	IGR	2
Vcr072	chr1	2020067	2019904	164	antisense	IGR	1
Vcr074	chr1	2089903	2089784	120	antisense	IGR	3
Vcr078	chr1	2333096	2332924	173	antisense	3'UTR	6
Vcr079	chr1	2347333	2347174	160	antisense	3'UTR	1
Vcr080	chr1	2349771	2349864	93	sense	3'UTR	1
Vcr081	chr1	2394996	2394683	314	antisense	3'UTR	12
Vcr082	chr1	2433692	2433387	306	antisense	IGR	3
Vcr083	chr1	2472404	2472599	195	sense	anti-sense	3
Vcr085	chr1	2595215	2594967	249	antisense	3'UTR	4
Vcr090	chr2	3202	3285	83	sense	3'UTR	1
Vcr091	chr2	82959	83011	52	sense	3'UTR	2
Vcr092	chr2	100558	100683	125	sense	IGR	5
Vcr093	chr2	110038	109939	100	antisense	3'UTR	9
Vcr100	chr2	587130	587002	129	antisense	3'UTR	2
thi riboswitch	chr1	59794	59893	99	sense	5'UTR	2
RyhB	chr1	102456	102673	217	sense	IGR	2
CsrB	chr1	196932	196519	414	antisense	IGR	65
tmRNA	chr1	914666	914256	411	antisense	IGR	69
CsrC	chr1	943847	944216	369	sense	IGR	6
GcvB	chr1	954922	954718	205	antisense	IGR	3
Qrr1	chr1	1090058	1089964	95	antisense	IGR	5
4.5s RNA	chr1	1135413	1135549	136	sense	IGR	2
IGR2/lys riboswitch	chr1	1198913	1199383	470	sense	5'UTR	26
thi riboswitch	chr1	1374778	1375013	235	sense	5'UTR	4
glycine riboswitch	chr1	1520687	1520429	259	antisense	5'UTR	39
ykoK riboswitch	chr1	1786612	1786711	99	sense	5'UTR	21
c-di-GMP riboswitch	chr1	1860522	1860795	273	sense	5'UTR	2
rne 5'UTR	chr1	2181114	2181453	339	sense	5'UTR	2
TfoR	chr1	2236578	2236708	130	sense	IGR	3
FlaX	chr1	2334688	2334424	265	antisense	3'UTR	4
IGR3	chr1	2549443	2549650	207	sense	5'UTR	6
RNaseP	chr1	2581119	2580673	447	antisense	IGR	20
6s RNA	chr1	2658209	2658392	183	sense	5'UTR	2
Qrr2	chr2	48389	48555	166	sense	IGR	5
Qrr3	chr2	772258	772365	107	sense	IGR	1
CsrD	chr2	784129	783782	348	antisense	IGR	103
MicX	chr2	893616	893273	344	antisense	3'UTR	12
Qrr4	chr2	908306	908201	106	antisense	IGR	3
MtlS	chr2	994875	994756	120	antisense	IGR	1
VqmR	chr2	1031438	1031588	150	sense	IGR	6
