# Supplementary material for: Gene autoregulation by 3’ UTR-derived bacterial small RNAs
Source: eLife. 2020 Aug 3;9:e58836. doi: 10.7554/eLife.58836 (PMC7398697; doi:10.7554/eLife.58836)
Supplement: Supplementary file 3. [file elife-58836-supp3.xlsx]

## Sheet: BCM-sensitive transcripts
Supplementary File 3A: BCM-sensitive transcripts in Vibrio cholerae
*FDR p-values < 10-308 are shown as 0.
	EDGE test: WT BCM vs WT mock
Feature ID	Fold change	FDR p-value*
VrrA	-15.3505	0
RyhB	-10.8111	0
Vcr025	-9.46167	0
Vcr065	-8.52818	0
Vcr089	-8.24669	0
Vcr098	-7.77826	0
Vcr017	-7.71289	0
Vcr103	-7.57083	0
VC1484	-6.69134	1.64514e-114
VC0364	-6.59471	0
VqmR	-6.59303	0
VC2221	-6.37707	0
VC1323	-6.3539	2.50758e-176
VC2511	-6.06901	9.11749e-16
Vcr102	-6.02246	1.77999e-23
Vcr079	-5.86199	0
Vcr099	-5.83512	0
Vcr047	-5.75887	0
VCA0865	-5.67861	0
VCA0689	-5.5794	0
VCA0034	-5.43822	0
makC	-5.23976	1.12575e-105
Spot42	-5.19679	3.2394e-26
Vcr012	-5.18933	0
VC1403	-5.00052	0
pyrB	-4.94999	0
VC0706	-4.94033	0
VCA1024	-4.8688	1.92686e-36
VC1932	-4.81805	2.76326e-52
makB	-4.77139	0
Vcr080	-4.76213	9.75142e-14
VCA0691	-4.6668	0
VC0078	-4.64324	0
VCA1097	-4.63763	0
VC0089	-4.62188	1.04293e-78
Vcr106	-4.53402	0
VCA0690	-4.46457	0
VCA1034	-4.29063	0
clpS	-4.22321	0
VCA0742	-4.19499	1.52684e-11
makD	-4.15229	0
VCA0221	-4.14043	0
Vcr050	-4.09439	5.2029e-13
VCA0901	-4.0857	4.6235e-98
VC1868	-4.07045	0
makA	-4.04743	0
VC0038	-4.00175	1.39926e-99
VC2622	-3.93706	1.46518e-166
VC1402	-3.92447	0
Vcr006	-3.92426	2.77377e-11
VCA1033	-3.90963	0
VCA1017	-3.89295	0
VC2210	-3.87709	1.31654e-30
Vcr081	-3.87478	0
VCA0216	-3.86541	0
VCA0648	-3.85986	2.24293e-41
VCA0268	-3.85823	0
VC0658	-3.85555	0
VC0378	-3.83004	0
VCA0651	-3.81604	1.45581e-34
Vcr049	-3.80115	3.20842e-10
VCA0650	-3.79842	2.57194e-49
VCA0981	-3.78226	0
VC2161	-3.73959	0
VCA0571	-3.73915	0
VC0479	-3.70943	2.33971e-12
VCA0935	-3.6954	0
Vcr040	-3.67294	1.08286e-11
VC0365	-3.67188	0
VCA0900	-3.65059	5.34289e-83
VCA0803	-3.64138	0
VC2473	-3.62577	0
VC1605a	-3.61652	0
VCA0078	-3.61534	0
VCA0848	-3.59813	0
VC1854	-3.59164	0
VC2202	-3.59086	0
Vcr002	-3.57044	0
VC1183	-3.54711	0
VCA1113	-3.52415	0
VC0957	-3.51792	0
VCA0645	-3.50708	1.19329e-24
VC2013	-3.49048	0
Vcr011	-3.48273	1.71826e-17
Vcr104	-3.46825	3.99654e-25
VC2507	-3.46809	0
VCA0884	-3.45373	0
VCA0570	-3.44826	0
VCA0688	-3.42282	0
VCA1016	-3.4029	6.57719e-64
VC1405	-3.40078	0
VC1400	-3.39204	0
Vcr010	-3.37472	3.98676e-19
VC1080	-3.36348	0
VCA0008	-3.36055	0
VCA0909	-3.35991	0
VC1264	-3.35232	0
VC1184	-3.34474	0
VCA0222	-3.33511	0
VC1048	-3.32284	0
VC1348	-3.3138	0
VCA0593	-3.31271	0
ihfA	-3.30463	0
VC1401	-3.29475	0
VC0802	-3.28486	6.59104e-19
VCA0059	-3.28045	0
VC1603	-3.26054	0
VCA1042	-3.25291	0
VC2506	-3.24102	0
VC1872	-3.23757	0
Vcr003	-3.22751	0
VC2000	-3.22514	0
VCA1011	-3.22444	9.05185e-26
VCA0741	-3.20801	7.9635e-32
VCA0812	-3.19979	0
pyrE	-3.19583	2.37813e-22
VCA0080	-3.1866	0
VCA0210	-3.18451	0
VC1084	-3.18358	0
VC1083	-3.18076	0
VC1819	-3.17762	7.21679e-10
VCA0177	-3.17251	1.39871e-17
VC2201	-3.1693	0
VCA0681	-3.16896	0
VC1643	-3.15784	0
VCA0649	-3.15189	4.38407e-25
VCA0032	-3.14912	0
VC0533	-3.14762	0
VCA0948	-3.14711	7.51757e-05
pfkA	-3.13966	0
VC1873	-3.12512	0
VC1399	-3.10626	0
VCA0594	-3.08432	1.74594e-21
VC0966	-3.08289	9.24388e-36
VC1602	-3.08259	0
VC1538	-3.08051	0
VC2357	-3.07702	0
VC1362	-3.07449	0
VC2296	-3.07015	0
phhB	-3.06314	0
VC0936	-3.06281	0
VCA0647	-3.05135	7.68538e-13
phhA	-3.0502	0
VC2141	-3.04622	0
VC1560	-3.04599	0
Vcr070	-3.02002	5.74997e-07
VC1082	-3.01399	0
VC0737	-3.01292	0
VC2365	-3.01009	0
VCA0719	-3.0092	0
VC2470	3.00233	1.55389e-27
VC1446	3.00885	5.55259e-34
VC1245	3.01178	3.87879e-42
VC1650	3.01198	1.44627e-53
gltD_1	3.01457	3.43548e-34
VC0795	3.01623	1.24604e-23
VC2425	3.02172	1.58161e-19
VC0826	3.025	1.43565e-21
VC2555	3.02748	6.57197e-33
VCA0307	3.03423	3.85802e-18
VCA0194	3.03777	1.04734e-46
VC1778	3.04031	2.15983e-12
VCA0308	3.04044	2.87782e-44
VCA0766	3.04422	1.92952e-10
VC0847	3.05721	6.48307e-37
VCA0140	3.05942	7.1855e-42
VCA0853	3.06534	1.17072e-07
VC1562	3.06884	1.8366e-14
VCA0778	3.07582	5.54148e-41
VC0264	3.08929	8.62389e-32
VC1772	3.09918	1.57724e-33
prpB	3.09996	2.25911e-11
VC1859	3.10224	2.33002e-45
VC0702	3.10653	1.7388e-20
VC0343	3.13127	6.55389e-51
VC0887	3.13242	1.95207e-11
Vcr044	3.14243	1.03187e-26
VC2339	3.14542	4.32062e-79
VCA0038	3.15529	7.65096e-29
VCA0396	3.15566	8.02901e-22
VC1798	3.17004	6.09704e-28
VCA0020	3.17607	6.44517e-56
VC2004	3.18095	2.32147e-52
VC2333	3.19089	1.13159e-31
VCA0426	3.19461	1.41647e-26
VC1119	3.21876	3.81587e-26
VCA0745	3.22351	7.06826e-29
VC1712	3.23166	5.86672e-21
VC2300	3.2337	1.20477e-63
VCA0625	3.2353	1.00398e-27
VCA0309	3.23763	6.65292e-69
VCA0938	3.23855	6.89928e-48
VC1776	3.24024	1.21438e-27
VCA0704	3.24091	3.68793e-30
VC1906	3.24191	3.27993e-51
VC1713	3.26442	1.30448e-08
VC1418	3.27869	3.09104e-96
VC1570	3.29219	6.74125e-25
VCA0455	3.29619	1.74676e-31
VC0154	3.30147	7.22797e-79
VCA0314	3.30445	4.20573e-38
VC1131	3.31153	9.01711e-74
VC1647	3.31982	8.70998e-46
VCA0144	3.33674	2.80585e-54
VCA0148	3.34326	9.98152e-107
VC0385	3.34399	2.44095e-41
VC1058	3.34419	7.54046e-17
VC1070	3.3506	7.53355e-29
VCA0040	3.35745	1.39004e-43
VC0672	3.35891	3.8701e-160
VCA1101	3.37319	1.32053e-27
VC1246	3.37578	1.50557e-28
VC1330	3.37808	1.95762e-19
VC2031	3.3851	1.4374e-37
VC2371	3.38522	1.96781e-16
VC0858	3.38729	1.36489e-11
VCA0446	3.39272	9.03714e-12
ribB	3.39793	9.45123e-27
VC0852	3.41002	1.39087e-66
envZ	3.41922	1.71265e-71
VC1808	3.42592	1.53298e-19
VC1826	3.43732	1.12211e-60
VC1337	3.438	1.74564e-22
guaA	3.43904	3.00444e-164
VC0862	3.4408	4.7234e-20
VC0703	3.44226	1.10995e-70
VCA0546	3.44555	6.91584e-104
VC0194	3.45761	3.03268e-69
VCA0121	3.47802	1.43561e-33
VCA0663	3.48173	1.47554e-33
VC2706	3.49027	3.23816e-42
VC2661	3.49189	4.19043e-44
VCA0849	3.49508	2.12965e-101
VC1311	3.49975	2.51816e-54
VCA0949	3.50196	1.0941e-22
VC2019	3.50571	7.51184e-83
VC1764	3.50996	2.15913e-97
VC1743	3.51709	1.14556e-19
VC1215	3.5657	1.18934e-154
VC0810	3.58937	3.46842e-15
VCA0543	3.60019	2.2201e-21
VCA0873	3.6051	2.15722e-58
VC1194	3.63078	5.65327e-160
VC0263	3.63391	7.65344e-41
VC1035	3.63515	3.05263e-10
VCA0898	3.63756	3.95888e-170
VCA0926	3.64293	1.38798e-97
VCA0213	3.64885	2.78005e-110
VC0687	3.67901	1.43787e-71
VC1811	3.6798	5.8402e-21
VC1701	3.68439	1.72355e-14
VCA0306	3.69307	6.53423e-15
VC1231	3.71557	3.58305e-39
VC2637	3.73418	4.45851e-09
VC1981	3.76644	5.97424e-45
mdoG	3.79244	5.92725e-98
VC0619	3.79657	4.14485e-22
VC1700	3.807	7.41932e-93
VCA0799	3.8122	2.4385e-31
VCA0283	3.82511	1.07586e-149
VCA0039	3.82912	1.09233e-35
VC1244	3.83878	6.13717e-32
VC1782	3.84982	5.16418e-58
VC0825	3.85784	3.87115e-21
VCA0779	3.87789	1.19584e-149
glpQ	3.89845	3.98588e-46
VC0917	3.90316	4.45984e-12
VC0351	3.90577	1.50706e-12
VC1917	3.91682	9.39291e-10
VCA0330	3.93253	2.6657e-36
glpT	3.93615	2.48232e-141
VCA0123	3.93685	7.13874e-172
VCA0897	3.958	6.43265e-31
VC2643	3.96243	4.82406e-39
VCA0325	3.97817	6.37757e-51
VC1825	3.98242	2.488e-34
VCA0274	3.98473	1.08977e-91
VC1799	4.01342	1.42156e-40
VC2704	4.01898	5.97401e-34
cysN	4.02455	8.47755e-32
VCA0863	4.02979	1.44188e-153
VC1800	4.04581	1.38356e-30
VCA0889	4.05291	6.94892e-192
VC0651	4.09242	7.4671e-151
VC1071	4.09414	2.4871e-48
VC1105	4.09737	1.21063e-50
VC1419	4.10493	5.66728e-41
VC1852	4.11183	9.65567e-39
VC1553	4.11454	3.52261e-19
VCA0896	4.1167	3.49082e-170
VC0337	4.13936	3.69435e-125
VC0767	4.15035	1.8872e-113
VCA0165	4.1838	2.27931e-181
VCA0250	4.19637	1.21523e-128
VC1296	4.19935	2.06036e-31
VC1577	4.21009	3.09524e-22
VC1938	4.21428	4.59317e-87
VCA0680	4.22253	4.03693e-17
VC1432	4.23459	1.44006e-130
VC2650	4.24278	2.45143e-21
thyA	4.2546	5.85644e-71
VC0791	4.25882	7.21339e-34
VC0191	4.26343	1.11595e-66
VCA0135	4.28323	1.9109e-49
VC1149	4.28786	3.33206e-105
VCA0559	4.32147	7.58726e-66
VC1111	4.3344	6.03302e-36
VC1644	4.34687	4.87353e-129
VCA0676	4.40088	1.78584e-27
VCA0587	4.40809	1.14328e-47
VCA0890	4.42605	1.46434e-63
VC1334	4.43437	3.54559e-21
VC1329	4.44556	1.2566e-12
VC2382	4.45558	1.07443e-151
VC1606	4.45686	5.77361e-166
VC0613	4.46214	1.90382e-86
VC1549	4.47427	4.73106e-30
VCA1111	4.47805	1.16204e-34
VCA1031	4.48252	1.29574e-200
VCA0302	4.49825	7.90633e-40
VC1550	4.51379	6.14437e-31
VC1583	4.52	7.74217e-35
VC2554	4.52274	7.865e-171
VCA0266	4.5292	1.29394e-51
VCA0218	4.53536	1.58692e-94
VCA0529	4.55441	1.09886e-37
VC0176	4.56359	5.25352e-24
VCA0338	4.58047	3.1003e-14
VCA0871	4.58264	1.17521e-159
VCA0322	4.59427	5.92443e-21
VCA0678	4.59632	6.29735e-87
VC1005	4.59898	4.71454e-146
VC2373	4.60613	9.52715e-103
VCA0192	4.61825	7.56256e-158
VCA0260	4.64174	8.26614e-33
VC1355	4.66978	8.97106e-26
VC1924	4.67208	1.02429e-11
VC0794	4.67319	4.28956e-25
VCA0361	4.68329	3.82086e-40
VC2254	4.68502	1.04241e-123
VCA0358	4.69024	3.99652e-30
VC0618	4.69227	1.4412e-24
VCA0753	4.695	1.62431e-29
VCA0329b	4.73431	3.34355e-89
VCA0019	4.74025	1.24666e-33
VCA1019	4.74297	2.4661e-13
VCA0304	4.77417	2.12911e-26
rho	4.80664	2.31911e-177
VC1794	4.82637	3.73811e-16
VC1196	4.84342	9.51491e-88
VC1783	4.87067	7.09243e-185
VCA0599	4.88416	6.44944e-154
VC0773	4.88616	5.21024e-70
VCA0862	4.90826	8.14757e-43
VCA0253	4.91783	2.53039e-26
VCA0340	4.92475	8.31823e-31
VC0281	4.93108	1.11896e-40
VC1671	4.94151	1.1144e-204
VCA0397	4.94183	1.50173e-27
VCA0313	5.0004	8.84626e-14
VCA0726	5.00126	1.18827e-198
VCA0092	5.07007	1.03698e-93
VCA0420	5.07686	7.81185e-60
VCA0458	5.07697	2.05857e-159
VC1584	5.08031	5.08092e-15
VC2429	5.08385	5.47468e-42
VCA0382a	5.10642	3.58274e-23
VC1287	5.11502	6.41044e-214
malS	5.11653	1.54216e-156
VC0673	5.11915	2.04972e-41
xseA	5.12157	2.68293e-99
VC0614	5.14356	1.73485e-31
VC1609	5.15477	2.17785e-187
VCA0351	5.18836	7.3762e-59
VCA0317	5.24846	4.53116e-26
VCA0485	5.2544	2.67336e-39
VCA0854	5.25465	2.70897e-35
VC1822	5.25904	2.10201e-224
modC	5.28346	1.45339e-139
VC2564	5.29863	4.51507e-179
VC0497	5.31369	2.16381e-16
VC1636	5.32865	9.21454e-146
rbsC	5.35528	8.77901e-136
VCA0856	5.36793	5.46842e-26
modB	5.3712	3.05813e-196
VC0652	5.3743	4.60363e-215
VC2534	5.38748	2.35519e-227
VC1579	5.39571	1.14429e-112
VCA0120	5.41745	2.10656e-241
VCA0677	5.43035	1.16305e-20
VCA0419	5.46548	2.88217e-118
VC1784	5.47406	1.63388e-199
VCA0756	5.47495	3.43626e-25
VCA0402	5.47928	1.49489e-138
VC1607	5.48195	1.80466e-152
VCA0469	5.52101	8.37334e-47
VC1812	5.57078	3.67398e-55
VC1990	5.58165	1.14898e-170
VCA0470	5.61126	9.15127e-109
VC1749	5.62176	1.94496e-57
VC1069	5.62674	8.99671e-64
VC1815	5.63733	2.66439e-37
VC1235	5.64818	9.12796e-96
VCA0596	5.66402	3.13825e-134
VCA0387	5.67828	4.61834e-94
VCA0130	5.7097	6.54693e-46
VCA0496	5.71167	5.99791e-145
VC1571	5.71675	2.92138e-84
VC1416	5.72731	4.35759e-160
VCA0310	5.72804	6.54707e-42
VC2383	5.76399	2.05336e-142
VC1658	5.79666	8.67079e-105
VCA0107	5.81356	6.28747e-35
VC0616	5.82653	2.47973e-42
VCA0963	5.8654	6.11428e-109
VC1415	5.95997	4.54365e-31
VCA0116	6.00821	5.45795e-159
VC2761	6.01263	6.59622e-139
VC1462	6.013	5.36162e-14
VCA0474	6.05186	3.51519e-66
VC2561	6.05897	1.23677e-76
VC1939	6.06368	1.90341e-120
VC0845	6.06374	3.68358e-164
VCA1109	6.07377	1.38809e-20
VCA0714	6.07717	3.62624e-48
VCA0128	6.07907	2.13087e-121
VCA0483	6.0843	8.94719e-177
VC2324	6.08595	9.98583e-94
VC1540	6.09935	1.12974e-168
VCA0388	6.13801	3.3083e-77
VCA0085	6.15115	6.17973e-135
VC1625	6.19196	4.18898e-168
VCA0440	6.20032	1.05389e-64
VCA0147	6.20431	5.80801e-89
VC1042	6.21168	2.72868e-118
VC2560	6.22009	1.77047e-49
argC	6.22415	3.7011e-50
VCA0425	6.22861	4.18732e-87
VCA0769	6.24887	2.34144e-148
VCA0109	6.27904	1.59354e-81
VCA0679	6.30231	1.53973e-27
VCA0454	6.34083	2.50823e-30
VCA0405	6.38446	5.94287e-25
VCA0127	6.39002	1.43921e-45
VC0130	6.40108	7.31271e-245
VCA0952	6.41366	2.82821e-24
VCA0382	6.43137	3.1956e-127
VC1593	6.49202	8.08296e-76
VCA0166	6.49482	4.34676e-87
VCA0108	6.49867	2.4167e-150
VCA0356	6.55128	4.56324e-135
VCA0023	6.59096	1.16118e-114
VCA1000	6.60522	4.67618e-87
VC1929	6.60556	1.42579e-30
VC0783	6.60987	3.05906e-97
VCA0785	6.62209	5.48188e-168
VC2480	6.63032	2.28788e-184
VCA0286	6.63334	2.14958e-53
VC1814	6.63711	1.35867e-55
VCA0447	6.64174	8.98925e-39
VCA0962	6.65201	1.45733e-185
VC2552	6.65634	1.5786e-166
VC1796	6.75014	2.12334e-26
VC1585	6.75531	5.97796e-109
VC1608	6.79553	5.50144e-278
VC0612	6.79757	2.07408e-106
VC1061	6.87783	5.81182e-111
VCA0421	6.99886	3.60271e-46
VCA0117	7.09452	6.43105e-218
VCA1008	7.09828	1.22677e-37
VCA0601	7.0998	2.04665e-162
VC1332	7.12159	2.24885e-100
VCA0018	7.16603	2.71329e-118
cls	7.19887	1.64892e-253
VC0617	7.2257	4.21973e-55
VC1420	7.28365	6.76223e-137
VCA0258	7.28735	4.17306e-124
VCA0505	7.32064	3.82347e-50
VCA0285	7.39246	3.05721e-76
VCA0339	7.39639	2.46102e-46
VCA1057	7.39718	1.44415e-26
VCA0846	7.41003	2.30331e-54
VCA0707	7.43749	7.15676e-139
VC1460	7.47608	3.84474e-129
VC1318	7.50775	1.77415e-62
VCA0936	7.57114	1.52682e-88
VCA0409	7.67526	1.55207e-75
VC0928	7.70117	1.71838e-52
VCA0354	7.73308	3.33144e-65
VCA0119	7.74564	2.09304e-152
VC1542	7.82062	1.78496e-191
VC1551	7.8515	2.70583e-26
VCA1048	7.86276	2.40589e-181
VC1274	7.86496	1.57869e-235
VC2711	7.90721	6.16275e-233
VC1275	7.91224	9.16506e-201
VCA1100	7.99337	1.6025e-120
VC1333	7.9956	2.74297e-33
VCA0433	8.03181	1.86856e-149
VC0615	8.05171	3.14856e-134
VC1827	8.08019	6.17941e-12
VCA0990	8.08519	7.68337e-175
VCA0237	8.1016	6.26339e-36
VCA0104	8.21164	3.13619e-181
VC1189	8.282	3.47607e-96
VCA0088	8.29322	7.54848e-183
VCA0450	8.31513	2.67908e-67
VCA0408	8.31743	5.9834e-31
VCA0410	8.39304	1.45081e-65
VC0090	8.39411	1.93982e-178
VC1927	8.48498	1.84016e-46
VCA0017	8.48978	1.10043e-35
VCA0432	8.50151	1.14399e-60
VCA0118	8.64234	4.90494e-166
VC0823	8.6512	7.3186e-75
VCA0484	8.65938	9.92166e-68
VCA1013	8.72458	1.69402e-155
VCA0090	8.7676	4.89076e-229
VCA0780	8.77643	2.39164e-170
VC1937	8.81565	1.60731e-131
VCA0134	8.8349	8.26252e-153
cadB	8.85653	1.30701e-159
VCA0708	8.87565	1.32869e-84
VCA0442	8.88079	3.58916e-64
VC1068	9.03444	4.88458e-115
VCA0068	9.05797	1.42472e-207
VC1928	9.1423	6.35562e-31
VCA0240	9.15681	1.13936e-101
VC1451	9.1573	6.95709e-250
VCA0964	9.24433	3.73114e-185
VCA0331	9.26596	1.39896e-117
VCA0457	9.2867	5.29325e-121
VCA0436	9.42246	9.36544e-92
VC1612	9.46018	6.81284e-174
VCA0605	9.47207	2.17865e-69
VC0022	9.48906	1.495e-192
VC0496	9.51338	6.27647e-50
VCA0460	9.62235	9.04057e-86
VC1748	9.66639	2.30986e-133
VCA0355	9.73335	8.53851e-149
VC0674	9.73503	2.56387e-246
VC1422	9.7389	1.22304e-217
VCA0241	9.74597	2.06556e-122
VCA0115	9.8046	9.63575e-146
VC0841	9.8609	2.656e-125
VC1449	9.90813	1.04928e-54
VC0837	10.0023	3.19209e-116
VCA0540	10.0734	1.00496e-120
VCA0510	10.0767	1.07395e-260
VC0831	10.4061	1.06831e-95
VCA0961	10.4253	2.33464e-177
VC0183	10.436	6.71449e-243
VC2719	10.5324	4.56596e-35
VC0495	10.5738	9.34519e-65
Vcr097	10.6501	1.53397e-179
VC1582	10.7512	1.44065e-156
VC1940	10.7519	7.89596e-85
VCA0114	10.7842	3.37218e-225
VC1944	10.8172	2.84708e-143
VCA0399	10.8198	3.00647e-130
tbpA	10.8469	1.49487e-233
VCA0993	10.8698	1.00842e-65
VC0801	11.0111	5.81486e-50
VC0819	11.0424	6.2255e-58
VCA0179	11.0914	4.0748e-168
VC1935	11.121	9.52038e-198
VC0494	11.3889	6.96024e-90
VC0775	11.4731	2.00963e-164
VCA0872	11.5485	2.55459e-216
VC0932	11.5998	8.02471e-58
VCA0604	11.6362	5.56018e-55
VCA0431	11.6535	5.90665e-127
VCA0992	11.7284	6.56865e-33
ulaD	11.8303	1.67508e-94
VCA0501	11.8347	2.81194e-164
VCA0443	11.8525	1.0564e-42
VC0391	11.9119	7.21495e-235
VC0931	11.9753	7.79332e-120
VCA0357	12.2112	2.89404e-77
VCA0112	12.2561	1.46787e-205
VC0833	12.3647	3.05338e-59
thiP	12.3729	2.48884e-262
VCA1110	12.3809	9.6221e-96
VC0842	12.429	1.14687e-39
tpx	12.4581	3.75175e-138
VCA0801	12.4879	1.58097e-265
VC0844	12.4989	6.19207e-43
VCA0406	12.5372	4.29934e-96
VCA0441	12.5462	1.75335e-160
VCA0350	12.5854	1.29164e-66
VCA0834	12.6843	6.07831e-201
VCA1012	12.7037	5.02052e-28
VC1453	12.8112	5.6313e-107
VC0820	12.8696	3.3801e-119
VC0836	13.071	9.66961e-131
VCA0389	13.1057	3.86693e-108
VCA0449	13.2491	2.75295e-49
VCA0110	13.28	2.50108e-242
VCA0727	13.3033	1.70894e-262
VC2537	13.4896	6.63547e-160
VC1945	13.5995	2.84169e-231
VC0821	13.6507	1.10379e-258
VCA0380	13.8194	9.26491e-51
VC1655	13.8521	3.55367e-182
VC0829	13.9995	5.03307e-96
VCA0490	14.0161	3.5934e-214
VC1073	14.1471	3.76993e-196
VCA0534	14.244	4.18601e-221
VCA0822	14.5856	3.17269e-274
VC0175	14.731	6.34032e-260
VC1447	14.8019	3.27534e-92
VCA0558	14.8592	5.78024e-284
VCA0113	14.9301	1.45725e-44
VCA0480	15.1736	7.03189e-81
VCA1102	15.4428	2.31315e-174
VCA0991	15.563	7.6936e-209
VC0465	15.6655	7.50999e-172
VC1936	15.7341	1.13658e-207
VCA0511	15.7688	1.67857e-252
VCA0329a	15.7773	7.95285e-50
VCA0146	15.7818	4.52285e-281
VCA0193	15.8342	1.17581e-230
Vcr013	15.9441	3.51089e-80
VCA0602	16.2051	2.3587e-85
araD	16.3807	5.81483e-92
VC1581	16.5652	7.22703e-170
VC1448	16.6371	3.13619e-181
VC1533	16.6903	4.90698e-172
VCA0374	16.8165	1.82521e-134
VC2479	16.8933	2.86373e-255
VC0489	16.9714	6.46189e-173
VCA0825	17.0834	3.32114e-236
potE	17.159	1.43919e-270
VCA0111	17.1637	3.71931e-209
VCA0824	17.252	5.52193e-293
VCA0414	17.6407	1.74336e-124
VC0840	17.7792	1.40697e-237
VCA0491	17.8595	1.18454e-152
VCA0459	17.9671	1.25948e-235
VC0835	18.1506	1.81372e-153
VC1888	18.2415	2.4156e-258
VCA1006	18.6464	3.43845e-72
VCA0413	18.6876	2.01648e-67
nrdG	18.8348	2.13238e-223
VC1806	18.9108	9.18873e-166
VCA0692	18.9793	1.64249e-275
ectC	19.0678	8.08697e-264
VCA0463	19.5739	3.8265e-143
VCA0407	19.9218	1.00298e-110
VC0843	20.1601	1.12366e-146
VCA0403	20.2199	2.43575e-177
VCA0891	20.2331	6.02458e-251
VC0839	20.2457	2.22312e-203
VC1390	21.0888	2.30551e-245
VCA0375	21.3629	9.13589e-194
VCA0243	21.4994	1.56074e-132
VC1185	22.0541	4.33826e-297
thiG	22.0907	1.43071e-259
VC1450	23.2732	2.68818e-235
VC0376	23.3323	2.67637e-193
VC2508	23.3768	5.328e-180
VC2553	23.3888	1.1972e-248
VC0799	23.649	6.90366e-157
VCA0363	24.153	7.11465e-118
VC0828	24.8958	2.77112e-102
VCA0245	25.828	3.10351e-114
VC1804	27.6981	3.61829e-177
VCA0723	27.7851	0
secD_2	29.1678	4.0874e-255
VCA0768	29.4201	3.24035e-305
VCA0435	29.5873	4.92846e-143
VCA0969	29.8095	3.24742e-231
VCA0254	30.13	2.85774e-209
VC2712	30.3221	4.33506e-268
thiH	30.3913	8.34509e-275
VCA0416	31.0443	1.7878e-181
VCA0418	31.5655	1.88916e-120
VCA0028	32.0468	9.67615e-189
VC1970	33.9008	3.18886e-249
VC0666	34.1121	1.96499e-65
VCA0754	35.0598	1.01489e-90
VC0157	37.2433	0
VC1949	39.3729	1.10621e-234
VCA0284	39.6572	4.70322e-227
VC1786	40.7019	1.50051e-243
VC1781	40.8065	5.4483e-190
VC0184	41.4862	1.45779e-258
VCA0473	41.503	6.45107e-164
VC0061	42.5426	0
VC1535	44.837	1.08563e-307
VC2388	45.2639	7.03037e-273
VC1272	47.2261	5.27686e-211
VC0504	54.0616	1.52458e-130
VC1273	59.2862	6.53421e-270
VC0063	84.2089	0
VCA1063	88.8019	0
thiE	91.448	0
VCA0530	120.542	0
VC0506	180.042	0

## Sheet: Opp regulation
Supplementary File 3B: Regulation of oppABCDF and OppZ depending on oppB translation and BCM
*FDR p-values < 10-308 are shown as 0.
	WT BCM vs. WT mock		oppB-ATC mock vs. WT mock		oppB-ATC BCM vs. WT BCM		oppB-ATC BCM vs. oppB-ATC mock
Feature ID	Fold change	FDR p-value*	Fold change	FDR p-value*	Fold change	FDR p-value*	Fold change	FDR p-value*
oppA	-1.75	0	-1.18	0.15	-1.18	0.12	-1.75	0
oppB	-1.15	0.05	-4.42	0	1.35	0	5.18	0
oppC	-1.25	0	-7.87	0	-1.15	0.21	5.5	0
oppD	-1.15	0.08	-8.76	0	-1.27	0.01	6.03	0
oppF	-1.36	0	-8.63	0	-1.35	0	4.68	0
oppZ	1	1	-7.76	0	-2.04	0.05	3.82	0
